# Supplementary material for: Estimating the distribution of morbidity and mortality of childhood diarrhea, measles, and pneumonia by wealth group in low- and middle-income countries
Source: Springer Nature journal article supplement (doi:10.1186/s12916-018-1074-y), 2018-06-28
Supplement: MOESM1 [file 15908238]

# Estimating the distribution of morbidity and mortality of childhood diarrhea, measles, and pneumonia by wealth group in low- and middle-income countries

Angela Y. Chang, Carlos Riumallo-Herl, Joshua A. Salomon, Stephen C. Resch, Logan Brenzel, Stéphane Verguet

## Web Appendix

### Table of Contents

|      |                                                                                                                                                                                   |    |
|------|-----------------------------------------------------------------------------------------------------------------------------------------------------------------------------------|----|
| I.   | Country selection and Demographic and Health Survey year .....                                                                                                                    | 2  |
| II.  | Methods in detail.....                                                                                                                                                            | 4  |
| a.   | An example of the method to distribute cases/deaths across wealth quintiles.....                                                                                                  | 4  |
| b.   | Calculation of the area under the curve (AUC) .....                                                                                                                               | 5  |
| III. | Selection of risk and prognostic factors .....                                                                                                                                    | 6  |
| IV.  | Input data for quintile-specific vaccine and treatment coverage rates, risk and prognostic factor prevalence, and total fertility rate for 41 low- and middle-income countries .. | 7  |
| V.   | Full results.....                                                                                                                                                                 | 19 |
| VI.  | Sensitivity analyses .....                                                                                                                                                        | 26 |
| VII. | References .....                                                                                                                                                                  | 37 |

## I. Country selection and Demographic and Health Survey year

We selected 41 low- and middle-income countries with Demographic and Health Surveys available after 2010, listed in Table S1 (1).

**Table S1.** List of 41 countries and Demographic and Health Survey year

| Country                          | Year of Demographic and Health Survey |
|----------------------------------|---------------------------------------|
| Armenia                          | 2010                                  |
| Bangladesh                       | 2011                                  |
| Benin                            | 2011-12                               |
| Burkina Faso                     | 2010                                  |
| Burundi                          | 2010                                  |
| Cambodia                         | 2014                                  |
| Cameroon                         | 2011                                  |
| Chad                             | 2014-15                               |
| Comoros                          | 2012                                  |
| Democratic Republic of the Congo | 2013-14                               |
| Congo                            | 2011-12                               |
| Côte d'Ivoire                    | 2011-12                               |
| Ethiopia                         | 2011                                  |
| The Gambia                       | 2013                                  |
| Ghana                            | 2014                                  |
| Guinea                           | 2012                                  |
| Haiti                            | 2012                                  |
| Honduras                         | 2011-12                               |
| Indonesia                        | 2012                                  |
| Kenya                            | 2014                                  |
| Kyrgyz Republic                  | 2012                                  |
| Lesotho                          | 2014                                  |
| Liberia                          | 2013                                  |
| Malawi                           | 2010                                  |
| Mali                             | 2012-13                               |
| Mozambique                       | 2011                                  |
| Nepal                            | 2011                                  |
| Niger                            | 2012                                  |
| Nigeria                          | 2013                                  |
| Pakistan                         | 2012-13                               |
| Rwanda                           | 2010                                  |
| Senegal                          | 2014                                  |
| Sierra Leone                     | 2013                                  |
| Tajikistan                       | 2012                                  |
| Tanzania                         | 2010                                  |

|             |         |
|-------------|---------|
| Timor-Leste | 2009-10 |
| Togo        | 2013-14 |
| Uganda      | 2011    |
| Yemen       | 2013    |
| Zambia      | 2013-14 |
| Zimbabwe    | 2010-11 |

## II. Methods in detail

- a. An example of the method to distribute cases/deaths across wealth quintiles

We estimate the distribution of cases when no vaccines are available based on two inputs: the relative risk of the risk factor (how important the risk factor is in increasing the likelihood of the disease) and the prevalence of the risk factor (how common it is in each quintile).

As an example, assume we have three risk factors, A, B, and C for measles, and the relative risk of each are 5.0, 3.0, and 2.0. Following the equation  $w_j = \frac{RR_j}{\sum_{k=1}^n RR_k}$ , the weight we assign for each risk factor would be:

$$w_a = \frac{5.0}{(5.0 + 3.0 + 2.0)} = 0.5$$

$$w_b = \frac{3.0}{(5.0 + 3.0 + 2.0)} = 0.3$$

$$w_c = \frac{2.0}{(5.0 + 3.0 + 2.0)} = 0.2$$

Second, assume we know from the DHS that the prevalence of risk factor A for each quintile is 90%, 80%, 70%, 60%, and 50%, for risk factor B is 50%, 40%, 30%, 20%, 10%, and for risk factor C is 5%, 4%, 3%, 2%, 1%.

Then, following equation (1) from the main text  $Ac_i = \frac{\sum_{j=1}^n w_j P_{ij}}{\sum_{m=1}^5 \sum_{j=1}^n w_j P_{mj}}$ , the proportion of attributable cases occurring in the first quintile would be:

$$\frac{(\text{weight of A} * \text{prevalence of A in quintile 1} + \text{weight of B} * \text{prevalence of B in quintile 1} + \text{weight of C} * \text{prevalence of C in quintile 1})}{\text{sum of the products of weight and prevalence of all quintiles}}$$

*With this example, it would be:*

$$\frac{(0.5 * 90\% + 0.3 * 50\% + 0.2 * 5\%)}{(0.5 * (90\% + 80\% + 70\% + 60\% + 50\%) + 0.3 * (50\% + 40\% + 30\% + 20\% + 10\%) + 0.2 * (5\% + 4\% + 3\% + 2\% + 1\%))} = 27\%$$

We interpret this to say that, out of the 100% of cases that would happen in this country, we expect to have 27% of cases in quintile 1.

b. Calculation of the area under the curve (AUC)

To compare the distributions of cases (or deaths) in each of the scenarios, we explored the area under the curve (AUC) of the cumulative percentage of cases (or deaths) by quintile, and calculated the changes in the AUC for each scenario, compared to Scenario 1 when no vaccines (or treatment) are available. For example, an increase in the AUC after vaccine program suggests that, among the remaining cases not averted by the program, a higher percentage of cases would be among the lower wealth quintiles compared to prior vaccine program. As illustrated in Figure S3.1, if cases are distributed equally across quintiles (i.e., 20% in each quintile), the AUC equals 250 ( $=5 \times 100/2$ ). Having an AUC greater than 250 (the area outside of the triangle) suggests that higher percentages of cases are in the lower wealth quintiles. The illustration shows a decrease in AUC after vaccine introduction (decrease in the area). On the other hand, an increase in the AUC between the two scenarios suggests that, among the remaining cases not averted by the program, a higher percentage of cases is among the lower wealth quintiles compared to prior vaccine introduction.

**Figure S3.1.** Illustration of the area under the curve analysis.

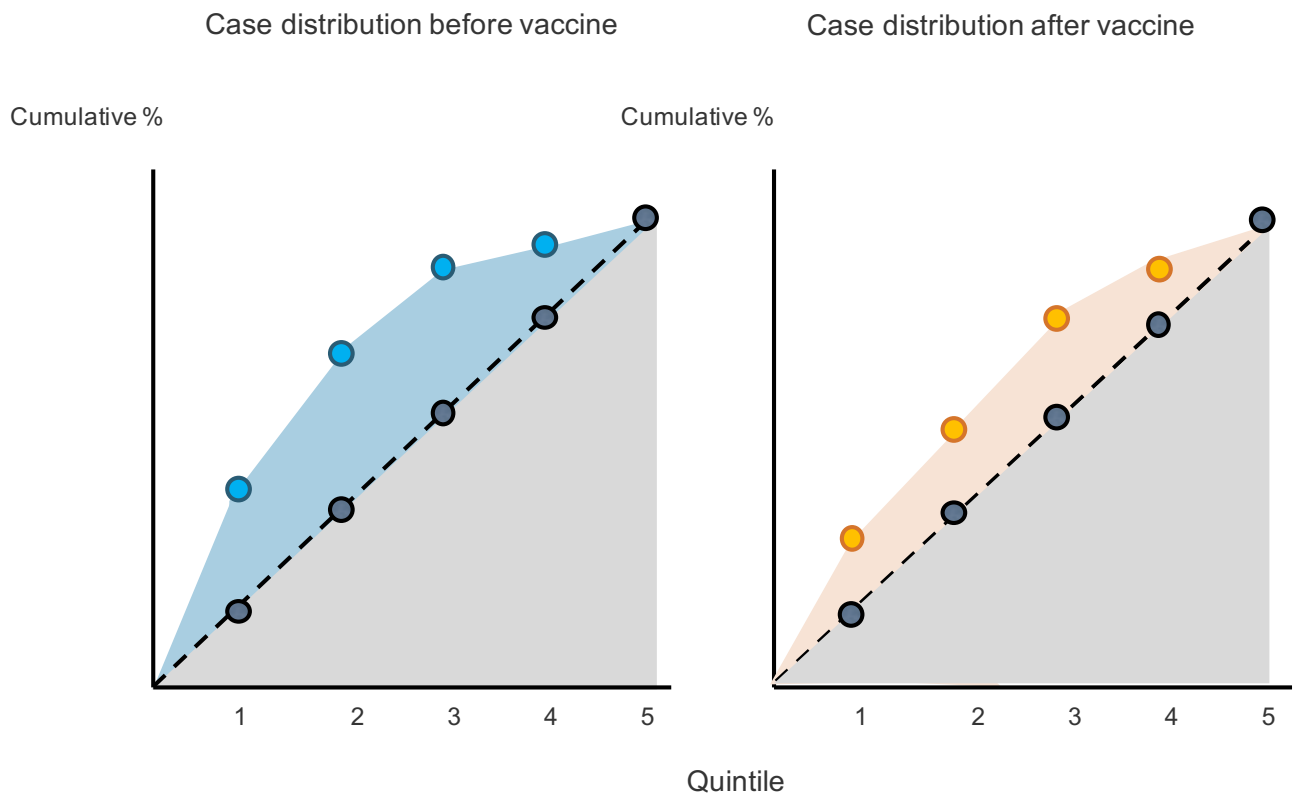

### III. Selection of risk and prognostic factors

We first searched the literature for risk and prognostic factors with the highest relative risks for diarrhea, measles, and pneumonia. For each risk factor, we also checked its availability by quintile-specific prevalence rate in the DHS (1). Factors that did not match with DHS variables, had poor data quality, were not studied in systematic reviews, or had poor variable definition according to experts were excluded. We shortlisted five factors per disease (listed in the main paper, Table 2).

Prevalence rates by wealth quintile for malnutrition metrics (wasting, underweight, and stunting) and low birth weight were available in the DHS for most countries. The relative risk (RR) for each childhood malnutrition exposure is adjusted for the joint effect of the other malnutrition indicators, as described by the GBD 2013 Risk Factors Collaborators (2), and therefore assumed independent. We applied neighboring country data to countries with missing data.

Prevalence rates of vitamin A deficiency by wealth quintile were proxied with the percentage not given vitamin A supplements in the past six months among children aged 6 to 59 months. For countries missing this variable, we used the percentage who did not consumed foods rich in vitamin A in the past 24 hours among age 6 to 23 months as replacement.

For estimating the level of sanitation in one's household, we used the percentage of children whose stools were not disposed safely as a proxy.

For non-exclusive breastfeeding, the DHS provides data on the median duration (in months) of exclusive breastfeeding in the past three years by wealth quintile, and the national average (percentage) of exclusive breastfeeding among children of ages zero to five months and zero to six months. To estimate the burden of non-exclusive breastfeeding, we assumed that the ratio of the average duration of exclusive breastfeeding of a wealth quintile to the national average is proportional to the ratio of the percentage of people exclusively breastfeeding in the same wealth quintile to the national average. The burden of non-exclusive breastfeeding is calculated as 100% minus the estimated prevalence of exclusive breastfeeding.

#### IV. Input data

**Table S4.1.** Input data for quintile-specific vaccine and treatment coverage rates, risk and prognostic factor prevalence, and total fertility rate for 41 low- and middle-income countries.

| Country      | Quintile | MCV cover age | DPT2 cover age | DPT3 cover age | Among children under 5 with fever, percentage for whom advice or treatment was sought from a health facility or provider | Among children under 5 with acute respiratory infection, percentage for whom advice or treatment was sought from a health facility or provider | Percentage of children with diarrhoea for whom advice or treatment was sought from a health facility or provider | Weight-for-height (wasting) z-score < -3SD | Weight-for-age (underweight) z-score < -3SD | Height-per-age (stunting) z-score < -3SD |
|--------------|----------|---------------|----------------|----------------|--------------------------------------------------------------------------------------------------------------------------|------------------------------------------------------------------------------------------------------------------------------------------------|------------------------------------------------------------------------------------------------------------------|--------------------------------------------|---------------------------------------------|------------------------------------------|
| Armenia      | 1        | 94.6          | 91.3           | 88.3           | NA                                                                                                                       | NA                                                                                                                                             | NA                                                                                                               | 3.3                                        | 2                                           | 11                                       |
| Armenia      | 2        | 99.1          | 100            | 99.1           | NA                                                                                                                       | NA                                                                                                                                             | NA                                                                                                               | 2                                          | 2                                           | 7.5                                      |
| Armenia      | 3        | 96.8          | 94.2           | 94.2           | NA                                                                                                                       | NA                                                                                                                                             | NA                                                                                                               | 1.5                                        | 1.6                                         | 8.8                                      |
| Armenia      | 4        | 94.1          | 96.1           | 96.1           | NA                                                                                                                       | NA                                                                                                                                             | NA                                                                                                               | 2.2                                        | 0.2                                         | 5.3                                      |
| Armenia      | 5        | 91.8          | 99.1           | 96.9           | NA                                                                                                                       | NA                                                                                                                                             | NA                                                                                                               | 0.1                                        | 0.1                                         | 8.3                                      |
| Bangladesh   | 1        | 79.2          | 93.1           | 90.3           | 22                                                                                                                       | 25                                                                                                                                             | 20                                                                                                               | 4.5                                        | 16.6                                        | 24.5                                     |
| Bangladesh   | 2        | 87.5          | 92.8           | 90.1           | 21                                                                                                                       | 30                                                                                                                                             | 17                                                                                                               | 4.1                                        | 11.3                                        | 16.9                                     |
| Bangladesh   | 3        | 88.1          | 96             | 93.2           | 26                                                                                                                       | 29                                                                                                                                             | 22                                                                                                               | 3.9                                        | 11.5                                        | 14.1                                     |
| Bangladesh   | 4        | 90.4          | 97.5           | 96.3           | 30                                                                                                                       | 46                                                                                                                                             | 25                                                                                                               | 3.4                                        | 6.3                                         | 11.2                                     |
| Bangladesh   | 5        | 93.6          | 99.3           | 97.8           | 43                                                                                                                       | 58                                                                                                                                             | 49                                                                                                               | 3.7                                        | 3.9                                         | 6.4                                      |
| Benin        | 1        | 53.7          | 67.7           | 58.7           | 28                                                                                                                       | 20                                                                                                                                             | 27                                                                                                               | 10.8                                       | 23.1                                        | 33.6                                     |
| Benin        | 2        | 62.7          | 75.9           | 67.6           | 37                                                                                                                       | 29                                                                                                                                             | 36                                                                                                               | 6.4                                        | 17                                          | 27.6                                     |
| Benin        | 3        | 71.9          | 84.1           | 76             | 38                                                                                                                       | 45                                                                                                                                             | 40                                                                                                               | 9.6                                        | 19                                          | 29.3                                     |
| Benin        | 4        | 76.7          | 88.3           | 80.2           | 39                                                                                                                       | 31                                                                                                                                             | 45                                                                                                               | 5.2                                        | 15.9                                        | 32.3                                     |
| Benin        | 5        | 84.7          | 91.6           | 85.6           | 47                                                                                                                       | 31                                                                                                                                             | 37                                                                                                               | 7.1                                        | 9.3                                         | 20.4                                     |
| Burkina Faso | 1        | 78.1          | 88.3           | 83.4           | 42                                                                                                                       | 36                                                                                                                                             | 36                                                                                                               | 6.7                                        | 11.1                                        | 19                                       |
| Burkina Faso | 2        | 86            | 91.6           | 97.9           | 46                                                                                                                       | 43                                                                                                                                             | 41                                                                                                               | 5.7                                        | 8.3                                         | 17.5                                     |
| Burkina Faso | 3        | 89.3          | 93.6           | 91.6           | 57                                                                                                                       | 66                                                                                                                                             | 47                                                                                                               | 6.1                                        | 7.4                                         | 16.5                                     |
| Burkina Faso | 4        | 91.7          | 95.8           | 92.5           | 59                                                                                                                       | 56                                                                                                                                             | 57                                                                                                               | 5.1                                        | 6.2                                         | 11.5                                     |
| Burkina Faso | 5        | 92.5          | 95             | 92.9           | 68                                                                                                                       | 70                                                                                                                                             | 56                                                                                                               | 4.8                                        | 3.7                                         | 5.4                                      |
| Burundi      | 1        | 91.2          | 96.5           | 94.4           | 57                                                                                                                       | 52                                                                                                                                             | 57                                                                                                               | 1.1                                        | 13.3                                        | 36.3                                     |
| Burundi      | 2        | 94.1          | 98.2           | 95.2           | 64                                                                                                                       | 53                                                                                                                                             | 58                                                                                                               | 1.1                                        | 8.4                                         | 28.6                                     |
| Burundi      | 3        | 94.7          | 99.4           | 95.9           | 63                                                                                                                       | 59                                                                                                                                             | 61                                                                                                               | 1.6                                        | 7.8                                         | 27.2                                     |
| Burundi      | 4        | 95.8          | 98.8           | 96.9           | 62                                                                                                                       | 53                                                                                                                                             | 51                                                                                                               | 1.4                                        | 6                                           | 24.8                                     |
| Burundi      | 5        | 96.2          | 96.9           | 94.2           | 67                                                                                                                       | 58                                                                                                                                             | 62                                                                                                               | 1.6                                        | 2.7                                         | 17.1                                     |
| Cambodia     | 1        | 65.9          | 81.1           | 71.6           | 62                                                                                                                       | 68                                                                                                                                             | 62                                                                                                               | 2.8                                        | 7.1                                         | 14.1                                     |
| Cambodia     | 2        | 71.7          | 86.7           | 78.3           | 67                                                                                                                       | 65                                                                                                                                             | 54                                                                                                               | 2.3                                        | 5.7                                         | 9.8                                      |
| Cambodia     | 3        | 77.7          | 91             | 82.5           | 56                                                                                                                       | 78                                                                                                                                             | 58                                                                                                               | 2.1                                        | 4.3                                         | 7.8                                      |
| Cambodia     | 4        | 87.6          | 98             | 94.3           | 59                                                                                                                       | 67                                                                                                                                             | 56                                                                                                               | 2.5                                        | 3.5                                         | 6.9                                      |
| Cambodia     | 5        | 94.7          | 98.9           | 96.2           | 59                                                                                                                       | 67                                                                                                                                             | 44                                                                                                               | 1.9                                        | 1.7                                         | 4.1                                      |
| Cameroon     | 1        | 51.6          | 57.1           | 43.9           | 11                                                                                                                       | 9                                                                                                                                              | 14                                                                                                               | 4                                          | 10.9                                        | 26.1                                     |
| Cameroon     | 2        | 66            | 76.2           | 65.6           | 24                                                                                                                       | 38                                                                                                                                             | 21                                                                                                               | 2.1                                        | 6.5                                         | 18                                       |
| Cameroon     | 3        | 75.8          | 85.2           | 73.8           | 32                                                                                                                       | 41                                                                                                                                             | 28                                                                                                               | 1.4                                        | 1.8                                         | 11.6                                     |
| Cameroon     | 4        | 78.4          | 85.3           | 77.7           | 34                                                                                                                       | 35                                                                                                                                             | 30                                                                                                               | 0.9                                        | 1.6                                         | 8.8                                      |
| Cameroon     | 5        | 86.3          | 93             | 87.4           | 43                                                                                                                       | 39                                                                                                                                             | 37                                                                                                               | 0.5                                        | 0.4                                         | 2.8                                      |
| Chad         | 1        | 52.7          | 41.5           | 27.2           | 12.6                                                                                                                     | 15.7                                                                                                                                           | 17.2                                                                                                             | 3.7                                        | 10.4                                        | 24.6                                     |
| Chad         | 2        | 55.4          | 46.7           | 32.4           | 18.5                                                                                                                     | 20.9                                                                                                                                           | 21.1                                                                                                             | 3.8                                        | 10.5                                        | 21.7                                     |
| Chad         | 3        | 58.1          | 46.1           | 31.3           | 21.1                                                                                                                     | 23.5                                                                                                                                           | 26.2                                                                                                             | 5.4                                        | 12.5                                        | 22.9                                     |
| Chad         | 4        | 53.2          | 46.3           | 33.2           | 25                                                                                                                       | 30.7                                                                                                                                           | 28.8                                                                                                             | 4.2                                        | 13.4                                        | 24.8                                     |

|               |   |      |      |      |      |      |      |     |      |      |
|---------------|---|------|------|------|------|------|------|-----|------|------|
| Chad          | 5 | 67.4 | 64.7 | 44.7 | 38.6 | 44.3 | 37.7 | 3.6 | 8.4  | 13.3 |
| Comoros       | 1 | 62.5 | 67   | 57.5 | 40   | NA   | 42   | 5.6 | 6.7  | 18.2 |
| Comoros       | 2 | 70.1 | 75.6 | 65.9 | 39   | NA   | 35   | 3.8 | 4.9  | 17.4 |
| Comoros       | 3 | 83.2 | 84.9 | 80.5 | 43   | NA   | 39   | 3.6 | 2.6  | 11.4 |
| Comoros       | 4 | 83.6 | 88.2 | 82.5 | 52   | NA   | 49   | 3.4 | 4.1  | 13.9 |
| Comoros       | 5 | 79.8 | 84.6 | 81.7 | 50   | NA   | 33   | 1.8 | 2.1  | 8.8  |
| DRC           | 1 | 61.8 | 61   | 48   | 37   | 37   | 37   | 3   | 9.9  | 28.8 |
| DRC           | 2 | 67.3 | 65.8 | 50.7 | 45   | 40   | 45   | 3.3 | 9.5  | 26.1 |
| DRC           | 3 | 72.6 | 72.9 | 56.5 | 37   | 49   | 42   | 3   | 7.1  | 23.5 |
| DRC           | 4 | 75.2 | 81.9 | 69.8 | 39   | 39   | 38   | 2.2 | 5.9  | 1    |
| DRC           | 5 | 84.3 | 92.4 | 83   | 42   | 44   | 33   | 1.2 | 1.6  | 9    |
| Congo         | 1 | 58.8 | 69.5 | 56.4 | 40   | 41   | 32   | 2   | 4    | 13.1 |
| Congo         | 2 | 70.1 | 76.9 | 66.4 | 45   | 49   | 33   | 2.2 | 3.5  | 8.6  |
| Congo         | 3 | 80.1 | 88.6 | 74.1 | 44   | 41   | 30   | 1.3 | 1.9  | 7.8  |
| Congo         | 4 | 84.9 | 90.6 | 85.1 | 47   | 66   | 37   | 1   | 0.9  | 5.6  |
| Congo         | 5 | 87.1 | 94.1 | 83.8 | 61   | 71   | 53   | 0.9 | 0.7  | 2.1  |
| Cote d'Ivoire | 1 | 53.9 | 62.5 | 52.1 | 22   | 18   | 19   | 1.6 | 6    | 19.4 |
| Cote d'Ivoire | 2 | 56.8 | 67.5 | 60.4 | 34   | 30   | 34   | 2   | 2.6  | 13.1 |
| Cote d'Ivoire | 3 | 65   | 68   | 58.1 | 34   | 50   | 23   | 1.5 | 3    | 10.9 |
| Cote d'Ivoire | 4 | 69   | 79.9 | 73.9 | 41   | 48   | 32   | 1.6 | 3    | 8.1  |
| Cote d'Ivoire | 5 | 83.1 | 84.3 | 80.7 | 42   | 42   | 29   | 1.8 | 1    | 4.9  |
| Ethiopia      | 1 | 45.3 | 42.4 | 26   | 16   | 16   | 22   | 3.3 | 12   | 25.5 |
| Ethiopia      | 2 | 52   | 45.2 | 29.4 | 21   | 25   | 25   | 4.1 | 11.1 | 23.1 |
| Ethiopia      | 3 | 52   | 47.1 | 31   | 23   | 22   | 35   | 2.5 | 8.7  | 21.8 |
| Ethiopia      | 4 | 56.4 | 56.6 | 42.2 | 28   | 33   | 33   | 2.1 | 5.9  | 17.4 |
| Ethiopia      | 5 | 79.7 | 78.3 | 61.5 | 40   | 62   | 53   | 1.6 | 4.9  | 12   |
| Gambia        | 1 | 93   | 95.5 | 90   | 66   | 70   | 67   | 3.4 | 4.4  | 10.7 |
| Gambia        | 2 | 89.4 | 95.8 | 88.1 | 60   | 70   | 71   | 4.3 | 4.6  | 9.4  |
| Gambia        | 3 | 89.3 | 94.8 | 88.3 | 63   | 71   | 67   | 5.8 | 4    | 8.8  |
| Gambia        | 4 | 89.4 | 92.9 | 88.5 | 67   | 62   | 66   | 4.1 | 3.9  | 7.4  |
| Gambia        | 5 | 76.2 | 97.7 | 82.7 | 70   | 67   | 66   | 3.5 | 2.1  | 3.7  |
| Ghana         | 1 | 86.5 | 95.1 | 87.4 | 55   | NA   | 54   | 1.1 | 2.7  | 7.6  |
| Ghana         | 2 | 89.5 | 94.4 | 86.5 | 53   | NA   | 47   | 0.9 | 1.9  | 8.2  |
| Ghana         | 3 | 89.3 | 94.7 | 88.6 | 62   | NA   | 34   | 0.5 | 1    | 4.2  |
| Ghana         | 4 | 88.9 | 94.9 | 88.8 | 57   | NA   | 41   | 0.3 | 1.3  | 2.2  |
| Ghana         | 5 | 92.9 | 98.5 | 91.9 | 54   | NA   | 46   | 0.4 | 1.3  | 1.3  |
| Guinea        | 1 | 44.1 | 48.5 | 32.4 | 21   | 14.5 | 27   | 5.4 | 7.1  | 15.3 |
| Guinea        | 2 | 64.6 | 61.8 | 52.7 | 27   | 30.6 | 30   | 3.2 | 7.4  | 19.7 |
| Guinea        | 3 | 59.6 | 61.7 | 51.6 | 31   | 34   | 38   | 4.3 | 5.7  | 14   |
| Guinea        | 4 | 66.4 | 67   | 54.5 | 43   | 48   | 43   | 2.9 | 3.1  | 10.7 |
| Guinea        | 5 | 80.2 | 78.2 | 62.2 | 60   | 77.7 | 55   | 1.6 | 0.6  | 5.1  |
| Haiti         | 1 | 65   | 69.4 | 54.7 | 28   | 22.9 | 28   | 1   | 4.3  | 12.9 |
| Haiti         | 2 | 64.2 | 76.1 | 62.7 | 32   | 31.8 | 27   | 1.4 | 3.2  | 9.3  |
| Haiti         | 3 | 69.2 | 78.8 | 66.9 | 44   | 36   | 34   | 1.1 | 3    | 5.9  |
| Haiti         | 4 | 62.9 | 81.5 | 62.5 | 49   | 52.1 | 39   | 1.9 | 2.8  | 5.1  |
| Haiti         | 5 | 62.8 | 90.2 | 67.9 | 54   | 51.2 | 49   | 0.4 | 1.3  | 2.1  |
| Honduras      | 1 | 90   | 97.7 | 95.8 | 60   | 61.1 | 52   | 0.4 | 2.6  | 14.5 |
| Honduras      | 2 | 87.6 | 97.1 | 94.7 | 56   | 60.2 | 53   | 0.2 | 1.1  | 5.6  |
| Honduras      | 3 | 86.2 | 95.4 | 92.7 | 62   | 67   | 49   | 0.5 | 0.6  | 3.1  |
| Honduras      | 4 | 84.9 | 97.2 | 95.7 | 69   | 65.3 | 54   | 0.1 | 0.3  | 1.7  |
| Honduras      | 5 | 89.8 | 99.3 | 98.1 | 64   | 72.6 | 52   | 0.2 | 0.4  | 1    |



|                 |   |      |      |      |      |      |      |      |      |      |
|-----------------|---|------|------|------|------|------|------|------|------|------|
| Indonesia       | 1 | 80   | 87   | 79.9 | 65.6 | 60.7 | 62.8 | 2.8  | 7.1  | 14.1 |
| Indonesia       | 2 | 83.9 | 93.9 | 86.8 | 73.9 | 83.7 | 65.9 | 2.3  | 5.7  | 9.8  |
| Indonesia       | 3 | 93.2 | 97.2 | 95.5 | 73.5 | 80.3 | 67.3 | 2.1  | 4.3  | 7.8  |
| Indonesia       | 4 | 86.2 | 95.7 | 91.3 | 77.1 | 86.8 | 65   | 2.5  | 3.5  | 6.9  |
| Indonesia       | 5 | 90.4 | 96.3 | 95.2 | 79.1 | 71   | 61.5 | 1.9  | 1.7  | 4.1  |
| Kenya           | 1 | 76.4 | 91.7 | 83.3 | 60   | 63   | 61   | 1.6  | 4.2  | 12.3 |
| Kenya           | 2 | 86.9 | 97.7 | 90.1 | 63   | 67   | 58   | 0.8  | 2.7  | 9.5  |
| Kenya           | 3 | 88.3 | 97.2 | 92   | 60   | 65   | 56   | 0.8  | 1.9  | 7.4  |
| Kenya           | 4 | 94.5 | 98.7 | 93.7 | 63   | 63   | 55   | 0.6  | 1.1  | 6.2  |
| Kenya           | 5 | 93.1 | 95.2 | 92.7 | 69   | 74   | 56   | 0.6  | 0.8  | 3.3  |
| Kyrgyz Republic | 1 | 99.1 | 98   | 92.2 | NA   | NA   | NA   | 1.6  | 1.6  | 7.7  |
| Kyrgyz Republic | 2 | 98   | 98   | 93   | NA   | NA   | NA   | 0.9  | 0.6  | 4.7  |
| Kyrgyz Republic | 3 | 97.2 | 94.2 | 87.1 | NA   | NA   | NA   | 1.3  | 1.2  | 6.2  |
| Kyrgyz Republic | 4 | 92.8 | 90.4 | 79.9 | NA   | NA   | NA   | 1    | 0.6  | 4.8  |
| Kyrgyz Republic | 5 | 95.7 | 95.7 | 75   | NA   | NA   | NA   | 0.8  | 0.4  | 5.3  |
| Lesotho         | 1 | 87.6 | 95   | 83.7 | 61.5 | 59.9 | 58.9 | 1.2  | 3.6  | 15.5 |
| Lesotho         | 2 | 85.3 | 94.3 | 80.9 | 59.2 | 66.5 | 51.9 | 0.9  | 2.6  | 15.8 |
| Lesotho         | 3 | 97.1 | 96.1 | 93.5 | 57.1 | 63.4 | 43.1 | 0.3  | 0.2  | 9.8  |
| Lesotho         | 4 | 91   | 93.6 | 88   | 70.1 | 63.4 | 45.2 | 0.1  | 1.2  | 9.1  |
| Lesotho         | 5 | 89.7 | 96.5 | 79.7 | 53.2 | 63.4 | 54.6 | 0    | 0    | 2    |
| Liberia         | 1 | 65   | 72.1 | 57.9 | 50.6 | 48.3 | 43.2 | 2.6  | 5.4  | 15.9 |
| Liberia         | 2 | 74.1 | 81.5 | 71.7 | 57.2 | 56.4 | 46.8 | 2.1  | 5.7  | 16.3 |
| Liberia         | 3 | 73   | 87.4 | 73.6 | 60.9 | 59.7 | 53.6 | 2    | 4.3  | 12.7 |
| Liberia         | 4 | 78.1 | 87.9 | 78.3 | 61.2 | 44.3 | 44.2 | 1.6  | 2    | 7.7  |
| Liberia         | 5 | 84.1 | 83.8 | 79.4 | 62.2 | 44   | 49.2 | 1.7  | 3.8  | 5.9  |
| Malawi          | 1 | 90.2 | 94.9 | 91.3 | 60.8 | 61.8 | 63.8 | 2.8  | 4.5  | 24.1 |
| Malawi          | 2 | 92.5 | 96.6 | 93.3 | 61   | 66.8 | 63.2 | 1.8  | 4.5  | 22.3 |
| Malawi          | 3 | 91.5 | 95.6 | 92   | 68.3 | 76.8 | 60.5 | 1.9  | 3    | 19.8 |
| Malawi          | 4 | 96   | 96.7 | 94.8 | 63.4 | 71.5 | 64.5 | 0.4  | 1.9  | 18   |
| Malawi          | 5 | 95.9 | 96.7 | 94.3 | 71.6 | 75.2 | 58.2 | 0.5  | 1    | 13.5 |
| Mali            | 1 | 61.8 | 63.6 | 47.6 | 18.4 | 18.4 | 19.1 | 6.3  | 13.5 | 26.4 |
| Mali            | 2 | 68.6 | 70.4 | 57.6 | 28.4 | 25   | 31.9 | 6.2  | 12.8 | 21.5 |
| Mali            | 3 | 68.9 | 72.2 | 61.4 | 23.6 | 30.2 | 25.8 | 6    | 10.1 | 21   |
| Mali            | 4 | 76.8 | 80.3 | 71.5 | 33.8 | 45   | 39.4 | 3.3  | 5.1  | 17.5 |
| Mali            | 5 | 82.9 | 86.1 | 77.6 | 67   | 53.1 | 41.3 | 3.6  | 2.5  | 8.1  |
| Mozambique      | 1 | 74.8 | 76.6 | 64.9 | 47.6 | 44.1 | 50   | 3.7  | 7.5  | 25.7 |
| Mozambique      | 2 | 74.9 | 81.7 | 70.2 | 42.7 | 39.4 | 47.9 | 2.1  | 4.4  | 24.5 |
| Mozambique      | 3 | 79.3 | 89.1 | 79.2 | 59.5 | NA   | 59.1 | 2.1  | 4.1  | 21.8 |
| Mozambique      | 4 | 91   | 94.3 | 85.3 | 69.7 | 51.4 | 62.8 | 1.2  | 1.7  | 14.9 |
| Mozambique      | 5 | 92.9 | 92.8 | 87.1 | 68   | 66.8 | 63.2 | 1.2  | 1.6  | 7.4  |
| Nepal           | 1 | 86   | 91.8 | 87.6 | 29.8 | NA   | 32.7 | 2.3  | 10.5 | 25.2 |
| Nepal           | 2 | 85.2 | 93.5 | 89.7 | 38.2 | NA   | 38.7 | 2.3  | 8.7  | 20   |
| Nepal           | 3 | 85.2 | 94.4 | 90.5 | 44.7 | NA   | 38.9 | 3    | 8.2  | 12.9 |
| Nepal           | 4 | 92.2 | 96.7 | 96.7 | 50.1 | NA   | 44.1 | 3.5  | 6.1  | 10.2 |
| Nepal           | 5 | 96.1 | 99.5 | 98.4 | 46.4 | NA   | 37.1 | 2    | 2    | 6.5  |
| Niger           | 1 | 58.7 | 62.8 | 52.9 | 60.5 | 35.1 | 41.2 | 10.8 | 23.1 | 33.6 |

|              |   |      |      |      |      |       |      |      |      |      |
|--------------|---|------|------|------|------|-------|------|------|------|------|
| Niger        | 2 | 62.4 | 71.1 | 58.9 | 54.2 | 40.5  | 57.5 | 6.4  | 17   | 27.6 |
| Niger        | 3 | 61.7 | 74.4 | 62.6 | 72.4 | 61.7  | 54.6 | 9.6  | 19   | 29.3 |
| Niger        | 4 | 72.4 | 82.8 | 70.5 | 80.1 | 50.8  | 50.6 | 5.2  | 15.9 | 32.3 |
| Niger        | 5 | 78.1 | 92.6 | 88.9 | 81.7 | 82.1  | 56.5 | 7.1  | 9.3  | 20.4 |
| Nigeria      | 1 | 13.2 | 10.9 | 7    | 25   | 27    | 19   | 10.5 | 17.3 | 33.8 |
| Nigeria      | 2 | 26.6 | 26.4 | 18.5 | 29   | 28    | 28   | 10.2 | 15.6 | 28.5 |
| Nigeria      | 3 | 43.9 | 49.5 | 39.7 | 30   | 41    | 32   | 8.5  | 10.3 | 19.3 |
| Nigeria      | 4 | 60.6 | 68.5 | 60   | 35   | 37    | 38   | 7.6  | 7.9  | 12.2 |
| Nigeria      | 5 | 77.9 | 86.7 | 79.5 | 44   | 64    | 38   | 5.9  | 5.4  | 7.9  |
| Pakistan     | 1 | 35.1 | 40.9 | 29.9 | 56   | 57    | 54   | 4.5  | 19.4 | 38.4 |
| Pakistan     | 2 | 60.6 | 73.5 | 67.1 | 57   | 58    | 55   | 3.2  | 12   | 30.7 |
| Pakistan     | 3 | 62.5 | 77.2 | 69.2 | 63   | 60    | 59   | 4    | 6    | 19.6 |
| Pakistan     | 4 | 72.1 | 85   | 78.8 | 73   | 74    | 68   | 1.8  | 5.9  | 16.6 |
| Pakistan     | 5 | 82.8 | 93.7 | 88   | 79   | 79    | 77   | 2.9  | 3    | 10   |
| Rwanda       | 1 | 94   | 98   | 95.6 | 51   | 53    | 37.9 | 0.9  | 3.2  | 23.5 |
| Rwanda       | 2 | 93   | 97.1 | 95.7 | 53   | 64    | 54   | 1    | 2.5  | 20.4 |
| Rwanda       | 3 | 94.9 | 97.8 | 97.1 | 59   | 65    | 54.6 | 0.3  | 2.6  | 17.9 |
| Rwanda       | 4 | 97   | 99.6 | 97.9 | 68   | 56    | 54.5 | 0.9  | 2    | 12.8 |
| Rwanda       | 5 | 97.4 | 99.3 | 98.7 | 69   | 86    | 57.4 | 1    | 0.8  | 7.8  |
| Senegal      | 1 | 78.2 | 91   | 85.6 | 44.2 | 48    | 30.8 | 0.7  | 4    | 8.5  |
| Senegal      | 2 | 78.6 | 92.8 | 89.4 | 42.5 | 38.8  | 37.2 | 0.6  | 2.7  | 5.6  |
| Senegal      | 3 | 79   | 91.2 | 86.7 | 43.7 | 45.05 | 30.4 | 0.9  | 1.8  | 4.3  |
| Senegal      | 4 | 83.2 | 96.2 | 95.3 | 42.3 | 51.3  | 24.8 | 1    | 1.1  | 4    |
| Senegal      | 5 | 83.5 | 99.2 | 91.6 | 56.4 | 28.4  | 42.2 | 0.5  | 0.4  | 1.6  |
| Sierra Leone | 1 | 81.4 | 89.6 | 78.6 | 65.2 | 67.7  | 63.8 | 3.6  | 6.2  | 22.5 |
| Sierra Leone | 2 | 77.5 | 86.4 | 77.3 | 66.6 | 71.9  | 55.6 | 5    | 6.9  | 21.1 |
| Sierra Leone | 3 | 76.4 | 87.8 | 79.1 | 70.2 | 75.3  | 74.1 | 4.2  | 5.3  | 17.7 |
| Sierra Leone | 4 | 78.4 | 92.7 | 80.5 | 67.4 | 70.1  | 66.6 | 3.5  | 5    | 16   |
| Sierra Leone | 5 | 79   | 86.7 | 72.3 | 56.4 | 75.1  | 68.2 | 3.3  | 3    | 10.2 |
| Tajikistan   | 1 | 92.7 | 96.4 | 92.9 | 47.9 | NA    | 48.1 | 5.2  | 4.5  | 12   |
| Tajikistan   | 2 | 97.7 | 97.8 | 95.6 | 51.6 | NA    | 45.8 | 3.4  | 4.8  | 10.1 |
| Tajikistan   | 3 | 95   | 94.8 | 92.7 | 62.1 | NA    | 65.9 | 3    | 2.3  | 7.3  |
| Tajikistan   | 4 | 96   | 93.7 | 91.9 | 67.6 | NA    | 58.5 | 4.3  | 3.9  | 9.9  |
| Tajikistan   | 5 | 94.4 | 94.1 | 91.6 | 63.3 | NA    | 53.1 | 3.4  | 2.7  | 9.2  |
| Tanzania     | 1 | 79.9 | 90.6 | 84.1 | 58   | NA    | 52   | 1.7  | 6.4  | 20.4 |
| Tanzania     | 2 | 82.1 | 91   | 84.1 | 62   | NA    | 54   | 0.9  | 4.8  | 19.5 |
| Tanzania     | 3 | 79.8 | 91.6 | 87.3 | 61   | NA    | 45   | 1.3  | 2.9  | 16.5 |
| Tanzania     | 4 | 90.9 | 95.2 | 91.3 | 66   | NA    | 53   | 0.9  | 2.2  | 13.7 |
| Tanzania     | 5 | 93.8 | 97.7 | 96.9 | 81   | NA    | 63   | 1.4  | 1.2  | 8.9  |
| Timor-Leste  | 1 | 53.7 | 60.9 | 54.8 | 59   | NA    | 66   | 8.8  | 18.9 | 37.3 |
| Timor-Leste  | 2 | 63.7 | 66.2 | 62.5 | 69   | NA    | 70   | 6.7  | 17.3 | 40.8 |
| Timor-Leste  | 3 | 71   | 71.9 | 68.3 | 77   | NA    | 78   | 7.6  | 17.3 | 36.1 |
| Timor-Leste  | 4 | 78   | 79   | 75.8 | 73   | NA    | 68   | 6.5  | 13.1 | 28.6 |
| Timor-Leste  | 5 | 74.7 | 80.3 | 72.5 | 83   | NA    | 78   | 5.1  | 9.6  | 20.2 |
| Togo         | 1 | 74.8 | 89.2 | 84   | 36   | 41.7  | 35   | 1.8  | 5.1  | 12.7 |
| Togo         | 2 | 67.6 | 84.5 | 77.7 | 32   | 51.8  | 23   | 1.3  | 5.2  | 13.6 |
| Togo         | 3 | 67.5 | 84.9 | 78.6 | 34   | 39.9  | 23   | 1.7  | 3.5  | 13.5 |
| Togo         | 4 | 78   | 92.8 | 83.1 | 44   | 47.8  | 33   | 1.9  | 2.6  | 6.2  |
| Togo         | 5 | 83.4 | 95.1 | 90.9 | 56   | 69.1  | 40   | 0.5  | 1    | 1.9  |
| Uganda       | 1 | 75.1 | 87.7 | 73.8 | 79   | 78    | 74   | 1.3  | 5.8  | 18.9 |
| Uganda       | 2 | 72.1 | 88.2 | 71.6 | 79   | 79    | 73   | 2    | 3.2  | 12.5 |

|          |   |      |      |      |    |    |    |     |      |      |
|----------|---|------|------|------|----|----|----|-----|------|------|
| Uganda   | 3 | 74.1 | 80.8 | 66   | 82 | 78 | 74 | 1   | 0.4  | 18.4 |
| Uganda   | 4 | 76.4 | 83.6 | 70.6 | 78 | 77 | 73 | 2   | 2    | 11.7 |
| Uganda   | 5 | 81.6 | 86   | 74.7 | 85 | 82 | 67 | 1   | 1.3  | 5.5  |
| Yemen    | 1 | 51.8 | 57.1 | 42.4 | 28 | 31 | 29 | 7.7 | 23.6 | 33.2 |
| Yemen    | 2 | 58.9 | 66.6 | 54.3 | 31 | 32 | 32 | 5.4 | 15.8 | 28.8 |
| Yemen    | 3 | 63.7 | 68.8 | 57.9 | 33 | 35 | 33 | 3.9 | 12.4 | 24.7 |
| Yemen    | 4 | 69.6 | 74   | 66.7 | 39 | 35 | 34 | 4.2 | 8.1  | 15.3 |
| Yemen    | 5 | 77.1 | 89.1 | 83.7 | 39 | 42 | 40 | 4.2 | 4.8  | 8.1  |
| Zambia   | 1 | 80.9 | 89   | 79.3 | 69 | 67 | 63 | 2.9 | 4.4  | 22.1 |
| Zambia   | 2 | 80.6 | 91.6 | 83.4 | 73 | 66 | 67 | 1.7 | 3.5  | 17.2 |
| Zambia   | 3 | 85.3 | 93   | 85.1 | 71 | 67 | 68 | 1.9 | 2.7  | 17   |
| Zambia   | 4 | 90   | 98.1 | 92.4 | 75 | 75 | 67 | 2.5 | 2.8  | 16.2 |
| Zambia   | 5 | 92.7 | 98   | 95.1 | 75 | 80 | 62 | 1.7 | 1.5  | 10.8 |
| Zimbabwe | 1 | 77.7 | 78.6 | 66.7 | 38 | 52 | 37 | 0.9 | 2.2  | 12.8 |
| Zimbabwe | 2 | 74.6 | 75.8 | 71.2 | 44 | 44 | 35 | 0.8 | 2.4  | 11.3 |
| Zimbabwe | 3 | 73.5 | 81.1 | 70.1 | 38 | 54 | 30 | 0.3 | 2.3  | 12.9 |
| Zimbabwe | 4 | 86.9 | 85   | 78.8 | 29 | 48 | 37 | 0.8 | 1.2  | 8.6  |
| Zimbabwe | 5 | 83.7 | 85.3 | 79.4 | 33 | NA | 40 | 0.3 | 0.6  | 6.1  |

| Country      | Quintile | Weight-for-height (wasting) z-score < -2SD | Weight-for-age (underweight) z-score < -2SD | Height-for-age (stunting) z-score < -2SD | Among children age 6-59 months, percentage given vitA supplements in past six months | Among age 6-23, percentage who consumed foods rich in vitA in the past 24 hours | Exclusive breastfeeding - median duration (months) breastfeeding in the past 3 years | Predominant breastfeeding - median duration (months) breastfeeding in the past 3 years | Low birth weight (<2500g), percent of births low weight | Percentage of children whose stools were disposed of safely | Total fertility rate |
|--------------|----------|--------------------------------------------|---------------------------------------------|------------------------------------------|--------------------------------------------------------------------------------------|---------------------------------------------------------------------------------|--------------------------------------------------------------------------------------|----------------------------------------------------------------------------------------|---------------------------------------------------------|-------------------------------------------------------------|----------------------|
| Armenia      | 1        | 7.8                                        | 7.9                                         | 26.2                                     | NA                                                                                   | 66.9                                                                            | 76.8 (percentage)                                                                    | NA                                                                                     | 8.9                                                     | 73.0                                                        | 1.8                  |
| Armenia      | 2        | 3.8                                        | 5.2                                         | 16.0                                     | NA                                                                                   | 67.1                                                                            | 82.7 (percentage)                                                                    | NA                                                                                     | 5.9                                                     | 82.2                                                        | 1.8                  |
| Armenia      | 3        | 0.5                                        | 5.5                                         | 19.3                                     | NA                                                                                   | 79.5                                                                            | 77.1 (percentage)                                                                    | NA                                                                                     | 6.8                                                     | 91.2                                                        | 1.6                  |
| Armenia      | 4        | 3.7                                        | 2.9                                         | 16.3                                     | NA                                                                                   | 80.4                                                                            | 68.7 (percentage)                                                                    | NA                                                                                     | 5.9                                                     | 87.2                                                        | 1.8                  |
| Armenia      | 5        | 1.2                                        | 1.5                                         | 18.6                                     | NA                                                                                   | 79.6                                                                            | 79.4 (percentage)                                                                    | NA                                                                                     | 6.1                                                     | 87.3                                                        | 1.5                  |
| Bangladesh   | 1        | 17.5                                       | 50.3                                        | 53.7                                     | 55.2                                                                                 | 53.2                                                                            | 3.0                                                                                  | 5.3                                                                                    | 19.3                                                    | 19.6                                                        | 3.1                  |
| Bangladesh   | 2        | 16.2                                       | 41.6                                        | 45.4                                     | 56.5                                                                                 | 60.6                                                                            | 3.2                                                                                  | 4.4                                                                                    | 19.3                                                    | 24.1                                                        | 2.5                  |
| Bangladesh   | 3        | 17.7                                       | 36.0                                        | 40.7                                     | 60.8                                                                                 | 69.6                                                                            | 3.6                                                                                  | 5.1                                                                                    | 18.0                                                    | 31.7                                                        | 2.2                  |
| Bangladesh   | 4        | 13.6                                       | 27.5                                        | 35.9                                     | 64.1                                                                                 | 68.3                                                                            | 4.2                                                                                  | 5.0                                                                                    | 15.6                                                    | 49.8                                                        | 2.1                  |
| Bangladesh   | 5        | 12.1                                       | 20.9                                        | 25.7                                     | 62.3                                                                                 | 69.6                                                                            | 3.5                                                                                  | 4.7                                                                                    | 15.2                                                    | 73.1                                                        | 1.9                  |
| Benin        | 1        | 24.3                                       | 47.3                                        | 55.7                                     | 37.6                                                                                 | 45.2                                                                            | 0.6                                                                                  | 3.2                                                                                    | 14.0                                                    | 10.5                                                        | 6.1                  |
| Benin        | 2        | 20.8                                       | 45.7                                        | 53.4                                     | 44.8                                                                                 | 49.4                                                                            | 0.6                                                                                  | 3.0                                                                                    | 15.0                                                    | 13.4                                                        | 5.4                  |
| Benin        | 3        | 21.2                                       | 43.0                                        | 48.3                                     | 48.2                                                                                 | 55.2                                                                            | 1.3                                                                                  | 4.4                                                                                    | 12.8                                                    | 26.6                                                        | 5.1                  |
| Benin        | 4        | 16.7                                       | 40.2                                        | 54.6                                     | 52.6                                                                                 | 54.9                                                                            | 0.7                                                                                  | 3.4                                                                                    | 11.4                                                    | 60.1                                                        | 4.6                  |
| Benin        | 5        | 16.5                                       | 32.7                                        | 45.1                                     | 61.1                                                                                 | 63.0                                                                            | 1.5                                                                                  | 2.8                                                                                    | 11.3                                                    | 90.3                                                        | 3.9                  |
| Burkina Faso | 1        | 17.3                                       | 31.7                                        | 41.9                                     | 53.8                                                                                 | 31.4                                                                            | 0.6                                                                                  | 7.0                                                                                    | 14.8                                                    | 3.5                                                         | 7.1                  |
| Burkina Faso | 2        | 16.2                                       | 28.5                                        | 37.0                                     | 59.9                                                                                 | 29.7                                                                            | 0.7                                                                                  | 8.0                                                                                    | 13.9                                                    | 7.4                                                         | 6.9                  |
| Burkina Faso | 3        | 15.3                                       | 26.0                                        | 37.6                                     | 67.3                                                                                 | 29.8                                                                            | 0.6                                                                                  | 7.0                                                                                    | 13.2                                                    | 11.9                                                        | 6.7                  |
| Burkina Faso | 4        | 15.5                                       | 23.8                                        | 33.2                                     | 68.9                                                                                 | 35.6                                                                            | 0.7                                                                                  | 7.0                                                                                    | 13.8                                                    | 29.0                                                        | 6.2                  |
| Burkina Faso | 5        | 11.9                                       | 15.5                                        | 18.6                                     | 65.2                                                                                 | 50.7                                                                            | 0.7                                                                                  | 6.0                                                                                    | 13.8                                                    | 82.6                                                        | 3.7                  |
| Burundi      | 1        | 7.2                                        | 40.7                                        | 70.0                                     | 80.9                                                                                 | 84.9                                                                            | 3.5                                                                                  | 6.0                                                                                    | 14.4                                                    | 77.6                                                        | 6.2                  |
| Burundi      | 2        | 6.0                                        | 30.1                                        | 59.1                                     | 79.2                                                                                 | 80.6                                                                            | 3.9                                                                                  | 6.0                                                                                    | 10.5                                                    | 80.8                                                        | 6.8                  |
| Burundi      | 3        | 5.2                                        | 29.5                                        | 59.8                                     | 78.9                                                                                 | 84.6                                                                            | 4.5                                                                                  | 6.0                                                                                    | 11.2                                                    | 80.0                                                        | 6.5                  |
| Burundi      | 4        | 5.4                                        | 25.2                                        | 56.5                                     | 80.2                                                                                 | 85.8                                                                            | 4.6                                                                                  | 6.0                                                                                    | 11.9                                                    | 81.5                                                        | 6.8                  |
| Burundi      | 5        | 5.4                                        | 17.0                                        | 41.4                                     | 85.1                                                                                 | 81.5                                                                            | 3.2                                                                                  | 5.0                                                                                    | 6.8                                                     | 85.0                                                        | 5.7                  |
| Cambodia     | 1        | 11.0                                       | 31.0                                        | 41.9                                     | 68.9                                                                                 | 82.0                                                                            | 4.3                                                                                  | 5.0                                                                                    | 10.8                                                    | 60.2                                                        | 3.8                  |
| Cambodia     | 2        | 11.4                                       | 27.5                                        | 37.1                                     | 68.9                                                                                 | 86.5                                                                            | 4.4                                                                                  | 5.0                                                                                    | 8.2                                                     | 64.3                                                        | 2.8                  |
| Cambodia     | 3        | 8.4                                        | 23.3                                        | 31.7                                     | 69.9                                                                                 | 86.8                                                                            | 3.7                                                                                  | 5.0                                                                                    | 7.3                                                     | 75.3                                                        | 2.8                  |
| Cambodia     | 4        | 9.3                                        | 22.0                                        | 29.1                                     | 73.6                                                                                 | 82.7                                                                            | 4                                                                                    | 5.0                                                                                    | 7.6                                                     | 79.8                                                        | 2.4                  |
| Cambodia     | 5        | 7.4                                        | 13.0                                        | 18.5                                     | 67.5                                                                                 | 85.7                                                                            | 1.2                                                                                  | 3.0                                                                                    | 5.6                                                     | 76.9                                                        | 2.2                  |
| Cameroon     | 1        | 10.7                                       | 29.8                                        | 48.6                                     | 60.6                                                                                 | 63.1                                                                            | 0.5                                                                                  | 6.0                                                                                    | 8.2                                                     | 54.1                                                        | 7.0                  |
| Cameroon     | 2        | 6.9                                        | 19.9                                        | 42.0                                     | 55.9                                                                                 | 69.9                                                                            | 0.5                                                                                  | 5.0                                                                                    | 7.3                                                     | 66.5                                                        | 6.4                  |
| Cameroon     | 3        | 4.8                                        | 9.4                                         | 31.0                                     | 55.4                                                                                 | 77.8                                                                            | 0.5                                                                                  | 4.0                                                                                    | 7.5                                                     | 78.6                                                        | 5.6                  |
| Cameroon     | 4        | 2.6                                        | 6.5                                         | 22.8                                     | 52.0                                                                                 | 80.1                                                                            | 0.7                                                                                  | 3.0                                                                                    | 7.2                                                     | 85.0                                                        | 4.2                  |
| Cameroon     | 5        | 2.1                                        | 3.9                                         | 12.3                                     | 51.2                                                                                 | 77.6                                                                            | 0.6                                                                                  | 3.0                                                                                    | 8.5                                                     | 92.6                                                        | 3.3                  |
| Chad         | 1        | 11.6                                       | 28.9                                        | 41.2                                     | 44.1                                                                                 | 42.3                                                                            | 3.5                                                                                  | 5.0                                                                                    | 6.7                                                     | 13.6                                                        | 7.0                  |
| Chad         | 2        | 12.6                                       | 27.3                                        | 39.8                                     | 45.4                                                                                 | 42.0                                                                            | 3                                                                                    | 5.4                                                                                    | 6.5                                                     | 16.0                                                        | 7.0                  |
| Chad         | 3        | 14.3                                       | 31.1                                        | 40.4                                     | 41.5                                                                                 | 44.8                                                                            | 2.8                                                                                  | 5.2                                                                                    | 4.8                                                     | 19.4                                                        | 6.8                  |
| Chad         | 4        | 13.4                                       | 33.2                                        | 44.7                                     | 39.7                                                                                 | 44.3                                                                            | 2.6                                                                                  | 4.8                                                                                    | 6.5                                                     | 22.9                                                        | 6.2                  |
| Chad         | 5        | 13.0                                       | 22.3                                        | 31.5                                     | 50.7                                                                                 | 56.5                                                                            | 1.9                                                                                  | 2.8                                                                                    | 8.2                                                     | 68.7                                                        | 5.3                  |
| Comoros      | 1        | 13.4                                       | 19.8                                        | 38.2                                     | 42.0                                                                                 | 71.1                                                                            | 0.4                                                                                  | 4.0                                                                                    | 12.6                                                    | 71.7                                                        | 6.7                  |
| Comoros      | 2        | 10.9                                       | 18.8                                        | 32.5                                     | 48.1                                                                                 | 63.9                                                                            | 0.4                                                                                  | 2.0                                                                                    | 16.6                                                    | 77.3                                                        | 4.6                  |
| Comoros      | 3        | 11.1                                       | 12.5                                        | 25.9                                     | 47.8                                                                                 | 69.5                                                                            | 0.5                                                                                  | 2.0                                                                                    | 19.7                                                    | 70.2                                                        | 4.2                  |
| Comoros      | 4        | 9.1                                        | 12.9                                        | 27.0                                     | 51.0                                                                                 | 78.3                                                                            | 0.6                                                                                  | 2.0                                                                                    | 15.3                                                    | 72.2                                                        | 3.5                  |
| Comoros      | 5        | 9.7                                        | 9.3                                         | 21.9                                     | 57.0                                                                                 | 75.4                                                                            | 0.5                                                                                  | 1.0                                                                                    | 16.2                                                    | 64.5                                                        | 3.4                  |
| DRC          | 1        | 8.4                                        | 29.1                                        | 49.7                                     | 60.2                                                                                 | 79.7                                                                            | 2.1                                                                                  | 4.7                                                                                    | 6.3                                                     | 57.8                                                        | 7.6                  |
| DRC          | 2        | 9.9                                        | 27.1                                        | 48.3                                     | 66.1                                                                                 | 83.3                                                                            | 2.2                                                                                  | 4.8                                                                                    | 5.6                                                     | 62.6                                                        | 7.4                  |
| DRC          | 3        | 8.9                                        | 23.9                                        | 45.8                                     | 67.0                                                                                 | 80.9                                                                            | 2.7                                                                                  | 4.6                                                                                    | 7.0                                                     | 66.6                                                        | 7.1                  |

|                 |   |      |      |      |      |      |     |     |      |      |     |
|-----------------|---|------|------|------|------|------|-----|-----|------|------|-----|
| DRC             | 4 | 6.9  | 20.2 | 41.4 | 75.5 | 84.4 | 2.4 | 4.9 | 9.8  | 75.9 | 6.5 |
| DRC             | 5 | 4.1  | 8.1  | 22.9 | 87.8 | 80.7 | 1.6 | 3.6 | 6.5  | 85.6 | 4.9 |
| Congo           | 1 | 6.1  | 17.6 | 34.5 | 60.6 | 81.8 | 0.5 | 4.0 | 71.7 | 16.2 | 7.0 |
| Congo           | 2 | 5.7  | 13.0 | 27.6 | 64.7 | 81.3 | 0.5 | 2.0 | 91.5 | 37.3 | 6.1 |
| Congo           | 3 | 5.2  | 10.7 | 23.9 | 62.4 | 76.9 | 0.7 | 3.0 | 97.4 | 41.6 | 4.9 |
| Congo           | 4 | 6.7  | 8.3  | 17.0 | 64.1 | 69.1 | 0.5 | 3.0 | 98.3 | 69.3 | 4.1 |
| Congo           | 5 | 6.1  | 4.8  | 9.3  | 75.0 | 72.9 | 0.6 | 1.0 | 99.9 | 86.4 | 3.8 |
| Cote d'Ivoire   | 1 | 10.0 | 20.7 | 38.4 | 50.3 | 56.3 | 0.5 | 6.0 | 15.0 | 16.2 | 6.7 |
| Cote d'Ivoire   | 2 | 5.9  | 16   | 35.5 | 60.0 | 58.6 | 0.5 | 6.0 | 15.9 | 37.3 | 6.0 |
| Cote d'Ivoire   | 3 | 6.9  | 12.8 | 27.7 | 53.8 | 58.7 | 0.4 | 6.0 | 12.9 | 41.6 | 5.5 |
| Cote d'Ivoire   | 4 | 7.4  | 11.7 | 24.2 | 70.0 | 62.1 | 0.5 | 4.0 | 15.5 | 69.3 | 4.3 |
| Cote d'Ivoire   | 5 | 6.9  | 10.0 | 15.5 | 76.7 | 65.5 | 0.4 | 3.0 | 11.9 | 86.4 | 3.2 |
| Ethiopia        | 1 | 12.1 | 35.6 | 49.2 | 45.2 | 18.5 | 2.6 | 5.3 | 34.6 | 17.9 | 6.0 |
| Ethiopia        | 2 | 12.3 | 33.2 | 47.7 | 53.2 | 20.4 | 2.3 | 5.2 | 29.1 | 25.2 | 5.7 |
| Ethiopia        | 3 | 9.4  | 28.8 | 45.6 | 51.4 | 26.4 | 3.6 | 6.1 | 31.9 | 34.3 | 5.3 |
| Ethiopia        | 4 | 7.7  | 25.8 | 45.0 | 59.6 | 28.1 | 2.3 | 5.2 | 25.6 | 46.1 | 5.0 |
| Ethiopia        | 5 | 5.1  | 15.1 | 29.7 | 58.1 | 39.7 | 0.6 | 4.0 | 22.1 | 63.3 | 2.8 |
| Gambia          | 1 | 11.0 | 21.8 | 29.5 | 69.4 | 45.9 | 2.7 | 6.4 | 14.0 | 86.1 | 6.7 |
| Gambia          | 2 | 12.0 | 17.8 | 27.2 | 70.9 | 45.7 | 2.7 | 6.8 | 10.0 | 88.2 | 6.8 |
| Gambia          | 3 | 13.6 | 17.9 | 25.2 | 69.5 | 47.3 | 1.7 | 6.0 | 9.6  | 86.5 | 6.2 |
| Gambia          | 4 | 9.6  | 11.8 | 22.4 | 65.8 | 51.4 | 1.3 | 5.3 | 12.7 | 77.3 | 5.3 |
| Gambia          | 5 | 11.0 | 9.7  | 15.2 | 67.4 | 48.8 | 2.2 | 4.9 | 12.1 | 68.6 | 3.8 |
| Ghana           | 1 | 6.1  | 15.6 | 24.8 | 59.0 | 61.0 | 3.5 | 6.4 | 11.4 | 24.0 | 6.3 |
| Ghana           | 2 | 3.8  | 13.3 | 25.5 | 71.2 | 65.6 | 3.0 | 5.4 | 8.6  | 39.2 | 5.5 |
| Ghana           | 3 | 2.2  | 7.2  | 17.9 | 67.7 | 69.1 | 2.8 | 4.4 | 8.4  | 42.3 | 3.9 |
| Ghana           | 4 | 6.8  | 11.6 | 14.4 | 61.9 | 71.9 | 2.6 | 4.3 | 9.9  | 44.1 | 3.5 |
| Ghana           | 5 | 4.3  | 6.3  | 8.5  | 66.5 | 68.5 | 1.9 | 3.2 | 9.7  | 52.1 | 2.8 |
| Guinea          | 1 | 13.3 | 19.8 | 33.8 | 33.0 | 16.9 | 0.7 | 7.7 | 8.5  | 38.7 | 6.5 |
| Guinea          | 2 | 9.5  | 25.6 | 41.1 | 37.7 | 18.4 | 0.7 | 8.1 | 8.0  | 47.5 | 5.5 |
| Guinea          | 3 | 8.8  | 18.6 | 33.8 | 38.2 | 27.2 | 0.7 | 6.9 | 6.4  | 61.6 | 5.7 |
| Guinea          | 4 | 8.6  | 15.8 | 25.0 | 41.9 | 32.2 | 0.6 | 6.9 | 8.7  | 82.2 | 4.8 |
| Guinea          | 5 | 6.4  | 4.8  | 15.4 | 57.9 | 45.6 | 0.6 | 4.4 | 9.9  | 92.8 | 3.4 |
| Haiti           | 1 | 5.6  | 17.8 | 31.0 | 43.4 | 63.6 | 1.8 | 3.5 | 19.1 | 42.2 | 5.7 |
| Haiti           | 2 | 4.5  | 11.4 | 26.5 | 45.3 | 60.9 | 1.8 | 2.2 | 21.7 | 57.1 | 4.7 |
| Haiti           | 3 | 5.4  | 11.5 | 20.6 | 40.2 | 66.1 | 2.1 | 2.7 | 22.6 | 72.0 | 3.8 |
| Haiti           | 4 | 6.3  | 7.9  | 16.1 | 46.0 | 68.0 | 1.1 | 1.4 | 17.7 | 84.4 | 3.1 |
| Haiti           | 5 | 3.2  | 3.8  | 6.6  | 48.2 | 62.3 | 1.5 | 2.5 | 17.2 | 85.6 | 1.9 |
| Honduras        | 1 | 1.4  | 10.2 | 27.6 | 74.4 | 77.9 | 2.4 | 4.6 | 13.6 | 31.2 | 4.6 |
| Honduras        | 2 | 1.2  | 6.5  | 19.5 | 77.9 | 82.4 | 1.1 | 2.1 | 10.0 | 45.1 | 3.3 |
| Honduras        | 3 | 0.9  | 4.7  | 13.3 | 72.3 | 82.0 | 0.6 | 0.6 | 8.2  | 49.4 | 2.9 |
| Honduras        | 4 | 0.7  | 3.3  | 9.8  | 69.7 | 82.2 | 0.5 | 0.6 | 7.4  | 51.8 | 2.4 |
| Honduras        | 5 | 1.1  | 2.7  | 7.0  | 71.5 | 87.2 | 0.5 | 0.6 | 8.4  | 50.0 | 2.0 |
| Indonesia       | 1 | 11.0 | 31.0 | 41.9 | 53.0 | 79.8 | 1.1 | 2.7 | 11.2 | 43.1 | 3.2 |
| Indonesia       | 2 | 11.4 | 27.5 | 37.1 | 58.3 | 81.5 | 0.7 | 1.1 | 7.2  | 58.4 | 2.7 |
| Indonesia       | 3 | 8.4  | 23.3 | 31.7 | 63.6 | 81.8 | 1.9 | 2.3 | 7.8  | 71.9 | 2.5 |
| Indonesia       | 4 | 9.3  | 22.0 | 29.1 | 66.4 | 83.9 | 0.6 | 0.7 | 6.3  | 76.4 | 2.4 |
| Indonesia       | 5 | 7.4  | 13.0 | 18.5 | 65.1 | 86.9 | 0.7 | 0.7 | 5.0  | 74.3 | 2.2 |
| Kenya           | 1 | 17.5 | 50.3 | 53.7 | 64.3 | 51.6 | 2.9 | 4.6 | 8.5  | 56.5 | 6.4 |
| Kenya           | 2 | 16.2 | 41.6 | 45.4 | 71.3 | 70.8 | 3.2 | 4.5 | 5.7  | 88.5 | 4.7 |
| Kenya           | 3 | 17.7 | 36.0 | 40.7 | 72.5 | 71.7 | 2.4 | 4.1 | 8.0  | 91.7 | 3.8 |
| Kenya           | 4 | 13.6 | 27.5 | 35.9 | 76.2 | 84.7 | 4.1 | 4.7 | 8.8  | 91.9 | 3.1 |
| Kenya           | 5 | 12.1 | 20.9 | 25.7 | 76.4 | 86.1 | 3.5 | 4.2 | 7.0  | 87.6 | 2.8 |
| Kyrgyz Republic | 1 | 2.7  | 4.5  | 18.3 | NA   | 66.2 | 3.9 | 5.9 | 5.7  | 58   | 4.0 |

|                 |   |      |      |      |      |      |     |     |      |      |     |
|-----------------|---|------|------|------|------|------|-----|-----|------|------|-----|
| Kyrgyz Republic | 2 | 2.1  | 2.6  | 18.6 | NA   | 63.2 | 1.8 | 5.3 | 4.5  | 68.2 | 4.1 |
| Kyrgyz Republic | 3 | 3.2  | 3.7  | 16.7 | NA   | 69.0 | 3.3 | 5.9 | 7.5  | 69.6 | 3.9 |
| Kyrgyz Republic | 4 | 2.0  | 2.9  | 16.4 | NA   | 63.7 | 2.6 | 4.9 | 5.5  | 68   | 4.0 |
| Kyrgyz Republic | 5 | 4.1  | 3.3  | 19.0 | NA   | 67.3 | 3.4 | 6.0 | 7.4  | 81.6 | 2.7 |
| Lesotho         | 1 | 7.5  | 15.5 | 45.6 | 59.1 | 55.0 | 4.3 | 5.4 | 15.2 | 24.0 | 5.0 |
| Lesotho         | 2 | 7.3  | 12.8 | 38.1 | 59.6 | 62.5 | 4.4 | 4.8 | 8.3  | 49.4 | 3.9 |
| Lesotho         | 3 | 7.4  | 9.0  | 34.8 | 61.9 | 60.4 | 4.5 | 4.8 | 11.6 | 71.9 | 3.8 |
| Lesotho         | 4 | 7.3  | 9.1  | 28.2 | 63.2 | 61.1 | 4.1 | 4.2 | 8.6  | 82.7 | 2.7 |
| Lesotho         | 5 | 7.4  | 2.8  | 13.4 | 62.9 | 65.8 | 4.1 | 4.2 | 9.2  | 86.4 | 2.1 |
| Liberia         | 1 | 6.1  | 18.3 | 35.3 | 50.8 | 68.1 | 3.2 | 7.3 | 10.8 | 15.9 | 6.6 |
| Liberia         | 2 | 6.2  | 18.8 | 35.2 | 58.0 | 69.5 | 3.6 | 7.4 | 11.7 | 25.6 | 5.9 |
| Liberia         | 3 | 6.4  | 15.1 | 35.3 | 61.2 | 66.1 | 3.1 | 6.4 | 7.7  | 30.4 | 5.2 |
| Liberia         | 4 | 6.8  | 11.3 | 27.7 | 67.4 | 69.7 | 2.8 | 5.8 | 12.0 | 45.8 | 3.9 |
| Liberia         | 5 | 3.9  | 8.5  | 19.9 | 69.2 | 55.9 | 1.7 | 3.6 | 7.0  | 47.3 | 2.8 |
| Malawi          | 1 | 5.0  | 16.5 | 55.5 | 85.0 | 72.7 | 3.5 | 3.9 | 13.5 | 64.5 | 6.8 |
| Malawi          | 2 | 4.5  | 14.3 | 50.8 | 84.9 | 72.7 | 3.4 | 4.0 | 13.2 | 76.2 | 6.8 |
| Malawi          | 3 | 4.6  | 12.3 | 46.5 | 87.3 | 79.9 | 4.1 | 4.6 | 12.6 | 81.0 | 6.3 |
| Malawi          | 4 | 3.8  | 13.7 | 46.8 | 86.1 | 79.7 | 4.1 | 4.4 | 11.8 | 82.1 | 5.3 |
| Malawi          | 5 | 1.9  | 7.4  | 36.0 | 84.5 | 79.1 | 3.6 | 4.0 | 10.6 | 88.6 | 3.7 |
| Mali            | 1 | 14.5 | 31.8 | 46.4 | 54.9 | 49.8 | 0.8 | 5.3 | 18.8 | 37.9 | 6.7 |
| Mali            | 2 | 15.5 | 31.8 | 44.4 | 53.7 | 49.8 | 1.1 | 7.0 | 18.6 | 47.6 | 6.8 |
| Mali            | 3 | 12.7 | 25.8 | 42.4 | 59.5 | 51.1 | 1.1 | 7.2 | 17.6 | 54.7 | 6.6 |
| Mali            | 4 | 10.0 | 20.8 | 33.9 | 65.6 | 59.3 | 0.7 | 5.4 | 14.4 | 73.5 | 6.1 |
| Mali            | 5 | 10.1 | 15.1 | 21.2 | 72.6 | 63.7 | 0.9 | 4.7 | 13.9 | 85.2 | 4.7 |
| Mozambique      | 1 | 9.6  | 23.0 | 51.1 | 65.4 | 75.3 | 1.4 | 4.2 | 14.8 | 64.5 | 7.2 |
| Mozambique      | 2 | 6.1  | 17.2 | 48.0 | 66.3 | 72.0 | 0.7 | 4.5 | 14.6 | 76.2 | 7.2 |
| Mozambique      | 3 | 5.3  | 15.2 | 46.4 | 75.5 | 71.4 | 1.1 | 5.1 | 15.5 | 81.0 | 6.3 |
| Mozambique      | 4 | 4.0  | 9.7  | 37.4 | 81.7 | 65.8 | 1.8 | 4.7 | 14.7 | 82.1 | 5.6 |
| Mozambique      | 5 | 3.2  | 6.4  | 24.1 | 89.9 | 68.8 | 1.9 | 4.3 | 11.7 | 88.6 | 3.7 |
| Nepal           | 1 | 12.5 | 40.3 | 56.0 | 89.4 | 47.4 | 4.6 | 5.3 | 16.8 | 19.6 | 4.1 |
| Nepal           | 2 | 10.7 | 31.6 | 45.7 | 89.7 | 46.6 | 4.6 | 5.9 | 12.0 | 26.3 | 3.1 |
| Nepal           | 3 | 12.8 | 28.8 | 34.5 | 91.4 | 39.9 | 4.7 | 6.0 | 12.1 | 33.8 | 2.7 |
| Nepal           | 4 | 8.8  | 22.9 | 30.5 | 91.3 | 49.8 | 4.3 | 5.5 | 11.8 | 57.5 | 2.1 |
| Nepal           | 5 | 7.4  | 10.0 | 25.8 | 90.8 | 52.7 | 2.2 | 3.4 | 12.2 | 84.7 | 1.5 |
| Niger           | 1 | 24.3 | 47.3 | 55.7 | 52.7 | NA   | NA  | NA  | 16.9 | 37.9 | 8.4 |
| Niger           | 2 | 20.8 | 45.7 | 53.4 | 60.8 | NA   | NA  | NA  | 19.5 | 47.6 | 8.3 |
| Niger           | 3 | 21.2 | 43.0 | 48.3 | 60.7 | NA   | NA  | NA  | 14.0 | 54.7 | 9.2 |
| Niger           | 4 | 16.7 | 40.2 | 54.6 | 63.7 | NA   | NA  | NA  | 9.0  | 73.5 | 8.9 |
| Niger           | 5 | 16.5 | 32.7 | 45.1 | 87.6 | NA   | NA  | NA  | 8.7  | 85.2 | 7.1 |
| Nigeria         | 1 | 21.9 | 41.9 | 53.8 | 20.9 | NA   | 0.4 | 4.9 | 13.5 | 56.7 | 7.0 |
| Nigeria         | 2 | 19.7 | 34.8 | 46.1 | 30.9 | NA   | 0.5 | 4.5 | 17.3 | 57.4 | 6.7 |
| Nigeria         | 3 | 16.8 | 25.7 | 35.1 | 42.8 | NA   | 0.5 | 3.9 | 9.1  | 51.7 | 5.7 |
| Nigeria         | 4 | 16.7 | 22.1 | 26.3 | 53.0 | NA   | 0.6 | 4   | 8.7  | 60.8 | 4.9 |
| Nigeria         | 5 | 13.9 | 15.6 | 18.0 | 67.3 | NA   | 1.1 | 4.4 | 6.8  | 72.3 | 3.9 |
| Pakistan        | 1 | 17.3 | 47.8 | 61.6 | 62.9 | 32.6 | 0.7 | 4.4 | 67.1 | 19.6 | 5.2 |
| Pakistan        | 2 | 10.5 | 34.2 | 55.7 | 76.7 | 39.5 | 0.7 | 2.6 | 42.7 | 24.1 | 4.4 |
| Pakistan        | 3 | 9.4  | 26.1 | 40.6 | 77.3 | 44.6 | 1.2 | 2.9 | 40.0 | 31.7 | 3.8 |
| Pakistan        | 4 | 7.8  | 22.4 | 37.8 | 74.6 | 49.5 | 0.7 | 1.4 | 22.8 | 49.8 | 3.4 |
| Pakistan        | 5 | 8.2  | 15.6 | 23.0 | 69.7 | 60.6 | 1.0 | 1.3 | 19.1 | 73.1 | 2.7 |
| Rwanda          | 1 | 3.5  | 15.5 | 54.0 | 91.5 | 66.9 | 5.1 | 5.8 | 9.0  | 82.4 | 5.4 |

|              |   |      |      |      |      |      |     |      |      |      |     |
|--------------|---|------|------|------|------|------|-----|------|------|------|-----|
| Rwanda       | 2 | 3.2  | 13.8 | 51.1 | 91.7 | 70.8 | 5.3 | 6.0  | 6.9  | 84.4 | 5.2 |
| Rwanda       | 3 | 2.0  | 11.4 | 45.7 | 92.3 | 72.5 | 5.9 | 6.7  | 5.8  | 87.2 | 4.5 |
| Rwanda       | 4 | 2.4  | 9.2  | 39.2 | 95.2 | 74.0 | 5.2 | 5.9  | 5.5  | 89.4 | 4.4 |
| Rwanda       | 5 | 2.8  | 5.2  | 25.8 | 94.6 | 83.0 | 4.7 | 5.3  | 4.0  | 91.6 | 3.4 |
| Senegal      | 1 | 8.2  | 19.2 | 28.8 | NA   | NA   | NA  | 6.4  | NA   | 86.1 | 6.7 |
| Senegal      | 2 | 6.7  | 14.7 | 21.7 | NA   | NA   | NA  | 6.8  | NA   | 88.2 | 6.8 |
| Senegal      | 3 | 6.3  | 11.1 | 15.5 | NA   | NA   | NA  | 6.0  | NA   | 86.5 | 6.2 |
| Senegal      | 4 | 3.4  | 8.6  | 13.4 | NA   | NA   | NA  | 5.3  | NA   | 77.3 | 5.3 |
| Senegal      | 5 | 3.3  | 5.3  | 8.4  | NA   | NA   | NA  | 4.9  | NA   | 68.6 | 3.8 |
| Sierra Leone | 1 | 7.7  | 17.3 | 42.6 | 85.4 | 42.0 | 0.7 | 5.5  | 7.2  | 59.0 | 6.1 |
| Sierra Leone | 2 | 10.6 | 19.6 | 40.4 | 80.6 | 42.4 | 0.9 | 5.5  | 3.9  | 73.0 | 5.8 |
| Sierra Leone | 3 | 9.7  | 16.6 | 38.1 | 81.3 | 47.9 | 0.9 | 5.4  | 5.0  | 75.9 | 5.5 |
| Sierra Leone | 4 | 9.6  | 15.5 | 35.0 | 83.4 | 46.4 | 0.8 | 4.8  | 6.9  | 85.0 | 4.7 |
| Sierra Leone | 5 | 8.5  | 10.3 | 28.1 | 86.1 | 52.4 | 0.5 | 2.9  | 12.9 | 86.9 | 3.0 |
| Tajikistan   | 1 | 9.5  | 15.8 | 32.1 | 77.9 | 43.1 | 1.4 | 5.8  | 9.5  | 91.1 | 4.1 |
| Tajikistan   | 2 | 10.9 | 13.7 | 29.0 | 82.8 | 50.2 | 2.2 | 6.0  | 7.8  | 89.3 | 4.1 |
| Tajikistan   | 3 | 9.6  | 10.2 | 23.4 | 76.0 | 57.9 | 1.5 | 5.6  | 6.8  | 88.7 | 3.9 |
| Tajikistan   | 4 | 10.5 | 11.5 | 24.9 | 76.5 | 53.3 | 0.7 | 5.2  | 6.4  | 88.8 | 3.5 |
| Tajikistan   | 5 | 9.0  | 9.3  | 20.9 | 68.1 | 53.8 | 0.7 | 3.9  | 5.8  | 89.9 | 3.2 |
| Tanzania     | 1 | 6.6  | 21.5 | 48.4 | 53.3 | 62.5 | 3.2 | 3.8  | 6.3  | 61.0 | 7.0 |
| Tanzania     | 2 | 3.8  | 17.9 | 45.1 | 54.2 | 65.8 | 2.7 | 3.5  | 6.3  | 67.2 | 6.8 |
| Tanzania     | 3 | 4.4  | 14.4 | 44.3 | 62.7 | 58.0 | 2.4 | 3.2  | 5.3  | 73.5 | 6.1 |
| Tanzania     | 4 | 4.4  | 12.8 | 39.2 | 68.7 | 58.5 | 2.1 | 2.8  | 6.7  | 80.7 | 4.7 |
| Tanzania     | 5 | 4.7  | 9.3  | 26.3 | 69.5 | 62.5 | 1.6 | 2.2  | 9.1  | 86.7 | 3.2 |
| Timor-Leste  | 1 | 20.8 | 49.4 | 63.0 | 43.8 | 74.0 | 3.1 | 3.6  | 10.6 | 13.8 | 7.3 |
| Timor-Leste  | 2 | 18.7 | 48.0 | 63.5 | 44.4 | 73.5 | 3.3 | 3.9  | 16.5 | 16.5 | 6.0 |
| Timor-Leste  | 3 | 19.6 | 48.1 | 60.5 | 50.7 | 78.1 | 2.2 | 3.6  | 11.7 | 22.0 | 6.1 |
| Timor-Leste  | 4 | 17.6 | 41.4 | 55.4 | 56.6 | 82.4 | 2.5 | 3.2  | 10.5 | 36.8 | 5.3 |
| Timor-Leste  | 5 | 16.2 | 35.3 | 47.1 | 58.5 | 88.4 | 1.4 | 1.6  | 8.1  | 50.5 | 4.2 |
| Togo         | 1 | 8.0  | 20.2 | 33.4 | 85.3 | 68.1 | 2.9 | 5.5  | 9.3  | 7.5  | 6.3 |
| Togo         | 2 | 6.6  | 21.1 | 37.5 | 77.7 | 72.7 | 2.3 | 5.4  | 9.5  | 12.9 | 5.8 |
| Togo         | 3 | 7.0  | 17.3 | 32.5 | 80.0 | 65.4 | 2.7 | 5.3  | 11.2 | 25.7 | 5.4 |
| Togo         | 4 | 6.6  | 12.2 | 19.4 | 83.8 | 65.9 | 3.4 | 6.1  | 9.0  | 68.9 | 3.9 |
| Togo         | 5 | 4.0  | 7.2  | 10.6 | 81.8 | 71.1 | 3.2 | 5.8  | 8.8  | 86.3 | 3.5 |
| Uganda       | 1 | 4.1  | 18.1 | 37.3 | 62.1 | 63.7 | 3.5 | 4.6  | 10.5 | 68.1 | 7.9 |
| Uganda       | 2 | 6.2  | 14.3 | 30.9 | 58.3 | 63.3 | 3.7 | 5.0  | 8.5  | 82.4 | 7.1 |
| Uganda       | 3 | 5.7  | 17.3 | 45.0 | 50.8 | 58.1 | 3.5 | 4.4  | 9.3  | 83.7 | 6.9 |
| Uganda       | 4 | 4.5  | 9.5  | 30.5 | 55.5 | 59.5 | 3.6 | 4.3  | 10.9 | 87.4 | 6.1 |
| Uganda       | 5 | 2.8  | 8.4  | 20.8 | 56.4 | 60.6 | 2.6 | 3.6  | 11.2 | 91.0 | 4.0 |
| Yemen        | 1 | 20.7 | 54.0 | 59.2 | 47.4 | 34.0 | NA  | 20.8 | 29.4 | 17.3 | 6.1 |
| Yemen        | 2 | 17.8 | 45.1 | 55.5 | 55.0 | 36.9 | NA  | 18.3 | 42.5 | 32.4 | 5.3 |
| Yemen        | 3 | 14.2 | 37.9 | 48.1 | 55.6 | 45.7 | NA  | 17.2 | 26.2 | 42.1 | 4.5 |
| Yemen        | 4 | 15.0 | 31.0 | 38.3 | 58.2 | 59.0 | NA  | 18.1 | 27.1 | 47.7 | 3.8 |
| Yemen        | 5 | 12.5 | 22.1 | 25.9 | 61.6 | 67.6 | NA  | 17.7 | 20.1 | 46.7 | 2.9 |
| Zambia       | 1 | 6.8  | 20.1 | 47.3 | 70.5 | 72.8 | 4.2 | 4.9  | 10.0 | 77.0 | 7.1 |
| Zambia       | 2 | 5.9  | 15.7 | 41.7 | 77.7 | 75.3 | 4.1 | 5.1  | 7.6  | 77.6 | 7.0 |
| Zambia       | 3 | 5.2  | 13.7 | 40.2 | 75.8 | 74.6 | 4.2 | 4.8  | 8.9  | 83.1 | 6.0 |
| Zambia       | 4 | 6.5  | 12.7 | 37.6 | 78.8 | 75.6 | 4.3 | 4.8  | 10.3 | 91.7 | 4.2 |
| Zambia       | 5 | 5.7  | 8.7  | 28.4 | 82.6 | 77.9 | 3.5 | 4.2  | 9.4  | 91.5 | 3.0 |
| Zimbabwe     | 1 | 3.2  | 12.0 | 36.8 | 60.1 | 63.0 | 0.6 | 3.6  | 9.9  | 64.3 | 5.3 |
| Zimbabwe     | 2 | 3.3  | 11.0 | 32.0 | 62.4 | 62.0 | 0.7 | 3.4  | 7.6  | 77.7 | 5.1 |
| Zimbabwe     | 3 | 2.9  | 9.0  | 35.0 | 66.9 | 70.0 | 1.3 | 3.1  | 10.2 | 85.5 | 4.4 |
| Zimbabwe     | 4 | 3.7  | 8.8  | 28.6 | 70.1 | 66.2 | 1.1 | 2.6  | 9.9  | 94.2 | 3.8 |

|          |   |     |     |      |      |      |     |     |     |      |     |
|----------|---|-----|-----|------|------|------|-----|-----|-----|------|-----|
| Zimbabwe | 5 | 1.1 | 5.7 | 23.8 | 70.2 | 68.9 | 2.4 | 3.3 | 9.5 | 96.3 | 2.6 |
|----------|---|-----|-----|------|------|------|-----|-----|-----|------|-----|

NA: not available; MCV: measles containing vaccine; DPT: diphtheria, pertussis, and tetanus; SD: standard deviation; vitA: vitamin A.  
Data source: Demographic and Health Survey (DHS) (1).



**Table S4.2.** Input data for the proportion of attributable and unattributable cases and deaths for 41 low- and middle-income countries.

| Country                          | Measles                                          |                                                         | Pneumonia                                        |                                                         | Diarrhea                                         |                                                         |
|----------------------------------|--------------------------------------------------|---------------------------------------------------------|--------------------------------------------------|---------------------------------------------------------|--------------------------------------------------|---------------------------------------------------------|
|                                  | Proportion of cases attributable to risk factors | Proportion of deaths attributable to prognostic factors | Proportion of cases attributable to risk factors | Proportion of deaths attributable to prognostic factors | Proportion of cases attributable to risk factors | Proportion of deaths attributable to prognostic factors |
| Armenia                          | 0.43                                             | 0.43                                                    | 0.73                                             | 0.81                                                    | 0.85                                             | 0.90                                                    |
| Burundi                          | 0.78                                             | 0.78                                                    | 0.93                                             | 0.94                                                    | 0.96                                             | 0.97                                                    |
| Benin                            | 0.84                                             | 0.84                                                    | 0.94                                             | 0.96                                                    | 0.97                                             | 0.98                                                    |
| Burkina Faso                     | 0.82                                             | 0.82                                                    | 0.95                                             | 0.96                                                    | 0.98                                             | 0.98                                                    |
| Bangladesh                       | 0.81                                             | 0.81                                                    | 0.94                                             | 0.95                                                    | 0.97                                             | 0.98                                                    |
| Cote d'Ivoire                    | 0.78                                             | 0.77                                                    | 0.92                                             | 0.94                                                    | 0.95                                             | 0.97                                                    |
| Cameroon                         | 0.69                                             | 0.69                                                    | 0.90                                             | 0.92                                                    | 0.94                                             | 0.96                                                    |
| Democratic Republic of the Congo | 0.80                                             | 0.80                                                    | 0.93                                             | 0.95                                                    | 0.96                                             | 0.97                                                    |
| Congo                            | 0.74                                             | 0.74                                                    | 0.89                                             | 0.92                                                    | 0.94                                             | 0.96                                                    |
| Comoros                          | 0.82                                             | 0.82                                                    | 0.94                                             | 0.96                                                    | 0.97                                             | 0.98                                                    |
| Ethiopia                         | 0.80                                             | 0.81                                                    | 0.94                                             | 0.95                                                    | 0.97                                             | 0.98                                                    |
| Ghana                            | 0.69                                             | 0.69                                                    | 0.88                                             | 0.90                                                    | 0.93                                             | 0.95                                                    |
| Guinea                           | 0.77                                             | 0.77                                                    | 0.94                                             | 0.95                                                    | 0.96                                             | 0.97                                                    |
| The Gambia                       | 0.76                                             | 0.76                                                    | 0.93                                             | 0.94                                                    | 0.95                                             | 0.96                                                    |
| Honduras                         | 0.26                                             | 0.25                                                    | 0.77                                             | 0.82                                                    | 0.82                                             | 0.88                                                    |
| Haiti                            | 0.40                                             | 0.40                                                    | 0.89                                             | 0.92                                                    | 0.94                                             | 0.97                                                    |
| Indonesia                        | 0.72                                             | 0.71                                                    | 0.86                                             | 0.91                                                    | 0.93                                             | 0.95                                                    |
| Kenya                            | 0.72                                             | 0.75                                                    | 0.87                                             | 0.90                                                    | 0.92                                             | 0.95                                                    |
| Kyrgyzstan                       | 0.53                                             | 0.53                                                    | 0.76                                             | 0.82                                                    | 0.90                                             | 0.93                                                    |
| Cambodia                         | 0.76                                             | 0.76                                                    | 0.91                                             | 0.94                                                    | 0.95                                             | 0.97                                                    |
| Liberia                          | 0.75                                             | 0.75                                                    | 0.92                                             | 0.94                                                    | 0.95                                             | 0.96                                                    |
| Lesotho                          | 0.73                                             | 0.73                                                    | 0.86                                             | 0.89                                                    | 0.93                                             | 0.96                                                    |
| Mali                             | 0.82                                             | 0.82                                                    | 0.95                                             | 0.96                                                    | 0.97                                             | 0.98                                                    |

|              |      |      |      |      |      |      |
|--------------|------|------|------|------|------|------|
| Mozambique   | 0.76 | 0.76 | 0.92 | 0.94 | 0.95 | 0.97 |
| Malawi       | 0.74 | 0.74 | 0.91 | 0.92 | 0.95 | 0.96 |
| Niger        | 0.88 | 0.88 | 0.96 | 0.97 | 0.98 | 0.99 |
| Nigeria      | 0.78 | 0.78 | 0.93 | 0.95 | 0.97 | 0.98 |
| Nepal        | 0.80 | 0.80 | 0.92 | 0.94 | 0.95 | 0.97 |
| Pakistan     | 0.79 | 0.79 | 0.93 | 0.95 | 0.95 | 0.97 |
| Rwanda       | 0.56 | 0.56 | 0.88 | 0.90 | 0.92 | 0.93 |
| Senegal      | 0.70 | 0.70 | 0.91 | 0.92 | 0.94 | 0.95 |
| Sierra Leone | 0.78 | 0.78 | 0.94 | 0.95 | 0.96 | 0.98 |
| Chad         | 0.86 | 0.86 | 0.96 | 0.97 | 0.98 | 0.98 |
| Togo         | 0.72 | 0.72 | 0.91 | 0.93 | 0.95 | 0.96 |
| Tajikistan   | 0.68 | 0.42 | 0.87 | 0.90 | 0.95 | 0.97 |
| Timor-leste  | 0.84 | 0.84 | 0.94 | 0.96 | 0.97 | 0.98 |
| Tanzania     | 0.68 | 0.68 | 0.91 | 0.93 | 0.95 | 0.96 |
| Uganda       | 0.68 | 0.68 | 0.90 | 0.93 | 0.94 | 0.96 |
| Yemen        | 0.89 | 0.89 | 0.93 | 0.95 | 0.97 | 0.99 |
| Zambia       | 0.75 | 0.75 | 0.91 | 0.92 | 0.94 | 0.96 |
| Zimbabwe     | 0.67 | 0.67 | 0.87 | 0.90 | 0.90 | 0.94 |

## V. Full results

Table S5.1-S5.6 show the full results from the analysis for all 41 countries. For each scenario, we report the total number of cases/deaths averted (expressed as a percentage decrease) from Scenario 1, and the change in the area under the curve (expressed as a percentage) from Scenario 1.

The definitions of the five scenarios for the cases and deaths are:

### *Cases*

- S1: distribution of cases when no vaccine is available;
- S2: current quintile-specific vaccine coverage rates;
- S3: national average of vaccine coverage for all quintiles;
- S4: vaccine coverage proportional to quintile-specific baseline mortality risks;
- S5: equal baseline morbidity risk with current quintile-specific vaccine coverage rates.

### *Deaths*

- S1: distribution of deaths when no treatment is available;
- S2: current quintile-specific treatment coverage rates;
- S3: national average of treatment coverage for all quintiles;
- S4: treatment coverage proportional to quintile-specific baseline mortality risks;
- S5: equal baseline mortality risk with current quintile-specific treatment coverage rates.

**Table S5.1.** Change in the distribution of measles cases by wealth quintile for four scenarios, compared to when no vaccines are available (Scenario 1).

| Country         | Total cases averted (%) |                   |                   |                   | Change in AUC (compared to S1) (%) |                   |                      |                      |
|-----------------|-------------------------|-------------------|-------------------|-------------------|------------------------------------|-------------------|----------------------|----------------------|
|                 | S2                      | S3                | S4                | S5                | S2 AUC                             | S3 AUC            | S4 AUC               | S5 AUC               |
| Armenia         | 82.4 (80.3, 84.4)       | 78.4 (76.4, 80.4) | 79.2 (76.8, 81.7) | 82.3 (80.3, 84.3) | -3.0 (-3.4, -2.6)                  | 17.7 (15.9, 19.9) | -14.9 (-17.6, -12.4) | -11.2 (-12.1, -10.1) |
| Burundi         | 80.6 (78.5, 82.6)       | 78.0 (76.0, 80.0) | 79.3 (77.1, 81.5) | 80.8 (78.8, 82.7) | 4.0 (3.5, 4.5)                     | 14.4 (12.9, 16.1) | -15.5 (-18.5, -12.2) | -2.7 (-4.3, -1.0)    |
| Benin           | 54.2 (52.2, 56.2)       | 54.2 (52.3, 56.2) | 56.3 (54.9, 57.7) | 55.3 (53.9, 56.6) | 9.9 (9.3, 10.4)                    | 7.7 (7.3, 8.1)    | -8.2 (-9.2, -7.2)    | 3.7 (3.0, 4.3)       |
| Burkina Faso    | 76.0 (74.1, 77.9)       | 74.3 (72.5, 76.2) | 76.5 (74.6, 78.4) | 76.5 (74.7, 78.3) | 9.6 (8.7, 10.6)                    | 14.7 (13.4, 16.2) | -17.3 (-19.7, -15)   | 2.8 (1.5, 4.1)       |
| Bangladesh      | 76.7 (74.8, 78.7)       | 74.4 (72.5, 76.4) | 76.8 (74.8, 78.8) | 77.4 (75.5, 79.2) | 9.0 (8.1, 10.0)                    | 16.6 (15.2, 18.4) | -18.8 (-21.4, -16.1) | 1.3 (-0.3, 3.0)      |
| Cote d'Ivoire   | 54.0 (51.9, 56.0)       | 54.0 (51.8, 56.0) | 56.7 (55.1, 58.3) | 55.3 (53.9, 56.6) | 9.1 (8.5, 9.7)                     | 9.3 (8.7, 9.9)    | -10.4 (-12.4, -8.4)  | 1.7 (0.0, 3.2)       |
| Cameroon        | 66.4 (64.1, 68.7)       | 64.7 (62.4, 67.0) | 70.1 (68.2, 72.0) | 69.7 (68.0, 71.4) | 16.9 (15.5, 18.3)                  | 21.2 (19.5, 23)   | -22.7 (-24.9, -20.4) | 4.6 (2.0, 7.4)       |
| DRC             | 65.4 (63.7, 67.2)       | 61.9 (60.3, 63.6) | 71.6 (69.8, 73.5) | 67.2 (65.6, 68.7) | 8.5 (7.9, 9.1)                     | 13.3 (12.5, 14.3) | -22.7 (-25.2, -20.4) | -1.5 (-2.6, -0.4)    |
| Congo           | 68.1 (66.1, 70.1)       | 67.1 (65.0, 69.0) | 71.5 (69.4, 73.6) | 69.7 (68.0, 71.4) | 15 (13.8, 16.3)                    | 15.5 (14.2, 16.9) | -20.1 (-22.9, -17)   | 6.7 (4.6, 9.1)       |
| Comoros         | 68.7 (66.7, 70.5)       | 67.8 (65.9, 69.6) | 70.7 (69.0, 72.5) | 69.7 (68.0, 71.4) | 11.2 (10.3, 12.1)                  | 15.9 (14.6, 17.2) | -18 (-19.9, -16.2)   | 2.2 (0.8, 3.8)       |
| Ethiopia        | 59.1 (57.5, 60.7)       | 59.1 (57.5, 60.8) | 63.2 (61.6, 64.8) | 61.1 (59.7, 62.5) | 12.1 (11.4, 12.8)                  | 13.2 (12.4, 14.0) | -13.9 (-15.3, -12.3) | 5.5 (4.4, 6.6)       |
| Ghana           | 79.7 (77.6, 81.7)       | 76.6 (74.6, 78.6) | 77.9 (75.4, 80.5) | 79.9 (78.0, 81.8) | 4.1 (3.6, 4.6)                     | 15.6 (14.1, 17.4) | -13.5 (-17.1, -9.8)  | -2.5 (-4.1, -1.1)    |
| Guinea          | 44.3 (42.2, 46.4)       | 44.3 (42.2, 46.3) | 47.9 (46.6, 49.2) | 45.9 (44.8, 47.0) | 6.3 (6.0, 6.7)                     | 7.9 (7.5, 8.4)    | -7.7 (-8.4, -6.9)    | -2.9 (-3.7, -2.0)    |
| Gambia          | 81.6 (79.6, 83.6)       | 80.0 (78.0, 82.1) | 80.4 (78.1, 82.8) | 81.2 (79.3, 83.2) | -10.7 (-12.3, -9.4)                | 4.0 (3.5, 4.5)    | -9.8 (-14.7, -5.5)   | -14.2 (-16, -12.6)   |
| Honduras        | 76.6 (74.7, 78.4)       | 76.5 (74.7, 78.4) | 76.6 (74.7, 78.5) | 76.5 (74.7, 78.3) | -1.1 (-1.2, -1.0)                  | 10.2 (9.2, 11.3)  | -10.3 (-12.8, -7.9)  | -4.2 (-5.1, -3.4)    |
| Haiti           | 46.8 (45.2, 48.4)       | 46.8 (45.3, 48.3) | 47.0 (45.9, 48.2) | 46.8 (45.6, 47.9) | -0.5 (-0.6, -0.5)                  | 2.9 (2.8, 3.1)    | -2.8 (-3.6, -2.1)    | -4.1 (-4.8, -3.5)    |
| Indonesia       | 66.8 (65.1, 68.5)       | 66.7 (65.1, 68.4) | 68.4 (66.7, 70.2) | 67.2 (65.6, 68.7) | 4.2 (3.9, 4.5)                     | 13.6 (12.7, 14.7) | -14.4 (-16.7, -12.3) | -2.8 (-3.7, -2.0)    |
| Kenya           | 68.1 (66.2, 69.9)       | 67.8 (65.9, 69.6) | 70.3 (68.5, 72.1) | 68.9 (67.2, 70.5) | 7.7 (7.1, 8.3)                     | 16.7 (15.5, 18.1) | -18.4 (-20.2, -16.5) | -0.8 (-2.1, 0.4)     |
| Kyrgyz Republic | 83.3 (81.2, 85.3)       | 82.7 (80.7, 84.8) | 82.4 (80.2, 84.8) | 83.2 (81.2, 85.2) | -4.5 (-5.2, -3.9)                  | 7.2 (6.3, 8.3)    | -2.9 (-6.5, 0.8)     | -5.9 (-6.9, -4.9)    |
| Cambodia        | 76.9 (75.0, 78.8)       | 75.3 (73.4, 77.1) | 78.9 (77.0, 80.9) | 77.7 (75.9, 79.6) | 15.8 (14.3, 17.7)                  | 15.0 (13.7, 16.6) | -15.9 (-18.3, -13.4) | 9.6 (7.7, 11.7)      |
| Liberia         | 50.4 (48.9, 52.0)       | 50.4 (48.9, 52.0) | 52.0 (50.7, 53.3) | 51.0 (49.8, 52.2) | 4.2 (4.0, 4.4)                     | 7.4 (7.1, 7.8)    | -7.4 (-8.3, -6.6)    | -3.0 (-3.6, -2.4)    |
| Lesotho         | 79.4 (77.2, 81.6)       | 76.1 (73.9, 78.2) | 77.4 (75.3, 79.6) | 79.7 (77.8, 81.6) | 3.6 (3.2, 4.0)                     | 17.5 (15.7, 19.5) | -18.6 (-21.4, -15.7) | -5.6 (-8.0, -3.6)    |
| Mali            | 68.3 (66.6, 70.1)       | 66.7 (65.0, 68.4) | 72.6 (70.8, 74.5) | 69.7 (68.0, 71.4) | 10.1 (9.3, 11)                     | 16.4 (15.2, 17.8) | -22.7 (-25, -20.2)   | 1.7 (0.5, 2.9)       |
| Mozambique      | 72.1 (70.3, 74.0)       | 67.0 (65.2, 68.9) | 73.9 (72.1, 75.8) | 74.0 (72.2, 75.7) | 10.3 (9.4, 11.2)                   | 18.5 (17.1, 19.9) | -23.9 (-25.9, -22.0) | -1.1 (-2.2, 0.2)     |
| Malawi          | 73.6 (71.5, 75.7)       | 71.2 (69.1, 73.3) | 74.5 (72.4, 76.8) | 74.0 (72.2, 75.7) | 3.1 (2.8, 3.4)                     | 17.6 (16, 19.3)   | -20.8 (-23.5, -17.9) | -6.1 (-7.8, -4.0)    |
| Niger           | 61.9 (59.9, 63.9)       | 61.9 (59.9, 63.8) | 64.4 (62.6, 66.3) | 62.9 (61.4, 64.4) | 8.5 (8.0, 9.1)                     | 11.9 (11.1, 12.7) | -12.8 (-14.2, -11.1) | 2.0 (1.2, 2.7)       |
| Nigeria         | 40.3 (38.5, 41.9)       | 40.3 (38.8, 41.9) | 46.9 (45.7, 48.1) | 45.1 (44.0, 46.1) | 19.0 (18.0, 19.8)                  | 6.8 (6.5, 7.1)    | -8.2 (-9.3, -7.3)    | 11.5 (9.8, 12.9)     |
| Nepal           | 75.9 (73.8, 78.0)       | 72.4 (70.2, 74.6) | 76.9 (74.4, 79.4) | 76.5 (74.7, 78.3) | 6.1 (5.5, 6.8)                     | 13.0 (11.9, 14.4) | -19.6 (-23, -16.2)   | -1.3 (-3.8, 0.9)     |
| Pakistan        | 51.9 (49.7, 54.0)       | 51.9 (49.7, 54.0) | 58.7 (57.1, 60.4) | 55.3 (54.0, 56.5) | 14.6 (13.8, 15.4)                  | 12.5 (11.9, 13.2) | -16.8 (-19.0, -14.8) | 3.2 (1.6, 4.6)       |
| Rwanda          | 83.1 (81.1, 85.1)       | 79.6 (77.6, 81.5) | 80.1 (77.8, 82.6) | 83.3 (81.3, 85.2) | 3.9 (3.4, 4.6)                     | 14.1 (12.5, 15.9) | -14.1 (-17.4, -10.9) | -2.3 (-3.4, -1.1)    |
| Senegal         | 69.4 (67.5, 71.4)       | 68.9 (66.8, 70.9) | 71.0 (69.0, 73.0) | 69.7 (68.0, 71.4) | 3.0 (2.8, 3.3)                     | 15.1 (13.9, 16.3) | -17.3 (-20.1, -13.7) | -4.4 (-6.1, -2.8)    |
| Sierra Leone    | 67.9 (66.2, 69.7)       | 67.9 (66.2, 69.7) | 68.8 (67.0, 70.6) | 68.0 (66.4, 69.6) | -0.8 (-0.9, -0.7)                  | 8.6 (7.9, 9.3)    | -8.3 (-10.3, -6.5)   | -5.0 (-5.8, -4.2)    |
| Chad            | 47.4 (45.9, 48.9)       | 47.4 (45.9, 48.9) | 48.0 (46.8, 49.1) | 47.6 (46.5, 48.7) | 3.0 (2.8, 3.2)                     | 0.7 (0.6, 0.7)    | -0.4 (-1.1, 0.1)     | 2.6 (2.0, 3.1)       |
| Togo            | 70.4 (68.5, 72.3)       | 67.4 (65.5, 69.2) | 74.0 (71.9, 76.3) | 71.4 (69.7, 73.1) | 4.9 (4.4, 5.4)                     | 11.0 (10.1, 12)   | -19.6 (-22.5, -17.0) | -2.0 (-3.1, -1.0)    |
| Tajikistan      | 83.2 (81.1, 85.2)       | 81.6 (79.6, 83.6) | 81.7 (79.5, 84.0) | 83.2 (81.2, 85.2) | 1.2 (1.0, 1.4)                     | 8.1 (7.1, 9.2)    | -3.5 (-6.5, -0.3)    | -1.3 (-1.9, -0.5)    |
| Timor-Leste     | 63.8 (62.2, 65.5)       | 63.8 (62.2, 65.5) | 65.5 (63.9, 67.2) | 64.6 (63.1, 66.1) | 11.2 (10.5, 12)                    | 10.7 (10, 11.5)   | -10.6 (-12, -9.3)    | 5.3 (4.4, 6.3)       |
| Tanzania        | 81.4 (79.4, 83.4)       | 78.2 (76.3, 80.1) | 80.5 (78.5, 82.7) | 81.7 (79.8, 83.7) | 6.4 (5.6, 7.3)                     | 16.1 (14.4, 18.1) | -14.3 (-17.1, -11.4) | -0.3 (-1.4, 1.0)     |
| Uganda          | 71.1 (69.1, 73.1)       | 70.8 (68.8, 72.8) | 72.1 (69.8, 74.6) | 71.4 (69.7, 73.1) | 3.8 (3.5, 4.2)                     | 9.0 (8.3, 9.8)    | -9.4 (-12.3, -6.8)   | 0.2 (-0.9, 1.2)      |
| Yemen           | 63.5 (61.7, 65.3)       | 63.0 (61.2, 64.9) | 67.5 (65.8, 69.2) | 65.5 (63.9, 67.0) | 11.9 (11.1, 12.9)                  | 18.3 (17, 19.7)   | -20.5 (-22.3, -18.8) | 1.6 (0.2, 3.0)       |
| Zambia          | 73.6 (71.7, 75.4)       | 72.7 (70.9, 74.5) | 73.9 (72.0, 75.9) | 74.0 (72.2, 75.7) | 7.9 (7.2, 8.7)                     | 13.2 (12.1, 14.5) | -13.7 (-16.2, -11.5) | 2.3 (1.2, 3.3)       |
| Zimbabwe        | 79.0 (77.1, 81.0)       | 76.7 (74.8, 78.5) | 79.2 (77.0, 81.4) | 79.4 (77.5, 81.3) | 7.2 (6.5, 8.1)                     | 12.7 (11.5, 14.1) | -16.6 (-19.0, -14.4) | 1.8 (0.8, 2.9)       |

**Table S5.2.** Change in the distribution of pneumonia cases by wealth quintile for four scenarios, compared to when no vaccines are available (Scenario 1).

| Country         | Total cases averted (%) |                  |                 |                   | Change in AUC (compared to S1) (%) |                   |                  |                   |
|-----------------|-------------------------|------------------|-----------------|-------------------|------------------------------------|-------------------|------------------|-------------------|
|                 | S2                      | S3               | S4              | S5                | S2 AUC                             | S3 AUC            | S4 AUC           | S5 AUC            |
| Armenia         | 6.6 (0.0, 15.2)         | 5.9 (0.0, 14.5)  | 6.3 (0.0, 14.8) | 16.1 (9.7, 22.3)  | 0.1 (0.0, 0.2)                     | 0.3 (0.1, 0.6)    | -0.3 (-1.2, 0.5) | -5.7 (-7.4, -3.9) |
| Burundi         | 6.8 (0.3, 13.4)         | 6.7 (0.2, 13.2)  | 6.7 (0.2, 12.8) | 7.6 (3.7, 11.7)   | 0.0 (0.0, 0.0)                     | 0.1 (0.0, 0.1)    | 0.0 (-1.0, 1.0)  | -1.1 (-3.3, 0.5)  |
| Benin           | 5.0 (0.0, 10.5)         | 5.0 (0.0, 10.5)  | 5.2 (0.0, 10.4) | 9.1 (5.5, 12.4)   | 0.4 (0.1, 0.6)                     | 0.4 (0.1, 0.6)    | -0.4 (-1.1, 0.4) | -4.3 (-4.9, -3.6) |
| Burkina Faso    | 6.5 (2.1, 10.9)         | 6.4 (2.1, 10.7)  | 6.5 (2.2, 10.7) | 7.8 (4.3, 11.5)   | 0.1 (0.0, 0.1)                     | 0.2 (0.1, 0.4)    | -0.2 (-1.1, 0.6) | -3.2 (-4.0, -2.4) |
| Bangladesh      | 6.6 (2.3, 11.0)         | 6.4 (2.3, 10.7)  | 6.5 (2.3, 10.7) | 8.8 (5.7, 12.1)   | 0.1 (0.0, 0.2)                     | 0.3 (0.1, 0.5)    | -0.3 (-1.2, 0.6) | -4.0 (-4.9, -3.1) |
| Cote d'Ivoire   | 5.4 (0.7, 9.7)          | 5.4 (0.8, 9.7)   | 5.4 (1.0, 9.6)  | 5.4 (2.4, 8.6)    | 0.5 (0.2, 0.8)                     | 0.1 (0.0, 0.2)    | -0.1 (-0.9, 0.7) | -1.5 (-2.7, -0.5) |
| Cameroon        | 2.5 (0.0, 12.3)         | 2.5 (0.0, 12.4)  | 6.1 (0.0, 15.8) | 11.0 (6.2, 16.7)  | 0.8 (0.3, 1.3)                     | 0.3 (0.1, 0.5)    | -0.5 (-1.3, 0.4) | -6.3 (-8.6, -4.1) |
| DRC             | 5.5 (0.0, 12.0)         | 5.4 (0.0, 12.0)  | 5.9 (0.0, 12.4) | 9.6 (4.9, 14.4)   | 0.5 (0.2, 0.8)                     | 0.4 (0.1, 0.6)    | -0.4 (-1.1, 0.4) | -3.5 (-4.2, -2.7) |
| Congo           | 6.0 (0.3, 11.8)         | 6.0 (0.2, 11.8)  | 6.3 (0.3, 11.8) | 6.9 (3.7, 10.7)   | 0.5 (0.2, 0.8)                     | 0.2 (0.1, 0.3)    | -0.2 (-1.1, 0.7) | -2.2 (-3.7, -0.5) |
| Comoros         | NA                      | NA               | NA              | NA                | NA                                 | NA                | NA               | NA                |
| Ethiopia        | 5.0 (0.0, 13.3)         | 5.0 (0.0, 13.4)  | 5.6 (0.0, 13.8) | 9.2 (4.6, 14.9)   | 0.7 (0.3, 1.1)                     | 0.3 (0.1, 0.5)    | -0.3 (-1.2, 0.6) | -4.0 (-5.4, -0.7) |
| Ghana           | 6.8 (0.0, 15.4)         | 6.7 (0.0, 15.2)  | 6.7 (0.0, 15.0) | 8.4 (4.0, 13.4)   | 0.1 (0.0, 0.1)                     | 0.0 (-0.1, 0.0)   | 0.0 (-1.0, 1.1)  | 0.1 (-4.2, 3.4)   |
| Guinea          | NA                      | NA               | NA              | NA                | NA                                 | NA                | NA               | NA                |
| Gambia          | 6.9 (1.4, 12.2)         | 6.7 (1.3, 11.9)  | 6.6 (1.4, 11.7) | 8.1 (4.5, 11.5)   | -0.1 (-0.1, 0.0)                   | 0.0 (0.0, 0.0)    | 0.0 (-0.8, 0.9)  | 0.3 (-0.4, 1.1)   |
| Honduras        | 6.1 (0.0, 12.2)         | 6.0 (0.0, 12.1)  | 6.2 (0.0, 11.9) | 8.9 (3.5, 13.2)   | 0.0 (0.0, 0.1)                     | -0.3 (-0.4, -0.1) | 0.3 (-0.6, 1.1)  | 2.8 (1.2, 3.7)    |
| Haiti           | 2.0 (-3.0, 7.0)         | 2.0 (0.0, 7.0)   | 2.0 (0.0, 7.0)  | 5.2 (2.3, 8.5)    | 0.1 (0.0, 0.1)                     | 0.0 (0.0, 0.0)    | 0.0 (-0.3, 0.2)  | 1.4 (0.7, 1.9)    |
| Indonesia       | NA                      | NA               | NA              | NA                | NA                                 | NA                | NA               | NA                |
| Kenya           | 5.8 (0.8, 10.6)         | 5.8 (0.8, 10.6)  | 5.9 (1.0, 10.4) | 10.4 (7.1, 13.7)  | 0.1 (0.0, 0.2)                     | 0.4 (0.2, 0.7)    | -0.4 (-1.2, 0.4) | -4.2 (-5.3, -3.1) |
| Kyrgyz Republic | 5.5 (0.0, 12.4)         | 5.5 (0.0, 12.4)  | 5.5 (0.0, 12.2) | 6.0 (2.6, 9.7)    | -0.3 (-0.4, -0.1)                  | 0.1 (0.0, 0.1)    | -0.1 (-0.8, 0.7) | -1.2 (-2.5, -0.1) |
| Cambodia        | 6.5 (0.0, 14.8)         | 6.5 (0.0, 14.9)  | 6.7 (0.0, 14.7) | 7.0 (3.8, 10.7)   | 0.3 (0.1, 0.5)                     | -0.1 (-0.1, 0.0)  | 0.0 (-1.0, 1.1)  | 0.9 (-3.0, 5.5)   |
| Liberia         | 4.9 (0.0, 11.1)         | 4.9 (0.0, 11.1)  | 4.9 (0.0, 10.9) | 5.3 (2.3, 8.9)    | 0.3 (0.1, 0.5)                     | 0.1 (0.0, 0.1)    | -0.1 (-0.8, 0.6) | -1.3 (-3.5, 1.5)  |
| Lesotho         | 6.2 (0.0, 13.7)         | 6.2 (0.0, 13.6)  | 6.2 (0.0, 13.3) | 7.5 (3.6, 12.5)   | 0.0 (0.0, 0.0)                     | 0.3 (0.1, 0.5)    | -0.3 (-1.2, 0.6) | -4.0 (-6.3, -1.6) |
| Mali            | 5.4 (0.0, 11.1)         | 5.4 (0.0, 11.1)  | 5.7 (0.0, 11.5) | 10.0 (5.5, 14.1)  | 0.5 (0.2, 0.8)                     | 0.4 (0.2, 0.7)    | -0.4 (-1.1, 0.3) | -4.0 (-4.8, -3.1) |
| Mozambique      | 5.5 (0.0, 12.3)         | 5.3 (0.0, 12.2)  | 5.8 (0.0, 12.3) | 14.1 (10.5, 17.9) | 0.3 (0.1, 0.5)                     | 0.6 (0.2, 0.9)    | -0.6 (-1.3, 0.2) | -6.3 (-7.9, -4.8) |
| Malawi          | 6.5 (0.0, 16.4)         | 6.0 (0.0, 15.8)  | 6.3 (0.0, 16.0) | 14.2 (7.2, 21.4)  | 0.0 (0.0, 0.1)                     | 0.4 (0.2, 0.7)    | -0.4 (-1.2, 0.4) | -6.3 (-7.6, -4.7) |
| Niger           | 4.8 (0.0, 10.1)         | 4.8 (0.0, 10.1)  | 5.0 (0.0, 10.1) | 9.4 (6.0, 12.8)   | 0.5 (0.2, 0.8)                     | 0.3 (0.1, 0.6)    | -0.4 (-1.1, 0.4) | -4.0 (-4.8, -3.2) |
| Nigeria         | 4.0 (0.6, 7.3)          | 4.0 (0.8, 7.1)   | 4.9 (1.4, 8.3)  | 7.9 (6.0, 9.9)    | 1.3 (0.4, 2.1)                     | 0.3 (0.1, 0.5)    | -0.3 (-1.0, 0.4) | -3.7 (-4.2, -3.1) |
| Nepal           | 6.5 (0.0, 15.1)         | 6.5 (0.0, 15.1)  | 6.5 (0.0, 14.5) | 7.1 (3.2, 11.7)   | 0.2 (0.1, 0.3)                     | 0.0 (-0.1, 0.0)   | 0.0 (-0.9, 1.0)  | 0.6 (-2.0, 3.6)   |
| Pakistan        | 5.0 (0.0, 11.0)         | 5.0 (0.0, 11.0)  | 5.4 (0.0, 11.4) | 10.0 (5.8, 13.7)  | 0.9 (0.4, 1.4)                     | 0.5 (0.2, 0.7)    | -0.5 (-1.3, 0.4) | -5.7 (-6.7, -4.8) |
| Rwanda          | 6.9 (0.8, 12.9)         | 6.4 (0.5, 12.2)  | 6.7 (0.5, 12.6) | 13 (8.3, 17.3)    | 0.0 (0.0, 0.1)                     | 0.1 (0.0, 0.1)    | 0.0 (-1.1, 1.1)  | -1.0 (-3.0, 0.7)  |
| Senegal         | 6.4 (0.0, 13.0)         | 6.4 (0.0, 13.0)  | 6.4 (0.0, 12.5) | 7.2 (3.1, 11.9)   | 0.1 (0.0, 0.2)                     | 0.2 (0.1, 0.3)    | -0.2 (-1.1, 0.7) | -2.2 (-4.2, -0.1) |
| Sierra Leone    | 6.3 (0.8, 11.6)         | 6.3 (0.8, 11.6)  | 6.3 (1.0, 11.4) | 6.5 (3.1, 10.2)   | -0.1 (-0.1, 0.0)                   | 0.1 (0.0, 0.1)    | -0.1 (-0.9, 0.8) | -1.0 (-1.9, 0.2)  |
| Chad            | NA                      | NA               | NA              | NA                | NA                                 | NA                | NA               | NA                |
| Togo            | 6.2 (0.0, 12.5)         | 6.0 (-0.4, 12.2) | 6.4 (0.0, 12.7) | 10.7 (6.1, 15.5)  | 0.1 (0.0, 0.1)                     | 0.2 (0.1, 0.4)    | -0.4 (-1.1, 0.4) | -2.8 (-3.6, -2.0) |
| Tajikistan      | NA                      | NA               | NA              | NA                | NA                                 | NA                | NA               | NA                |
| Timor-Leste     | NA                      | NA               | NA              | NA                | NA                                 | NA                | NA               | NA                |
| Tanzania        | 6.7 (0.1, 13.0)         | 6.6 (0.1, 12.9)  | 6.7 (0.3, 12.7) | 7.5 (3.7, 11.3)   | 0.1 (0.1, 0.2)                     | 0.0 (0.0, 0.0)    | 0.0 (-1.0, 1.1)  | 0.1 (-2.6, 2.5)   |
| Uganda          | 5.6 (0.0, 12.8)         | 5.6 (0.0, 12.8)  | 5.6 (0.0, 12.6) | 6.4 (3.0, 10.8)   | 0.0 (0.0, 0.0)                     | 0.0 (0.0, 0.0)    | 0.0 (-0.8, 0.7)  | -0.2 (-1.0, 1.2)  |
| Yemen           | 5.8 (0.4, 11.3)         | 5.8 (0.4, 11.2)  | 6.2 (0.9, 11.6) | 8.6 (5.4, 11.9)   | 0.5 (0.2, 0.9)                     | 0.4 (0.2, 0.7)    | -0.3 (-1.3, 0.5) | -5.2 (-6.5, -3.8) |
| Zambia          | 6.2 (0.4, 11.8)         | 6.2 (0.4, 11.8)  | 6.2 (0.4, 11.8) | 7.1 (3.8, 10.3)   | 0.3 (0.1, 0.4)                     | 0.1 (0.1, 0.2)    | -0.1 (-1.1, 0.8) | -2.0 (-3.2, -0.4) |
| Zimbabwe        | 6.5 (1.7, 11.4)         | 6.2 (1.5, 10.8)  | 6.5 (1.7, 11.3) | 11.2 (7.6, 15.1)  | 0.2 (0.1, 0.4)                     | 0.2 (0.1, 0.4)    | -0.3 (-1.2, 0.5) | -3.2 (-3.8, -2.7) |

N/A: estimates not available due to no vaccine introduction in 2016.

**Table S5.3.** Change in the distribution of diarrhea cases by wealth quintile for four scenarios, compared to when no vaccines are available (Scenario 1).

| Country         | Total cases averted (%) |                  |                  |                   | Change in AUC (compared to S1) (%) |                |                  |                    |
|-----------------|-------------------------|------------------|------------------|-------------------|------------------------------------|----------------|------------------|--------------------|
|                 | S2                      | S3               | S4               | S5                | S2 AUC                             | S3 AUC         | S4 AUC           | S5 AUC             |
| Armenia         | 13.3 (0.2, 26.3)        | 11.5 (0.0, 23.0) | 13.1 (0.5, 26.5) | 23.6 (13.4, 33.8) | 0.1 (0.0, 0.3)                     | 1.1 (0.1, 2.4) | -0.8 (-4.1, 1.9) | -8.8 (-10.6, -7.3) |
| Burundi         | 13.5 (1.7, 26.4)        | 13.5 (1.6, 26.3) | 13.4 (1.8, 26.2) | 13.7 (3.6, 26.1)  | 0.0 (0.0, 0.1)                     | 0.6 (0.1, 1.3) | -0.5 (-3.7, 2.5) | -3.6 (-5.3, -2.1)  |
| Benin           | NA                      | NA               | NA               | NA                | NA                                 | NA             | NA               | NA                 |
| Burkina Faso    | 12.8 (1.8, 24.8)        | 12.3 (1.7, 24.0) | 13.0 (2.1, 25.2) | 15.8 (7.0, 26.2)  | 0.2 (0.0, 0.5)                     | 0.7 (0.1, 1.5) | -0.9 (-3.9, 1.5) | -4.9 (-6.8, -3.3)  |
| Bangladesh      | NA                      | NA               | NA               | NA                | NA                                 | NA             | NA               | NA                 |
| Cote d'Ivoire   | 7.3 (0.0, 14.8)         | 7.3 (0.0, 14.8)  | 7.6 (0.4, 15.2)  | 10.5 (5.8, 16.2)  | 0.5 (0.1, 0.9)                     | 0.6 (0.1, 1.3) | -0.7 (-2.6, 0.9) | -5.5 (-6.8, -4.2)  |
| Cameroon        | 11.8 (0.9, 23.3)        | 10.3 (0.5, 20.7) | 12.3 (0.8, 24.9) | 24.6 (18.3, 32.2) | 1.0 (0.1, 2.0)                     | 1.5 (0.2, 3.2) | -1.5 (-4.4, 0.8) | -11 (-12.8, -9.3)  |
| DRC             | NA                      | NA               | NA               | NA                | NA                                 | NA             | NA               | NA                 |
| Congo           | 12.5 (1.1, 24.4)        | 12.0 (1, 23.4)   | 12.7 (1.3, 25.4) | 17.0 (9.0, 26.5)  | 0.8 (0.1, 1.7)                     | 1.1 (0.1, 2.4) | -1.2 (-4.1, 1.4) | -7.2 (-8.9, -5.3)  |
| Comoros         | NA                      | NA               | NA               | NA                | NA                                 | NA             | NA               | NA                 |
| Ethiopia        | 11.1 (1.3, 21.2)        | 10.9 (1.2, 20.9) | 12.6 (1.3, 24.0) | 16.7 (9.6, 23.1)  | 1.0 (0.1, 2.0)                     | 1.2 (0.1, 2.5) | -1.5 (-4.0, 1.0) | -6.5 (-7.8, -4.9)  |
| Ghana           | 13.7 (1.2, 26.8)        | 13.1 (1.1, 25.8) | 13.4 (1.7, 26)   | 15.0 (6.2, 26.4)  | 0.1 (0.0, 0.2)                     | 0.8 (0.1, 1.7) | -0.6 (-4, 2.4)   | -5.8 (-7.4, -4.1)  |
| Guinea          | NA                      | NA               | NA               | NA                | NA                                 | NA             | NA               | NA                 |
| Gambia          | 13.5 (1.9, 26.2)        | 13.4 (1.9, 26.1) | 13.2 (2.1, 25.5) | 14.0 (4.5, 26.1)  | 0.0 (0.0, 0.0)                     | 0.1 (0.0, 0.1) | 0.0 (-2.9, 2.7)  | 0.2 (-0.4, 0.7)    |
| Honduras        | 12.8 (1.6, 24.9)        | 12.8 (1.6, 24.9) | 12.9 (1.8, 24.9) | 13.1 (3.7, 24.7)  | 0.0 (0.0, 0.1)                     | 0.6 (0.1, 1.2) | -0.6 (-3.8, 2.2) | -3.3 (-4.5, -2.0)  |
| Haiti           | 10.6 (0.4, 21.1)        | 10.2 (0.3, 20.5) | 11.4 (0.7, 22.6) | 16.3 (8.6, 24.8)  | 0.5 (0.1, 1.0)                     | 0.7 (0.1, 1.5) | -0.8 (-3.7, 1.4) | -3.6 (-5.5, -2.0)  |
| Indonesia       | NA                      | NA               | NA               | NA                | NA                                 | NA             | NA               | NA                 |
| Kenya           | 12 (1.1, 23.6)          | 11.8 (0.9, 23.2) | 12.1 (1.3, 23.9) | 15.8 (8.9, 23.8)  | 0.1 (0.0, 0.2)                     | 1.2 (0.2, 2.6) | -1.1 (-4.0, 1.4) | -7.4 (-9.9, -5.0)  |
| Kyrgyz Republic | NA                      | NA               | NA               | NA                | NA                                 | NA             | NA               | NA                 |
| Cambodia        | NA                      | NA               | NA               | NA                | NA                                 | NA             | NA               | NA                 |
| Liberia         | 6.8 (0.6, 13.3)         | 6.8 (0.6, 13.3)  | 6.9 (0.6, 13.7)  | 9.5 (4.9, 14.4)   | 0.2 (0.0, 0.4)                     | 0.5 (0.1, 1.0) | -0.5 (-2.1, 0.9) | -4.3 (-5.5, -3.1)  |
| Lesotho         | NA                      | NA               | NA               | NA                | NA                                 | NA             | NA               | NA                 |
| Mali            | 10.7 (1.5, 20.6)        | 10.6 (1.5, 20.5) | 11.4 (1.6, 22.1) | 16.8 (10.6, 23.4) | 0.6 (0.1, 1.3)                     | 1.3 (0.2, 2.6) | -1.2 (-3.8, 1.1) | -6.2 (-8.3, -4.4)  |
| Mozambique      | 10.5 (1.2, 20.7)        | 10.2 (1.1, 20.0) | 11.3 (1.3, 22.2) | 19.3 (13.2, 25.7) | 0.4 (0.1, 0.9)                     | 1.5 (0.2, 3.2) | -1.5 (-4.4, 0.8) | -8.7 (-10.7, -7.1) |
| Malawi          | 13.2 (0.5, 26.3)        | 11.8 (0.3, 23.4) | 13.0 (0.2, 26.1) | 21.4 (11.9, 31.1) | 0.0 (0.0, 0.1)                     | 1.1 (0.1, 2.3) | -1.2 (-4.0, 1.2) | -8.6 (-11.3, -6.4) |
| Niger           | 10.8 (1.1, 21.2)        | 10.8 (1.1, 21.1) | 11.4 (1.1, 22.5) | 14.1 (7.9, 21.7)  | 0.9 (0.1, 1.8)                     | 1.0 (0.1, 2.1) | -1.1 (-3.8, 1.4) | -5.6 (-6.6, -4.2)  |
| Nigeria         | NA                      | NA               | NA               | NA                | NA                                 | NA             | NA               | NA                 |
| Nepal           | NA                      | NA               | NA               | NA                | NA                                 | NA             | NA               | NA                 |
| Pakistan        | NA                      | NA               | NA               | NA                | NA                                 | NA             | NA               | NA                 |
| Rwanda          | 13.7 (1.4, 26.7)        | 13.1 (1.4, 25.5) | 13.3 (1.7, 26.0) | 15.9 (6.5, 26.9)  | 0.1 (0.0, 0.1)                     | 0.9 (0.1, 1.9) | -0.6 (-4.0, 2.4) | -6.0 (-7.3, -4.8)  |
| Senegal         | 12.9 (0.8, 25.3)        | 12.8 (0.7, 25.1) | 13.0 (0.9, 25.6) | 13.5 (3.7, 25.0)  | 0.2 (0.0, 0.5)                     | 0.7 (0.1, 1.6) | -0.6 (-3.8, 2.2) | -3.9 (-5.9, -1.5)  |
| Sierra Leone    | 12.8 (1.6, 24.8)        | 12.7 (1.6, 24.7) | 12.8 (1.9, 24.9) | 13.6 (5.1, 24.7)  | 0.0 (0.0, 0.0)                     | 0.6 (0.1, 1.2) | -0.6 (-3.6, 1.9) | -3.7 (-4.9, -1.8)  |
| Chad            | NA                      | NA               | NA               | NA                | NA                                 | NA             | NA               | NA                 |
| Togo            | 12.4 (1.2, 24.3)        | 11.3 (1.0, 22.2) | 13.1 (1.3, 25.8) | 20.8 (12.5, 30.2) | 0.1 (0.0, 0.3)                     | 0.8 (0.1, 1.8) | -1.1 (-4.1, 1.3) | -6.2 (-7.9, -4.5)  |
| Tajikistan      | 13.5 (1.7, 26.3)        | 13.4 (1.7, 26.0) | 13.5 (1.9, 25.9) | 14.1 (5.0, 26.1)  | -0.1 (-0.3, 0.0)                   | 0.4 (0.0, 0.9) | -0.2 (-3.7, 3.0) | -2.5 (-3.3, -1.4)  |
| Timor-Leste     | NA                      | NA               | NA               | NA                | NA                                 | NA             | NA               | NA                 |
| Tanzania        | 13.5 (1.7, 26.3)        | 13.3 (1.7, 25.9) | 13.2 (1.8, 25.6) | 14.2 (5.2, 26.1)  | 0.2 (0.0, 0.5)                     | 0.8 (0.1, 1.8) | -0.6 (-3.8, 2.4) | -5.4 (-6.4, -4.1)  |
| Uganda          | 2.5 (0.0, 7.7)          | 2.5 (0.0, 7.7)   | 2.5 (0.0, 7.7)   | 7.6 (5.2, 10.3)   | 0.0 (0.0, 0.0)                     | 0.2 (0.0, 0.3) | -0.1 (-0.7, 0.3) | -2.3 (-3.3, -1.5)  |
| Yemen           | 12.1 (1.6, 23.6)        | 12.0 (1.6, 23.4) | 12.5 (2.0, 24.2) | 14.6 (8.8, 24.0)  | 0.9 (0.1, 1.9)                     | 1.3 (0.2, 2.8) | -1.1 (-4.1, 1.6) | -7.6 (-8.8, -5.8)  |
| Zambia          | 12.6 (1.7, 24.6)        | 12.5 (1.6, 24.4) | 12.7 (2.0, 24.7) | 13.6 (5.5, 24.5)  | 0.3 (0.0, 0.7)                     | 0.8 (0.1, 1.6) | -0.7 (-3.9, 2.1) | -4.6 (-5.6, -3.4)  |
| Zimbabwe        | 13.1 (1.6, 25.5)        | 12.2 (1.4, 23.7) | 13.2 (2.1, 25.5) | 19.0 (10.3, 29.0) | 0.3 (0.0, 0.6)                     | 0.9 (0.1, 1.9) | -1.0 (-4.2, 1.4) | -6.5 (-8.1, -5.2)  |

N/A: estimates not available due to no vaccine introduction in 2016.

**Table S5.4.** Change in the distribution of measles deaths by wealth quintile for four scenarios, compared to when no treatment is available (Scenario 1).

| Country         | Total cases averted (%) |                   |                   |                   | Change in AUC (compared to S1) (%) |                |                   |                      |
|-----------------|-------------------------|-------------------|-------------------|-------------------|------------------------------------|----------------|-------------------|----------------------|
|                 | S2                      | S3                | S4                | S5                | S2 AUC                             | S3 AUC         | S4 AUC            | S5 AUC               |
| Armenia         | 19.4 (5.5, 30.9)        | 20.0 (5.8, 31.9)  | 20.6 (6.3, 32.7)  | 20.0 (5.9, 31.7)  | 3.1 (0.8, 5.6)                     | 0.0 (0.0, 0.0) | -2.2 (-5.9, 2.1)  | -4.5 (-7.2, -1.7)    |
| Burundi         | 33.5 (9.9, 53.2)        | 33.6 (9.9, 53.4)  | 34.3 (10.2, 54.3) | 33.6 (10.0, 53.3) | 0.5 (0.1, 1.0)                     | 0.0 (0.0, 0.0) | -3.8 (-11.7, 4.5) | -6.0 (-7.5, -4.6)    |
| Benin           | 20.1 (5.6, 32.0)        | 20.3 (5.7, 32.4)  | 20.7 (6.0, 33.0)  | 20.3 (6.0, 32.2)  | 1.8 (0.4, 3.1)                     | 0.0 (0.0, 0.0) | -1.9 (-5.5, 2.4)  | -4.9 (-6.1, -3.6)    |
| Burkina Faso    | 29.6 (9.0, 47.0)        | 30.3 (9.2, 48.1)  | 30.9 (8.9, 48.8)  | 30.3 (9.0, 48.0)  | 4.6 (1.0, 9)                       | 0.0 (0.0, 0.0) | -3.3 (-9.7, 3.7)  | -2.1 (-5.9, 2.6)     |
| Bangladesh      | 18.2 (5.3, 29.0)        | 19.1 (5.5, 30.6)  | 19.6 (5.6, 31.1)  | 19.1 (5.7, 30.3)  | 3.8 (1.0, 6.7)                     | 0.0 (0.0, 0.0) | -2.0 (-5.4, 1.8)  | -3.7 (-7.1, -0.2)    |
| Cote d'Ivoire   | 18.8 (5.0, 30.2)        | 19.4 (5.3, 31.0)  | 19.9 (6.2, 31.8)  | 19.4 (5.7, 30.7)  | 2.6 (0.6, 4.6)                     | 0.0 (0.0, 0.0) | -2.2 (-5.7, 1.9)  | -5.7 (-8.0, -3.4)    |
| Cameroon        | 15.9 (3.7, 26.5)        | 17.4 (4.4, 28.2)  | 19.0 (5.5, 30.3)  | 17.4 (5.2, 27.6)  | 3.1 (0.8, 5.4)                     | 0.0 (0.0, 0.0) | -3.2 (-6.8, 0.7)  | -10.7 (-13.7, -7.8)  |
| DRC             | 24.2 (7.2, 38.5)        | 24.1 (7.2, 38.2)  | 25.7 (7.3, 40.7)  | 24.1 (7.1, 38.2)  | 0.1 (0.0, 0.3)                     | 0.0 (0.0, 0.0) | -3.4 (-7.6, 1.1)  | -12.1 (-12.9, -11.5) |
| Congo           | 26.1 (7.6, 41.5)        | 27.0 (7.8, 43.0)  | 27.9 (8.1, 44.1)  | 27.0 (8.0, 42.8)  | 3.4 (0.8, 6.5)                     | 0.0 (0.0, 0.0) | -3.6 (-8.9, 2.4)  | -5.1 (-8.7, -1.3)    |
| Comoros         | 23.8 (6.9, 37.9)        | 23.6 (6.8, 37.6)  | 24.4 (7.1, 38.6)  | 23.6 (7.0, 37.4)  | -0.1 (-0.2, 0.0)                   | 0.0 (0.0, 0.0) | -2.9 (-7.6, 2.3)  | -8.7 (-9.7, -7.4)    |
| Ethiopia        | 18.4 (5.9, 28.9)        | 19.7 (6.2, 31.0)  | 20.4 (6.9, 31.8)  | 19.7 (6.3, 30.7)  | 4.2 (1.1, 7.3)                     | 0.0 (0.0, 0.0) | -2.2 (-5.9, -1.6) | -4.3 (-7.9, -0.4)    |
| Ghana           | 26.9 (7.6, 42.7)        | 26.5 (7.5, 42.0)  | 27.2 (8.1, 43.0)  | 26.5 (7.8, 42.0)  | -1.7 (-3.3, -0.4)                  | 0.0 (0.0, 0.0) | -2.9 (-8.6, 3.4)  | -8.0 (-9.8, -6.3)    |
| Guinea          | 21.8 (6.2, 34.9)        | 23.7 (6.9, 37.8)  | 24.8 (7.2, 39.2)  | 23.7 (7.0, 37.6)  | 5.3 (1.3, 9.6)                     | 0.0 (0.0, 0.0) | -3.1 (-7.2, 1.7)  | -3.8 (-8.7, 1.5)     |
| Gambia          | 40.4 (12.1, 64.2)       | 40.3 (12.1, 64.1) | 40.6 (11.5, 64.7) | 40.3 (12.0, 64.0) | -0.9 (-2.1, -0.2)                  | 0.0 (0.0, 0.0) | -2.1 (-11.4, 7.8) | -3.6 (-5.0, -2.4)    |
| Honduras        | 34.9 (10.6, 55.4)       | 34.9 (10.6, 55.5) | 35.1 (10.2, 55.8) | 34.9 (10.4, 55.4) | 1.1 (0.2, 2.4)                     | 0.0 (0.0, 0.0) | -2.3 (-10.7, 7.1) | -2.1 (-3.4, -0.7)    |
| Haiti           | 21.8 (6.5, 34.7)        | 22.1 (6.6, 35.2)  | 22.2 (6.6, 35.3)  | 22.1 (6.6, 35.1)  | 3.9 (0.9, 7.1)                     | 0.0 (0.0, 0.0) | -1.1 (-5.0, 3.3)  | 0.6 (-2.6, 4.0)      |
| Indonesia       | 41.9 (12.8, 66.6)       | 42.0 (12.8, 66.7) | 42.9 (12.8, 68.0) | 42.0 (12.5, 66.6) | 1.3 (0.2, 3.1)                     | 0.0 (0.0, 0.0) | -5.9 (-17.7, 5.9) | -6.0 (-7.1, -4.6)    |
| Kenya           | 36.8 (11.3, 58.5)       | 36.8 (11.3, 58.6) | 38.0 (11.2, 60.3) | 36.8 (10.9, 58.4) | 0.1 (0.0, 0.2)                     | 0.0 (0.0, 0.0) | -5.8 (-15.3, 4.0) | -8.5 (-9.6, -7.5)    |
| Kyrgyz Republic | 30.5 (9.1, 48.6)        | 30.6 (9.1, 48.7)  | 30.7 (8.9, 48.7)  | 30.6 (9.1, 48.5)  | 5.3 (1.1, 10.5)                    | 0.0 (0.0, 0.0) | -1.0 (-7.8, 6.7)  | 3.8 (-0.5, 9.1)      |
| Cambodia        | 37.0 (11.3, 58.8)       | 36.9 (11.3, 58.6) | 37.6 (11.2, 59.6) | 36.9 (10.9, 58.5) | -1.2 (-2.6, -0.2)                  | 0.0 (0.0, 0.0) | -4.5 (-13.9, 4.9) | -8.0 (-9.7, -6.7)    |
| Liberia         | 29.3 (8.8, 46.6)        | 29.2 (8.8, 46.4)  | 29.8 (8.6, 47.2)  | 29.2 (8.7, 46.3)  | -0.2 (-0.4, 0.0)                   | 0.0 (0.0, 0.0) | -3.3 (-9.3, 3.2)  | -7.7 (-8.4, -7.1)    |
| Lesotho         | 34.1 (10, 54.2)         | 34.0 (10.0, 54.0) | 35.2 (10.6, 55.6) | 34.0 (10.1, 53.9) | -0.6 (-1.2, -0.1)                  | 0.0 (0.0, 0.0) | -5.1 (-13.2, 3.2) | -9.3 (-11.3, -7.3)   |
| Mali            | 18.4 (5.4, 29.3)        | 19.6 (5.9, 31.3)  | 20.5 (5.7, 32.6)  | 19.6 (5.8, 31.1)  | 3.5 (0.9, 6.2)                     | 0.0 (0.0, 0.0) | -2.4 (-5.6, 1.3)  | -6.0 (-9.0, -2.9)    |
| Mozambique      | 31.3 (9.3, 49.8)        | 32.4 (9.7, 51.6)  | 35.1 (10.7, 55.6) | 32.4 (9.6, 51.4)  | 2.9 (0.6, 5.8)                     | 0.0 (0.0, 0.0) | -7.1 (-15.4, 1.4) | -10.3 (-12.9, -6.9)  |
| Malawi          | 39.3 (11.6, 62.6)       | 39.5 (11.7, 62.8) | 41.0 (11.8, 65.0) | 39.5 (11.7, 62.6) | 1.0 (0.2, 2.2)                     | 0.0 (0.0, 0.0) | -6.8 (-17.8, 4.0) | -8.5 (-10.5, -6.3)   |
| Niger           | 30.9 (8.8, 49.3)        | 31.6 (9.0, 50.3)  | 32.4 (9.3, 51.4)  | 31.6 (9.4, 50.2)  | 4.4 (0.9, 8.8)                     | 0.0 (0.0, 0.0) | -3.8 (-10.9, 3.9) | -2.8 (-6.3, 1.8)     |
| Nigeria         | 20.2 (6.1, 31.7)        | 21.2 (6.6, 33.5)  | 22.2 (7.3, 34.6)  | 21.3 (6.8, 33.1)  | 3.4 (0.9, 6.0)                     | 0.0 (0.0, 0.0) | -2.8 (-7.3, 1.6)  | -6.4 (-9.3, -3.2)    |
| Nepal           | 22.7 (6.3, 36.3)        | 22.8 (6.3, 36.5)  | 23.6 (6.8, 37.6)  | 22.8 (6.8, 36.2)  | 1.0 (0.2, 1.8)                     | 0.0 (0.0, 0.0) | -2.6 (-6.7, 2.0)  | -7.8 (-10.0, -5.9)   |
| Pakistan        | 37.7 (11.9, 58.9)       | 38.8 (12.2, 60.6) | 41.3 (13.7, 64.5) | 38.8 (12.5, 60.3) | 4.3 (0.9, 9.1)                     | 0.0 (0.0, 0.0) | -9.1 (-23.1, 3.6) | -7.1 (-11.1, -1.5)   |
| Rwanda          | 34.2 (10.1, 54.4)       | 34.7 (10.4, 55.1) | 35.3 (10.4, 56.0) | 34.7 (10.3, 55.1) | 3.5 (0.7, 7.4)                     | 0.0 (0.0, 0.0) | -3.9 (-12.2, 4.6) | -2.8 (-5.8, 1.5)     |
| Senegal         | 22.6 (6.6, 36.0)        | 22.5 (6.5, 35.8)  | 23.0 (6.7, 36.6)  | 22.5 (6.7, 35.6)  | -0.5 (-0.8, -0.1)                  | 0.0 (0.0, 0.0) | -2.5 (-6.7, 2.4)  | -8.1 (-9.7, -6.6)    |
| Sierra Leone    | 40.9 (12.3, 65.0)       | 41.0 (12.4, 65.2) | 41.5 (11.9, 65.9) | 41.0 (12.2, 65.1) | 1.4 (0.3, 3.3)                     | 0.0 (0.0, 0.0) | -3.3 (-13.6, 6.3) | -2.7 (-4.2, -0.7)    |
| Chad            | 15.7 (4.6, 25.1)        | 15.9 (4.7, 25.3)  | 15.9 (4.4, 25.4)  | 15.9 (4.7, 25.2)  | 3.1 (0.8, 5.4)                     | 0.0 (0.0, 0.0) | -0.2 (-2.6, 2.5)  | 2.5 (0.0, 5.0)       |
| Togo            | 23.3 (6.8, 37.0)        | 24.1 (7.0, 38.4)  | 25.0 (7.1, 39.7)  | 24.1 (7.1, 38.2)  | 1.5 (0.3, 2.7)                     | 0.0 (0.0, 0.0) | -2.6 (-6.6, 1.9)  | -6.7 (-8.5, -4.8)    |
| Tajikistan      | 32.2 (9.8, 51.3)        | 32.3 (9.8, 51.4)  | 32.5 (9.5, 51.5)  | 32.3 (9.6, 51.3)  | 1.8 (0.4, 3.6)                     | 0.0 (0.0, 0.0) | -1.0 (-8.4, 7.3)  | 0.3 (-1.2, 2.1)      |
| Timor-Leste     | 42.7 (12.9, 67.8)       | 42.9 (12.9, 68.2) | 43.6 (12.7, 69.2) | 42.9 (12.7, 68.1) | 2.0 (0.3, 4.7)                     | 0.0 (0.0, 0.0) | -5.1 (-16.5, 6.4) | -4.0 (-5.8, -1.3)    |
| Tanzania        | 31.6 (9.5, 50.2)        | 31.8 (9.6, 50.5)  | 32.5 (9.4, 51.5)  | 31.8 (9.4, 50.5)  | 1.3 (0.3, 2.6)                     | 0.0 (0.0, 0.0) | -3.8 (-11.1, 4.1) | -5.5 (-6.9, -3.9)    |
| Uganda          | 45.0 (13.6, 71.6)       | 45.0 (13.6, 71.5) | 45.4 (12.9, 72.3) | 45.0 (13.3, 71.4) | -0.4 (-0.9, -0.1)                  | 0.0 (0.0, 0.0) | -3.8 (-16, 8.7)   | -4.6 (-5.6, -3.7)    |
| Yemen           | 20.0 (5.9, 31.9)        | 20.4 (6.0, 32.6)  | 21.7 (6.5, 34.2)  | 20.4 (6.1, 32.4)  | 1.3 (0.3, 2.2)                     | 0.0 (0.0, 0.0) | -3.3 (-7.3, 1.3)  | -9.9 (-11.3, -8.5)   |
| Zambia          | 40.5 (12.2, 64.4)       | 40.6 (12.3, 64.6) | 41.4 (12.3, 65.8) | 40.6 (12.1, 64.5) | 1.4 (0.3, 3.3)                     | 0.0 (0.0, 0.0) | -5.0 (-16.1, 6.9) | -4.6 (-6.0, -2.6)    |
| Zimbabwe        | 24.9 (7.4, 39.6)        | 24.8 (7.4, 39.5)  | 25.3 (7.5, 40.0)  | 24.8 (7.4, 39.4)  | -0.4 (-0.7, -0.1)                  | 0.0 (0.0, 0.0) | -2.2 (-6.8, 2.9)  | -6.6 (-7.1, -6.1)    |

**Table S5.5.** Change in the distribution of pneumonia deaths by wealth quintile for four scenarios, compared to when no treatment is available (Scenario 1).

| Country         | Total cases averted (%) |                   |                   |                   | Change in AUC (compared to S1) (%) |                |                     |                     |
|-----------------|-------------------------|-------------------|-------------------|-------------------|------------------------------------|----------------|---------------------|---------------------|
|                 | S2                      | S3                | S4                | S5                | S2 AUC                             | S3 AUC         | S4 AUC              | S5 AUC              |
| Armenia         | 20.5 (13.1, 27.5)       | 21.8 (14.0, 28.9) | 24.7 (17.0, 31.8) | 21.8 (17.6, 26.1) | 2.9 (2.2, 3.7)                     | 0.0 (0.0, 0.0) | -3.9 (-6.0, -2.3)   | -11.3 (-13.2, -8.3) |
| Burundi         | 35.7 (28.0, 43.4)       | 35.7 (28.0, 43.4) | 35.9 (29.0, 42.9) | 35.7 (28.9, 42.7) | 1.0 (0.7, 1.3)                     | 0.0 (0.0, 0.0) | -1.4 (-4.7, 1.7)    | -1.3 (-3.8, 0.8)    |
| Benin           | 20.1 (14.2, 25.5)       | 20.3 (14.4, 25.7) | 20.9 (15.7, 25.8) | 20.3 (16.4, 24.2) | 1.8 (1.4, 2.3)                     | 0.0 (0.0, 0.0) | -1.9 (-3.5, -0.7)   | -5.6 (-6.1, -5.1)   |
| Burkina Faso    | 34.5 (27.7, 41.4)       | 35.2 (28.3, 42.2) | 35.6 (28.9, 42.4) | 35.2 (28.5, 42.1) | 6.1 (4.5, 8.1)                     | 0.0 (0.0, 0.0) | -2.8 (-5.9, -0.3)   | 1.0 (-0.8, 3.1)     |
| Bangladesh      | 23.5 (18.8, 28.4)       | 24.4 (19.5, 29.6) | 24.8 (19.9, 29.7) | 24.4 (19.7, 29.2) | 5.1 (3.8, 6.5)                     | 0.0 (0.0, 0.0) | -1.9 (-3.8, -0.4)   | -0.6 (-2.1, 1.0)    |
| Cote d'Ivoire   | 24.0 (18.1, 29.7)       | 24.4 (18.9, 29.9) | 24.5 (19.5, 29.7) | 24.4 (19.7, 29.2) | 4.6 (3.5, 5.9)                     | 0.0 (0.0, 0.0) | -1.1 (-3.0, 0.5)    | 1.1 (-0.4, 2.7)     |
| Cameroon        | 18.9 (10.4, 27.4)       | 21.0 (13.0, 29.0) | 23.4 (16.5, 29.9) | 21.0 (17.0, 25.2) | 3.8 (2.9, 4.8)                     | 0.0 (0.0, 0.0) | -4.4 (-6.5, -2.4)   | -11.8 (-15.5, -7.4) |
| DRC             | 27.0 (20.8, 33.1)       | 27.1 (20.9, 33.3) | 28.2 (22.0, 34.4) | 27.1 (22.0, 32.5) | 0.9 (0.6, 1.1)                     | 0.0 (0.0, 0.0) | -3.0 (-4.9, -1.4)   | -8.6 (-10, -6.9)    |
| Congo           | 34.2 (26.3, 42.0)       | 34.8 (26.8, 42.8) | 35.3 (27.8, 42.8) | 34.8 (27.5, 41.8) | 5.6 (4.0, 7.4)                     | 0.0 (0.0, 0.0) | -3.1 (-6.5, -0.3)   | 0.1 (-3.2, 3.4)     |
| Comoros         | 27.3 (20.5, 33.7)       | 27.4 (20.7, 33.9) | 28.3 (22.0, 34.3) | 27.4 (22.2, 32.8) | 1.0 (0.7, 1.3)                     | 0.0 (0.0, 0.0) | -3.3 (-5.6, -1.4)   | -7.6 (-9.6, -4.9)   |
| Ethiopia        | 19.1 (13.9, 24.5)       | 20.5 (14.4, 26.1) | 21.2 (15.8, 26.1) | 20.5 (16.5, 24.5) | 5.4 (4.1, 6.9)                     | 0.0 (0.0, 0.0) | -2.1 (-3.5, -0.8)   | -2.6 (-5.1, 0.5)    |
| Ghana           | 32.8 (24.4, 41.0)       | 32.7 (24.4, 40.9) | 33.2 (25.9, 40.3) | 32.7 (26.4, 39.1) | -0.9 (-1.1, -0.6)                  | 0.0 (0.0, 0.0) | -1.6 (-5.1, 1.5)    | -3.6 (-7.0, -0.5)   |
| Guinea          | 23.8 (17.6, 30.6)       | 26.6 (19.8, 33.3) | 27.8 (21.5, 33.9) | 26.6 (21.5, 31.8) | 8.0 (6.0, 10.3)                    | 0.0 (0.0, 0.0) | -3.5 (-5.5, -1.6)   | -0.6 (-3.7, 3.0)    |
| Gambia          | 44.3 (35.4, 53.2)       | 44.2 (35.4, 53.1) | 44.8 (36.3, 53.3) | 44.2 (35.7, 52.8) | -1.3 (-1.7, -0.9)                  | 0.0 (0.0, 0.0) | -0.1 (-3.9, 3.1)    | -1.5 (-2.3, -0.9)   |
| Honduras        | 42.5 (33.6, 51.6)       | 42.4 (33.5, 51.3) | 42.7 (34.3, 50.8) | 42.4 (34.3, 50.7) | 2.6 (1.8, 3.6)                     | 0.0 (0.0, 0.0) | 1.8 (-2.8, 5.6)     | 5.2 (1.7, 8.0)      |
| Haiti           | 25.1 (18.8, 31.2)       | 25.2 (18.7, 31.5) | 25.7 (19.7, 31.6) | 25.2 (20.4, 30.1) | 5.1 (3.8, 6.4)                     | 0.0 (0.0, 0.0) | -0.5 (-2.2, 0.9)    | 2.4 (0.7, 4.2)      |
| Indonesia       | 49.6 (39.7, 59.3)       | 49.7 (39.9, 59.5) | 50.4 (40.7, 60.2) | 49.7 (40.2, 59.4) | 2.9 (1.9, 4.3)                     | 0.0 (0.0, 0.0) | -4.5 (-10.7, 0.2)   | -2.0 (-3.3, -0.6)   |
| Kenya           | 42.9 (34.3, 51.7)       | 43.1 (34.5, 51.9) | 44.4 (35.9, 52.9) | 43.1 (34.9, 51.6) | 1.4 (1.0, 2.0)                     | 0.0 (0.0, 0.0) | -6.1 (-11, -2.5)    | -6.4 (-8.0, -5.2)   |
| Kyrgyz Republic | 33.1 (25.3, 40.9)       | 33.3 (25.5, 41.0) | 33.4 (26.6, 40.2) | 33.3 (27.0, 39.9) | 5.5 (4.0, 7.3)                     | 0.0 (0.0, 0.0) | -0.8 (-3.7, 1.8)    | 4.0 (1.4, 6.9)      |
| Cambodia        | 44.7 (35.2, 54.0)       | 44.8 (35.4, 54.1) | 45.0 (36.3, 53.7) | 44.8 (36.2, 53.6) | 0.0 (0.0, 0.1)                     | 0.0 (0.0, 0.0) | -2.2 (-7.5, 2.4)    | -2.5 (-4.5, 0.0)    |
| Liberia         | 32.9 (25.6, 40.2)       | 32.8 (25.6, 40.0) | 33.1 (26.3, 39.6) | 32.8 (26.5, 39.3) | -1.4 (-1.8, -1.0)                  | 0.0 (0.0, 0.0) | -2.0 (-4.8, 0.5)    | -5.6 (-7.4, -3.7)   |
| Lesotho         | 41.1 (31.4, 50.4)       | 41.1 (31.6, 50.4) | 42.0 (33.7, 50.3) | 41.1 (33.3, 49.2) | 0.4 (0.3, 0.6)                     | 0.0 (0.0, 0.0) | -5.2 (-10.4, -0.7)  | -6.7 (-11.1, -2.9)  |
| Mali            | 20.8 (15.8, 25.9)       | 22.3 (16.8, 27.5) | 23.0 (17.9, 28.0) | 22.3 (18.0, 26.7) | 5.0 (3.8, 6.3)                     | 0.0 (0.0, 0.0) | -2.3 (-3.9, -1.0)   | -3.2 (-5.0, -1.2)   |
| Mozambique      | 32.6 (25.4, 40.0)       | 33.9 (26.6, 41.5) | 36.9 (29.7, 44.4) | 33.9 (27.4, 40.6) | 3.5 (2.5, 4.5)                     | 0.0 (0.0, 0.0) | -7.5 (-11.2, -4.6)  | -10.2 (-12.1, -8.0) |
| Malawi          | 45.1 (34.4, 55.3)       | 45.7 (34.8, 56.0) | 49.0 (39.1, 58.9) | 45.7 (37.0, 54.7) | 2.8 (1.9, 3.9)                     | 0.0 (0.0, 0.0) | -10.8 (-16.8, -5.4) | -10.2 (-13.7, -5.5) |
| Niger           | 34.2 (26.5, 41.8)       | 35.1 (27.5, 42.6) | 36.2 (29.1, 43.4) | 35.1 (28.4, 42.0) | 7.7 (5.7, 10.3)                    | 0.0 (0.0, 0.0) | -4.1 (-7.5, -1.5)   | 0.7 (-1.6, 3.2)     |
| Nigeria         | 24.1 (19.4, 29.0)       | 25.5 (20.5, 30.7) | 26.2 (21.0, 31.7) | 25.5 (20.6, 30.6) | 4.7 (3.5, 6.0)                     | 0.0 (0.0, 0.0) | -2.9 (-4.5, -1.3)   | -3.5 (-4.9, -2.0)   |
| Nepal           | 26.0 (18.7, 33.0)       | 26.0 (18.7, 33.2) | 26.2 (20.1, 32.2) | 26.0 (21.0, 31.1) | 2.1 (1.6, 2.7)                     | 0.0 (0.0, 0.0) | -0.7 (-2.7, 0.9)    | -0.4 (-2.9, 2.1)    |
| Pakistan        | 41.5 (33.0, 50.1)       | 42.5 (33.8, 51.3) | 44.5 (35.8, 53.7) | 42.5 (34.3, 50.9) | 4.7 (3.3, 6.5)                     | 0.0 (0.0, 0.0) | -8.2 (-13.4, -3.9)  | -5.0 (-6.8, -3.0)   |
| Rwanda          | 41.9 (33.1, 50.5)       | 42.1 (33.2, 50.8) | 43.3 (34.7, 51.7) | 42.1 (34.0, 50.3) | 5.6 (3.9, 7.7)                     | 0.0 (0.0, 0.0) | -2.9 (-7.8, 1.3)    | 1.7 (-0.7, 4.1)     |
| Senegal         | 27.8 (20.7, 34.9)       | 27.5 (20.4, 34.4) | 27.8 (21.5, 33.8) | 27.5 (22.2, 32.9) | -1.6 (-2.1, -1.2)                  | 0.0 (0.0, 0.0) | -1.9 (-4.2, 0.1)    | -6.9 (-9.4, -4.2)   |
| Sierra Leone    | 46.8 (37.6, 56.2)       | 46.8 (37.6, 56.2) | 47.1 (38.1, 56.1) | 46.8 (37.8, 56.0) | 1.2 (0.8, 1.7)                     | 0.0 (0.0, 0.0) | -1.8 (-6.5, 2.0)    | -0.7 (-1.8, 0.6)    |
| Chad            | 17.5 (13.6, 21.8)       | 17.5 (13.6, 21.7) | 17.7 (13.9, 21.5) | 17.5 (14.2, 21.0) | 4.0 (3.1, 5.0)                     | 0.0 (0.0, 0.0) | 0.2 (-0.8, 1.1)     | 5.3 (4.2, 6.4)      |
| Togo            | 31.3 (24.3, 38.3)       | 32.5 (25.0, 39.8) | 33.7 (26.6, 40.8) | 32.5 (26.3, 38.9) | 2.6 (1.9, 3.5)                     | 0.0 (0.0, 0.0) | -3.0 (-5.6, -1.1)   | -4.3 (-5.5, -3.0)   |
| Tajikistan      | 36.5 (28.8, 44.5)       | 36.6 (29.0, 44.4) | 37.0 (29.7, 44.1) | 36.6 (29.6, 43.8) | 3.0 (2.2, 4.0)                     | 0.0 (0.0, 0.0) | -0.9 (-4.7, 2.2)    | 1.6 (-0.1, 3.8)     |
| Timor-Leste     | 46.5 (37.4, 55.9)       | 46.8 (37.6, 56.3) | 47.4 (38.4, 56.5) | 46.8 (37.9, 56.0) | 3.5 (2.4, 4.9)                     | 0.0 (0.0, 0.0) | -4.4 (-9.7, -0.3)   | -1.5 (-3.2, 0.7)    |
| Tanzania        | 38.6 (30.6, 46.6)       | 38.6 (30.7, 46.7) | 39.0 (31.5, 46.7) | 38.6 (31.3, 46.2) | 3.1 (2.2, 4.2)                     | 0.0 (0.0, 0.0) | -1.9 (-6.0, 1.7)    | 0.5 (-1.4, 2.3)     |
| Uganda          | 51.1 (40.5, 61.5)       | 51.2 (40.6, 61.6) | 51.7 (41.6, 61.7) | 51.2 (41.4, 61.2) | 0.5 (0.3, 0.7)                     | 0.0 (0.0, 0.0) | -2.1 (-7.6, 2.5)    | -1.6 (-2.7, -0.4)   |
| Yemen           | 22.4 (17.2, 27.7)       | 22.7 (17.6, 28.1) | 23.5 (18.7, 28.4) | 22.7 (18.4, 27.2) | 1.5 (1.2, 1.9)                     | 0.0 (0.0, 0.0) | -2.8 (-4.7, -1.2)   | -7.0 (-8.1, -5.6)   |
| Zambia          | 46.0 (36.8, 55.4)       | 46.1 (36.9, 55.5) | 46.8 (38.0, 55.9) | 46.1 (37.3, 55.2) | 3.3 (2.2, 4.6)                     | 0.0 (0.0, 0.0) | -3.6 (-9.1, 0.7)    | -0.3 (-1.7, 1.3)    |
| Zimbabwe        | 30.9 (24.3, 37.6)       | 30.5 (23.9, 37.1) | 31.5 (25.1, 37.9) | 30.5 (24.6, 36.4) | -1.5 (-1.9, -1.1)                  | 0.0 (0.0, 0.0) | -3.0 (-5.4, -1.0)   | -9.8 (-10.7, -9.0)  |



**Table S5.6.** Change in the distribution of diarrhea deaths by wealth quintile for four scenarios, compared to when no treatment is available (Scenario 1).

| Country         | Total cases averted (%) |                   |                   |                   | Change in AUC (compared to S1) (%) |                |                      |                      |
|-----------------|-------------------------|-------------------|-------------------|-------------------|------------------------------------|----------------|----------------------|----------------------|
|                 | S2                      | S3                | S4                | S5                | S2 AUC                             | S3 AUC         | S4 AUC               | S5 AUC               |
| Armenia         | 29.0 (23.1, 34.4)       | 30.9 (24.8, 36.4) | 35.2 (29.7, 39.8) | 30.9 (27.8, 33.3) | 4.6 (3.9, 5.3)                     | 0.0 (0.0, 0.0) | -6.7 (-8.6, -4.7)    | -9.5 (-12, -6.5)     |
| Burundi         | 53.3 (47.5, 57.8)       | 53.2 (47.5, 57.8) | 53.6 (48.3, 57.8) | 53.2 (47.9, 57.3) | 0.6 (0.4, 0.7)                     | 0.0 (0.0, 0.0) | -3.9 (-7.2, -0.6)    | -2.8 (-4.2, -1.5)    |
| Benin           | 33.3 (28.9, 36.9)       | 34.1 (29.6, 37.7) | 35.2 (31.3, 38.4) | 34.1 (30.6, 36.7) | 3.3 (2.8, 3.7)                     | 0.0 (0.0, 0.0) | -4.5 (-5.8, -3.2)    | -5.7 (-6.4, -5.1)    |
| Burkina Faso    | 42.8 (38.2, 46.2)       | 43.7 (39.0, 47.3) | 44.5 (40.0, 48.0) | 43.7 (39.2, 47.0) | 6.6 (5.5, 7.5)                     | 0.0 (0.0, 0.0) | -4.9 (-6.6, -3.1)    | -0.1 (-1.6, 1.1)     |
| Bangladesh      | 23.2 (20.5, 25.5)       | 24.5 (21.5, 27.0) | 25.1 (22.2, 27.4) | 24.5 (22.0, 26.4) | 5.2 (4.5, 5.8)                     | 0.0 (0.0, 0.0) | -2.4 (-3.2, -1.7)    | -1.9 (-3.1, -0.9)    |
| Cote d'Ivoire   | 24.9 (20.8, 28.4)       | 25.2 (21.3, 28.7) | 25.6 (22.3, 28.4) | 25.2 (22.7, 27.2) | 1.8 (1.6, 2.0)                     | 0.0 (0.0, 0.0) | -2.2 (-3.2, -1.2)    | -4.8 (-6.9, -3.3)    |
| Cameroon        | 21.4 (14.1, 28.3)       | 23.9 (16.9, 30.7) | 27.0 (21.8, 32.0) | 23.9 (21.5, 25.8) | 4.2 (3.6, 4.8)                     | 0.0 (0.0, 0.0) | -5.4 (-7.1, -3.8)    | -11.9 (-15.9, -8.1)  |
| DRC             | 36.5 (31.5, 40.7)       | 35.9 (31.1, 40.0) | 37.3 (32.9, 40.9) | 35.9 (32.3, 38.7) | -1.1 (-1.4, -0.9)                  | 0.0 (0.0, 0.0) | -4.6 (-5.9, -3.2)    | -11.0 (-12.8, -9.2)  |
| Congo           | 33.0 (28.2, 37.1)       | 34.1 (29.1, 38.3) | 35.1 (31.1, 38.6) | 34.1 (30.6, 36.7) | 4.0 (3.3, 4.5)                     | 0.0 (0.0, 0.0) | -4.6 (-6.2, -2.9)    | -4.4 (-7.0, -2.2)    |
| Comoros         | 36.7 (31.8, 40.5)       | 36.5 (31.7, 40.3) | 37.2 (33.1, 40.5) | 36.5 (32.8, 39.3) | -0.3 (-0.4, -0.2)                  | 0.0 (0.0, 0.0) | -4.3 (-6.0, -2.4)    | -7.7 (-9.7, -5.6)    |
| Ethiopia        | 29.4 (25.0, 33.6)       | 30.9 (26.2, 35.4) | 32.0 (27.8, 35.5) | 30.9 (27.9, 33.4) | 6.3 (5.3, 7.3)                     | 0.0 (0.0, 0.0) | -3.8 (-5.0, -2.5)    | -1.7 (-4.2, 0.0)     |
| Ghana           | 41.4 (35.9, 46.2)       | 40.9 (35.3, 45.7) | 41.3 (37.0, 44.7) | 40.9 (36.8, 44.0) | -3.1 (-3.5, -2.5)                  | 0.0 (0.0, 0.0) | -2.7 (-5.4, -0.3)    | -6.3 (-9.1, -3.9)    |
| Guinea          | 33.6 (28.7, 37.7)       | 35.5 (30.5, 39.9) | 37.4 (32.9, 41.1) | 35.5 (32.0, 38.3) | 6.1 (5.1, 7.0)                     | 0.0 (0.0, 0.0) | -5.8 (-7.4, -4.0)    | -4.1 (-6.5, -1.8)    |
| Gambia          | 62.1 (55.5, 67.0)       | 62.1 (55.6, 67.0) | 62.8 (56.6, 67.8) | 62.1 (55.8, 66.9) | -1.3 (-1.6, -1.0)                  | 0.0 (0.0, 0.0) | 1.5 (-2.3, 4.8)      | -0.5 (-1.2, 0.4)     |
| Honduras        | 47.8 (41.8, 52.5)       | 47.9 (41.8, 52.6) | 48.0 (43.2, 51.7) | 47.9 (43.1, 51.6) | 0.1 (0.1, 0.2)                     | 0.0 (0.0, 0.0) | 0.5 (-3.5, 3.8)      | 0.6 (-3.2, 3.4)      |
| Haiti           | 31.6 (26.6, 35.9)       | 32.6 (27.4, 37.2) | 33.5 (29.2, 37.2) | 32.6 (29.3, 35.1) | 4.9 (4.1, 5.6)                     | 0.0 (0.0, 0.0) | -2.5 (-3.9, -1.1)    | -0.9 (-3.5, 1.1)     |
| Indonesia       | 59.3 (53.0, 64.2)       | 59.4 (53.0, 64.2) | 60.7 (54.7, 65.4) | 59.4 (53.4, 64.0) | -0.4 (-0.5, -0.3)                  | 0.0 (0.0, 0.0) | -8.5 (-12.7, -4.5)   | -6.1 (-7.7, -4.7)    |
| Kenya           | 53.0 (47.3, 57.4)       | 52.7 (47.0, 57.1) | 54.8 (49.3, 59.4) | 52.7 (47.4, 56.7) | -2.0 (-2.4, -1.6)                  | 0.0 (0.0, 0.0) | -11.2 (-15.0, -7.7)  | -11.3 (-12.8, -10.3) |
| Kyrgyz Republic | 46.5 (40.6, 51.5)       | 47.3 (41.4, 52.1) | 47.5 (42.7, 51.2) | 47.3 (42.5, 50.9) | 9.1 (7.4, 10.5)                    | 0.0 (0.0, 0.0) | -2.9 (-5.3, -0.6)    | 6.5 (4.1, 8.6)       |
| Cambodia        | 50.6 (44.2, 55.7)       | 50.5 (44.2, 55.4) | 50.8 (45.9, 54.9) | 50.5 (45.4, 54.4) | -5.2 (-6.2, -4.1)                  | 0.0 (0.0, 0.0) | -2.8 (-6.9, 1.3)     | -7.7 (-10.5, -4.7)   |
| Liberia         | 43.6 (38.4, 47.7)       | 43.7 (38.5, 47.7) | 44.0 (39.5, 47.4) | 43.7 (39.2, 47.0) | 1.3 (1.1, 1.5)                     | 0.0 (0.0, 0.0) | -3.4 (-5.6, -0.9)    | -3.2 (-5.1, -1.3)    |
| Lesotho         | 47.5 (41.3, 52.6)       | 46.7 (40.5, 52.0) | 49.5 (44.2, 54.3) | 46.7 (42.0, 50.3) | -2.7 (-3.1, -2.2)                  | 0.0 (0.0, 0.0) | -11.0 (-15.7, -7.0)  | -13.5 (-17, -10.7)   |
| Mali            | 27.7 (23.8, 31.0)       | 29.0 (24.9, 32.4) | 30.1 (26.5, 33.1) | 29.0 (26.1, 31.2) | 4.5 (3.9, 5.0)                     | 0.0 (0.0, 0.0) | -3.6 (-4.5, -2.6)    | -4.6 (-6.1, -3.2)    |
| Mozambique      | 50.7 (44.9, 55.3)       | 52.1 (46.3, 56.8) | 56.2 (50.3, 61.4) | 52.1 (46.9, 56.1) | 5.0 (4.1, 5.9)                     | 0.0 (0.0, 0.0) | -15.5 (-20.3, -11.1) | -8.1 (-10.1, -6.1)   |
| Malawi          | 57.4 (50.6, 62.6)       | 57.1 (50.3, 62.3) | 61.1 (54.7, 66.7) | 57.1 (51.4, 61.5) | -1.4 (-1.7, -1.0)                  | 0.0 (0.0, 0.0) | -17.8 (-24.1, -12.3) | -14.3 (-16.9, -11.5) |
| Niger           | 47.4 (42.1, 51.4)       | 48.0 (42.7, 52.0) | 49.4 (44.4, 53.4) | 48.0 (43.1, 51.7) | 3.6 (3.0, 4.2)                     | 0.0 (0.0, 0.0) | -7.3 (-9.6, -4.9)    | -4.6 (-5.3, -3.9)    |
| Nigeria         | 27.5 (24.6, 30.0)       | 28.5 (25.5, 31.1) | 29.3 (26.3, 31.8) | 28.5 (25.8, 30.8) | 4.4 (3.9, 4.9)                     | 0.0 (0.0, 0.0) | -3.2 (-4.1, -2.3)    | -4.1 (-4.9, -3.1)    |
| Nepal           | 35.2 (29.9, 40.0)       | 35.3 (30.0, 40.1) | 35.8 (31.4, 39.3) | 35.3 (31.7, 38.0) | 1.7 (1.4, 1.9)                     | 0.0 (0.0, 0.0) | -2.7 (-4.2, -1.1)    | -4.1 (-6.4, -1.8)    |
| Pakistan        | 56.0 (50.0, 60.8)       | 57.6 (51.6, 62.5) | 60.5 (54.6, 65.4) | 57.6 (52.1, 62.1) | 8.3 (6.6, 10.0)                    | 0.0 (0.0, 0.0) | -16.3 (-21.1, -12.0) | -1.7 (-4.0, 0.6)     |
| Rwanda          | 46.9 (41.7, 51.1)       | 47.6 (42.2, 51.9) | 48.9 (44.0, 52.8) | 47.6 (42.8, 51.3) | 5.8 (4.8, 6.7)                     | 0.0 (0.0, 0.0) | -5.1 (-7.7, -2.3)    | 0.3 (-1.6, 2.0)      |
| Senegal         | 30.3 (25.8, 34.5)       | 30.5 (25.9, 34.7) | 30.6 (26.9, 33.7) | 30.5 (27.4, 32.8) | 1.0 (0.8, 1.2)                     | 0.0 (0.0, 0.0) | -1.2 (-2.7, 0.2)     | -1.8 (-4.2, 0.4)     |
| Sierra Leone    | 60.2 (53.8, 65.0)       | 60.5 (54.1, 65.3) | 60.9 (54.9, 65.7) | 60.5 (54.4, 65.1) | 3.7 (2.9, 4.5)                     | 0.0 (0.0, 0.0) | -4.9 (-8.5, -1.4)    | 0.2 (-1.1, 1.3)      |
| Chad            | 23.9 (20.8, 26.5)       | 24.1 (20.9, 26.8) | 24.3 (21.5, 26.7) | 24.1 (21.7, 26.0) | 4.3 (3.7, 4.8)                     | 0.0 (0.0, 0.0) | -0.2 (-0.9, 0.4)     | 3.5 (2.3, 4.4)       |
| Togo            | 27.3 (22.9, 31.0)       | 28.4 (23.9, 32.3) | 30.3 (26.2, 34.0) | 28.4 (25.5, 30.6) | 0.8 (0.5, 0.9)                     | 0.0 (0.0, 0.0) | -3.8 (-4.6, -2.8)    | -10.4 (-11.9, -9.2)  |
| Tajikistan      | 49.8 (44.3, 54.2)       | 50.0 (44.5, 54.3) | 50.5 (45.5, 54.4) | 50.0 (44.9, 53.8) | 3.5 (2.8, 4.1)                     | 0.0 (0.0, 0.0) | -1.0 (-4.1, 2.1)     | 2.3 (0.6, 4.3)       |
| Timor-Leste     | 66.1 (59.3, 71.3)       | 66.3 (59.5, 71.5) | 67.1 (60.4, 72.4) | 66.3 (59.6, 71.4) | 4.6 (3.4, 5.7)                     | 0.0 (0.0, 0.0) | -9.8 (-14.7, -4.8)   | -0.5 (-2.2, 1.3)     |
| Tanzania        | 49.1 (43.5, 53.5)       | 49.2 (43.5, 53.6) | 49.6 (44.7, 53.6) | 49.2 (44.2, 53.0) | 2.9 (2.4, 3.4)                     | 0.0 (0.0, 0.0) | -3.5 (-7.2, -0.1)    | -0.4 (-3.0, 1.8)     |
| Uganda          | 66.7 (59.5, 72.3)       | 66.5 (59.3, 72.0) | 67.2 (60.4, 73.1) | 66.5 (59.8, 71.6) | -2.6 (-3.4, -1.9)                  | 0.0 (0.0, 0.0) | -7.9 (-13.3, -2.9)   | -7.4 (-9.3, -5.6)    |
| Yemen           | 30.5 (26.6, 33.7)       | 30.9 (27.0, 34.1) | 31.9 (28.4, 34.6) | 30.9 (27.8, 33.3) | 2.3 (2.0, 2.6)                     | 0.0 (0.0, 0.0) | -4.1 (-5.6, -2.8)    | -6.2 (-7.5, -4.9)    |
| Zambia          | 60.2 (53.8, 65.0)       | 60.2 (53.8, 65.0) | 60.9 (54.9, 65.8) | 60.2 (54.1, 64.9) | 0.0 (-0.2, 0.1)                    | 0.0 (0.0, 0.0) | -7.3 (-11.6, -3.0)   | -4.8 (-6.0, -3.8)    |
| Zimbabwe        | 32.8 (28.6, 36.3)       | 33.0 (28.8, 36.5) | 34.6 (30.7, 37.8) | 33.0 (29.6, 35.5) | 0.4 (0.3, 0.5)                     | 0.0 (0.0, 0.0) | -4.5 (-5.8, -3.3)    | -9.7 (-11.1, -8.6)   |

## VI. Sensitivity analyses

We performed two sets of sensitivity analyses.

### 1. Sensitivity analysis 1. Accounting for differences in the sizes of the under-five population in each quintile applying a total fertility rate adjustment

First, we accounted for the differences in the sizes of the under-five population in each quintile by adjusting the number of cases and deaths with the quintile-specific total fertility rate (TFR):

$$C_i = [Ac_i \times TC_a + UAc_i \times TC_{ua}] \times \frac{TFR_i}{TFR_{avg}} ,$$

$$D_i = [Ad_i \times TD_a + UAd_i \times TD_{ua}] \times \frac{TFR_i}{TFR_{avg}} .$$

where  $TFR_i$  and  $TFR_{avg}$  are the quintile-specific and national average of TFR, respectively.

Higher TFR in lower wealth quintiles leads to greater number of susceptible children and therefore larger proportions of cases and deaths in these quintiles. We present the full results of the sensitivity analysis for cases and deaths in Tables S6.1 and S6.2, respectively. We highlighted the results with significant differences in the change in the AUC of greater than 25% compared to the main results (presented in Appendix V).

We found that the results were mostly sensitive to this adjustment, mainly because the TFR adjustment makes the underlying distribution of cases and deaths more unequal (more cases and deaths occur in the lower wealth quintiles), and therefore increases the effect of the vaccine/treatment scenarios on the distribution. As expected, the changes in the AUC for all scenarios are more favorable (more equal distribution of cases and deaths) than the main results. We therefore conclude that our main results (presented in the main text and Appendix V) that did not reflect the TFR adjustment are conservative estimates of the effect of vaccines and treatment on the distributions of disease cases and deaths.

### 2. Sensitivity analysis 2. Replacing the flat distribution of the unattributable cases and deaths with a distribution comparable to the distribution of quintile-specific under-five mortality rates.

Instead of assuming that unattributable cases and deaths ( $UAc_i$  and  $UAd_i$ ) follow a flat distribution, we replaced it with the ratios of under-five mortality rates from each quintile ( $U5M_i$ ) to check the impact of this assumption on our results:

$$UAc_i = UAd_i = \frac{U5M_i}{\sum_{j=1}^5 U5M_j} .$$

In all countries, U5M in the lower wealth quintiles are greater than in the higher wealth quintiles, therefore replacing the flat distribution with U5M would lead to greater differences in the distribution of cases and deaths across quintiles. On average, the proportion of unattributable cases/deaths are 27%/28% for measles, 10%/7% for pneumonia, and 5%/4% for diarrhea. The impact of this replacement should be greater on countries with higher proportion of unattributable cases/deaths.

In Tables S6.3 and S6.4 we highlight the results with significant differences in the change in AUC of greater than 25% for cases and deaths, respectively, compared to the main results (presented in Appendix V). We found that the results were mostly not sensitive to this adjustment. The results that had larger differences compared to the main results were for Scenario 5 of PCV and RV. This scenario assumes equal baseline mortality risk with current quintile-specific treatment coverage rates. In this sensitivity analysis, the change in the AUC were more favorable (more equal distribution of cases across quintiles) than the main results because countries started with more unequal case distributions, and therefore the lower quintiles benefited more when baseline mortality risk was equalized.

**Table S6.1.** Sensitivity analysis – change in the area under the curve (AUC) for cases, compared to Scenario 1, with total fertility rate adjustment. Highlighted cells represent greater than 25% difference compared to the main results in Appendix V.

Scenarios:

- S2: current quintile-specific vaccine coverage rates;
- S3: national average of vaccine coverage for all quintiles;
- S4: vaccine coverage proportional to quintile-specific baseline mortality risks;
- S5: equal baseline morbidity risk with current quintile-specific vaccine coverage rates.

| Country       | MCV S2            | MCV S3            | MCV S4               | MCV S5               | PCV S2            | PCV S3            | PCV S4            | PCV S5               | RV S2             | RV S3              | RV S4             | RV S5                |
|---------------|-------------------|-------------------|----------------------|----------------------|-------------------|-------------------|-------------------|----------------------|-------------------|--------------------|-------------------|----------------------|
| Armenia       | -3.6 (-3.9, -3.2) | 16.1 (14.4, 18.1) | -15.2 (-17.7, -12.6) | -14.1 (-15.1, -12.8) | -1.8 (-2.2, -1.3) | -1.6 (-2, -1)     | -2.2 (-3.2, -1.1) | -15 (-17.9, -11.4)   | -2.3 (-2.5, -1.9) | -1.3 (-2.3, -0.1)  | -3.2 (-6.6, -0.1) | -19 (-20, -17.5)     |
| Burundi       | 3.5 (3, 4)        | 13.4 (12, 15)     | -15 (-18.1, -11.8)   | -3.7 (-5.2, -2)      | 0.4 (0.2, 0.6)    | 0.4 (0.2, 0.6)    | 0.4 (-0.8, 1.5)   | -2.3 (-4.2, -0.6)    | 0.1 (0, 0.1)      | 0.6 (0.1, 1.3)     | -0.4 (-4, 2.7)    | -4.6 (-6.3, -3.1)    |
| Benin         | 6.7 (6.2, 7.1)    | 4.7 (4.4, 5.1)    | -9.3 (-10.4, -8.3)   | -5.4 (-6, -4.8)      | -1.6 (-1.9, -1.3) | -1.6 (-1.9, -1.4) | -2.2 (-3, -1.5)   | -14.8 (-15.4, -14.2) | NA                | NA                 | NA                | NA                   |
| Burkina Faso  | 5.6 (4.8, 6.5)    | 9 (7.9, 10.1)     | -16.2 (-18.5, -14)   | -7.1 (-8.4, -5.9)    | -1.4 (-1.7, -1.1) | -1.3 (-1.6, -0.9) | -1.6 (-2.5, -0.7) | -13.3 (-14.1, -12.3) | -2.8 (-3.3, -2.4) | -2.4 (-3.1, -1.7)  | -3.7 (-6.6, -1.2) | -16.5 (-17.3, -15.9) |
| Bangladesh    | 5.6 (4.6, 6.6)    | 11.7 (10.3, 13.3) | -19.6 (-22.4, -17)   | -9.1 (-10.8, -7.5)   | -1.6 (-1.7, -1.5) | -1.4 (-1.6, -1.2) | -1.9 (-2.8, -1)   | -14.6 (-15.1, -14.3) | NA                | NA                 | NA                | NA                   |
| Cote d'Ivoire | 2.7 (1.5, 3.8)    | 3.2 (2, 4.2)      | -12.1 (-14.5, -10)   | -12.1 (-14, -10.5)   | -0.4 (-1, 0)      | -0.7 (-1.2, -0.3) | -0.9 (-1.7, 0)    | -13.7 (-15.3, -12.7) | -3.2 (-4.1, -2.5) | -3.1 (-3.9, -2.3)  | -4.1 (-5.9, -2.5) | -20.3 (-21.9, -18.9) |
| Cameroon      | 5.2 (3.4, 7.1)    | 7.8 (5.8, 10)     | -24.6 (-26.9, -22.2) | -11.9 (-14.5, -9)    | -5 (-7.7, -2.6)   | -5.3 (-7.9, -3)   | -5.8 (-8.5, -3.3) | -24.6 (-29.9, -19.6) | -9.3 (-10.3, -8)  | -8.9 (-10.1, -7.3) | -10.9 (-13, -8.8) | -33.2 (-34.7, -31.2) |
| DRC           | 3.3 (2.8, 3.9)    | 6.9 (6.1, 7.6)    | -22.9 (-25.4, -20.6) | -9.5 (-10.6, -8.5)   | -1.7 (-2.7, -0.7) | -1.8 (-2.8, -0.8) | -2.3 (-3.5, -1.1) | -13.8 (-16.5, -11.3) | NA                | NA                 | NA                | NA                   |
| Congo         | 7.9 (6.4, 9.4)    | 7.7 (6.1, 9.2)    | -21.6 (-24.6, -18.5) | -7.8 (-10, -5.6)     | -0.8 (-1.8, 0.1)  | -1.1 (-2, -0.3)   | -1.4 (-2.7, -0.1) | -14.4 (-16.7, -12.2) | -4.3 (-5.3, -3.1) | -4 (-5.2, -2.7)    | -5.8 (-8.7, -3.4) | -23.1 (-25.1, -21.1) |
| Comoros       | 5.4 (4.4, 6.5)    | 8.4 (7.1, 9.8)    | -21 (-23.2, -18.8)   | -13 (-14.6, -11.4)   | NA                | NA                | NA                | NA                   | NA                | NA                 | NA                | NA                   |
| Ethiopia      | 3.8 (3.2, 4.4)    | 5.1 (4.5, 5.8)    | -14.5 (-15.9, -13)   | -6.6 (-7.6, -5.6)    | -1.4 (-3.4, 0.6)  | -1.6 (-3.5, 0.3)  | -2.1 (-4.2, 0)    | -16 (-19.8, -12)     | -3.6 (-4.3, -2.8) | -3.4 (-4.3, -2.4)  | -5.3 (-7.8, -3.1) | -20.2 (-21.4, -18.8) |
| Ghana         | -0.8 (-1.8, 0)    | 8.2 (6.6, 9.9)    | -15.2 (-18.8, -11.4) | -18.6 (-20.4, -17.1) | -0.3 (-2.6, 1.4)  | -0.4 (-2.7, 1.3)  | -0.4 (-3, 1.7)    | -14.9 (-19.8, -11)   | -3.7 (-4.6, -2.8) | -3.1 (-4.1, -1.9)  | -4.2 (-7.5, -1.4) | -21.9 (-23.6, -20.1) |
| Guinea        | 1 (0.5, 1.5)      | 1.6 (1, 2.2)      | -10 (-11, -9)        | -13.7 (-14.5, -12.6) | NA                | NA                | NA                | NA                   | NA                | NA                 | NA                | NA                   |
| Gambia        | -9 (-10.1, -8)    | 0.7 (0.2, 1.1)    | -8.5 (-13, -4.6)     | -22.4 (-24.1, -20.8) | -0.5 (-0.8, -0.1) | -0.5 (-0.8, -0.1) | -0.3 (-1.2, 0.6)  | -8.5 (-9.5, -7.4)    | -0.5 (-0.7, -0.3) | -0.6 (-0.8, -0.3)  | -0.5 (-3, 2)      | -8.8 (-9.2, -8.3)    |
| Honduras      | -3.5 (-4, -3.1)   | 6.7 (5.7, 7.7)    | -11.9 (-14.5, -9.3)  | -18.8 (-19.9, -17.9) | 3 (0.8, 4.1)      | 2.7 (0.6, 3.9)    | 3.3 (1, 4.9)      | -6.5 (-11.9, -3.6)   | -2 (-2.7, -1.3)   | -1.5 (-2.4, -0.7)  | -2.5 (-6, 0.4)    | -18.2 (-19.7, -16.7) |
| Haiti         | -2.4 (-2.8, -2.1) | -0.5 (-1, -0.2)   | -4 (-5, -3.2)        | -20.2 (-21, -19.6)   | -0.9 (-1.9, 0)    | -0.9 (-2, -0.1)   | -0.9 (-2, 0)      | -16.7 (-18.2, -15.5) | -5.5 (-6.3, -4.7) | -5.4 (-6.2, -4.6)  | -6.4 (-8.7, -4)   | -24.9 (-26.5, -23.5) |
| Indonesia     | 2.3 (2, 2.7)      | 10.3 (9.4, 11.2)  | -15.6 (-18, -13.4)   | -10.4 (-11.3, -9.5)  | NA                | NA                | NA                | NA                   | NA                | NA                 | NA                | NA                   |
| Kenya         | 1.4 (0.3, 2.2)    | 6.9 (5.5, 8.1)    | -20.9 (-23.2, -18.6) | -18 (-19.6, -16.6)   | -3.8 (-4.8, -3.1) | -3.6 (-4.6, -2.9) | -4.2 (-5.4, -3.1) | -22.5 (-24.3, -21.1) | -5.8 (-7.1, -5)   | -5 (-6.5, -3.6)    | -6.8 (-9.8, -4.3) | -26.3 (-28.6, -24.7) |

|                 |                   |                   |                      |                      |                   |                   |                   |                      |                   |                   |                   |                      |
|-----------------|-------------------|-------------------|----------------------|----------------------|-------------------|-------------------|-------------------|----------------------|-------------------|-------------------|-------------------|----------------------|
| Kyrgyz Republic | -4.4 (-5.1, -3.8) | 6.4 (5.6, 7.4)    | -3.3 (-6.5, -0.3)    | -11.1 (-12.2, -10.1) | -0.6 (-1, -0.1)   | -0.4 (-0.7, 0.1)  | -0.4 (-1.2, 0.4)  | -6.8 (-8.3, -5.3)    | NA                | NA                | NA                | NA                   |
| Cambodia        | 11.3 (9.9, 12.8)  | 10.7 (9.4, 12)    | -16.4 (-19.2, -13.7) | -2.2 (-4, -0.3)      | 0.2 (-1, 1.5)     | -0.1 (-1.3, 1.2)  | -0.1 (-1.6, 1.7)  | -9.1 (-13.4, -4.3)   | NA                | NA                | NA                | NA                   |
| Liberia         | -0.9 (-1.2, -0.5) | 1.1 (0.6, 1.5)    | -9.4 (-10.3, -8.5)   | -17.7 (-18.4, -17.1) | -0.6 (-2.2, 0.9)  | -0.7 (-2.4, 0.8)  | -0.9 (-2.8, 0.9)  | -15.4 (-18.7, -12.3) | -3.1 (-3.4, -2.7) | -2.9 (-3.3, -2.5) | -3.6 (-5, -2.4)   | -20.3 (-21, -19.5)   |
| Lesotho         | -1.4 (-2.8, -0.2) | 8.2 (6, 10.3)     | -18.7 (-21.9, -15.7) | -20.7 (-23.3, -18.6) | -2.4 (-4.4, -0.8) | -2.2 (-4.2, -0.6) | -2.6 (-4.8, -0.7) | -19.3 (-23.6, -15.8) | NA                | NA                | NA                | NA                   |
| Mali            | 6.1 (5.4, 6.8)    | 11.2 (10.2, 12.3) | -22.5 (-24.7, -20.4) | -4.9 (-6.1, -3.8)    | -1.1 (-1.6, -0.5) | -1.2 (-1.7, -0.6) | -1.8 (-2.7, -0.9) | -12.7 (-14.6, -10.5) | -1.8 (-2.3, -1.2) | -1.3 (-2.2, -0.1) | -3.4 (-5.8, -1.4) | -16 (-16.7, -15.1)   |
| Mozambique      | 2 (1.4, 2.6)      | 8.3 (7.4, 9.3)    | -24.1 (-26.1, -22.2) | -13.1 (-14.2, -12)   | -4.3 (-5.1, -3.6) | -4.1 (-5, -3.3)   | -4.9 (-6, -3.9)   | -22.5 (-25, -20.1)   | -5.3 (-5.6, -4.8) | -4.4 (-5.5, -3.2) | -6.8 (-9.2, -4.6) | -25.3 (-26.1, -24.4) |
| Malawi          | -1.1 (-1.8, -0.2) | 9.7 (8, 11.5)     | -20.3 (-23, -17.4)   | -16.3 (-18.1, -14)   | -3.9 (-5.5, -2.3) | -3.6 (-5.3, -2)   | -4.2 (-6, -2.3)   | -21.1 (-25.1, -16.9) | -5.3 (-6, -4.5)   | -4.5 (-5.5, -3.2) | -6.2 (-8.9, -3.8) | -24.4 (-26.3, -22.1) |
| Niger           | 7 (6.5, 7.6)      | 10.1 (9.4, 10.9)  | -12.7 (-14.2, -11.3) | 0 (-0.8, 0.7)        | -0.1 (-0.3, 0.2)  | -0.2 (-0.4, 0)    | -0.8 (-1.6, -0.1) | -8.2 (-8.9, -7.3)    | 0.3 (-0.5, 1.2)   | 0.4 (-0.4, 1.5)   | -1.6 (-4.7, 1)    | -9.1 (-9.9, -8.1)    |
| Nigeria         | 10 (8.8, 10.9)    | 1.1 (0.4, 1.7)    | -10.6 (-12, -9.6)    | -1.8 (-3.7, -0.4)    | -2 (-2.7, -1.1)   | -2.8 (-3.2, -2.3) | -3.3 (-4, -2.6)   | -17.3 (-18.7, -16)   | NA                | NA                | NA                | NA                   |
| Nepal           | -1.7 (-3.5, -0.1) | 3.5 (1.3, 5.4)    | -18.8 (-22.8, -15.1) | -18.7 (-21.7, -16.1) | 0.1 (-1.9, 2)     | 0 (-2.1, 1.9)     | 0.1 (-2.2, 2.2)   | -15 (-18.9, -11.5)   | NA                | NA                | NA                | NA                   |
| Pakistan        | 6.1 (5.1, 7.2)    | 4.5 (3.6, 5.5)    | -20 (-22.5, -17.6)   | -11.3 (-12.9, -9.7)  | -3 (-3.9, -2.2)   | -3.3 (-4.2, -2.6) | -4.1 (-5.3, -3.1) | -20.5 (-22.6, -18.7) | -1.4 (-3.4, 0.6)  | -1.6 (-3.5, 0.3)  | -2.1 (-4.2, 0)    | -16 (-19.8, -12)     |
| Rwanda          | 1.5 (0.9, 2.1)    | 10.4 (9, 12)      | -14 (-17.1, -11)     | -10.7 (-11.8, -9.6)  | -0.2 (-0.8, 0.3)  | -0.1 (-0.8, 0.3)  | -0.2 (-1.4, 1)    | -9.7 (-11.7, -8.1)   | -1.7 (-2.1, -1.4) | -1 (-1.7, 0.1)    | -2.3 (-5.8, 0.6)  | -14.7 (-15.9, -13.7) |
| Senegal         | -0.2 (-0.8, 0.5)  | 8.8 (7.6, 10)     | -17.1 (-19.8, -13.4) | -14 (-15.7, -12.3)   | -0.9 (-2, -0.1)   | -0.8 (-1.9, -0.1) | -1.1 (-2.5, 0.1)  | -12 (-15.3, -9.6)    | -1.3 (-2, -0.3)   | -0.8 (-1.7, 0.3)  | -2 (-5.1, 0.9)    | -13.6 (-15.8, -10.9) |
| Sierra Leone    | -2.9 (-3.3, -2.6) | 3.2 (2.5, 3.8)    | -7.7 (-9.7, -5.9)    | -15.3 (-16.2, -14.6) | -0.5 (-1.1, 0.1)  | -0.5 (-1.1, 0.2)  | -0.5 (-1.4, 0.5)  | -11.4 (-12.6, -10.2) | -1.9 (-2.1, -1.6) | -1.5 (-1.9, -1)   | -2.3 (-4.8, -0.1) | -14.8 (-15.6, -14.1) |
| Chad            | 2.1 (1.9, 2.3)    | -0.2 (-0.3, 0)    | -0.5 (-1.2, 0)       | -2.4 (-3, -1.9)      | NA                | NA                | NA                | NA                   | NA                | NA                | NA                | NA                   |
| Togo            | -1 (-1.6, -0.4)   | 3.9 (3, 4.7)      | -19.1 (-22, -16.4)   | -13.8 (-14.9, -12.8) | -2.6 (-3, -2.3)   | -2.5 (-2.9, -2.2) | -2.9 (-3.7, -2.1) | -17.3 (-18.3, -16.4) | -5.6 (-6.2, -5.2) | -5.1 (-5.9, -4.2) | -6.5 (-8.9, -4.1) | -24.3 (-25.4, -23.3) |
| Tajikistan      | 1.1 (0.9, 1.3)    | 7.5 (6.6, 8.5)    | -4 (-7, -0.8)        | -6.2 (-6.9, -5.5)    | NA                | NA                | NA                | NA                   | -0.3 (-0.5, -0.1) | 0.2 (-0.2, 0.7)   | -0.4 (-4.1, 2.8)  | -7.4 (-8.3, -6.3)    |
| Timor-Leste     | 7.9 (7.2, 8.5)    | 6.3 (5.7, 6.9)    | -11.3 (-12.7, -9.8)  | -4.9 (-5.8, -4)      | NA                | NA                | NA                | NA                   | NA                | NA                | NA                | NA                   |
| Tanzania        | 1.3 (0.5, 2)      | 9.3 (7.9, 10.8)   | -13.6 (-16.2, -11)   | -13.8 (-14.9, -12.7) | 0.6 (-0.6, 1.4)   | 0.5 (-0.7, 1.3)   | 0.5 (-0.9, 1.8)   | -12.1 (-15.4, -9.7)  | -2.1 (-2.6, -1.7) | -1.6 (-2.4, -0.7) | -2.8 (-6, -0.2)   | -18.4 (-19.3, -17.6) |
| Uganda          | 0.6 (0.1, 1.1)    | 3.8 (3.2, 4.5)    | -8.5 (-11.4, -5.9)   | -10.2 (-11.2, -9.1)  | -0.4 (-1.2, 0.4)  | -0.3 (-1.2, 0.5)  | -0.3 (-1.4, 0.8)  | -10.3 (-12, -8.7)    | -2.7 (-3.1, -2.4) | -2.6 (-2.9, -2.3) | -2.8 (-3.4, -2.2) | -16.2 (-17.3, -15.5) |
| Yemen           | 3.1 (2.2, 4)      | 7.4 (6.2, 8.6)    | -22.8 (-24.6, -21)   | -13.8 (-15.1, -12.5) | -2.8 (-3.7, -1.8) | -2.9 (-3.8, -1.9) | -3.5 (-4.7, -2.3) | -19.9 (-22, -17.6)   | -3.8 (-4.5, -3)   | -3.4 (-4.4, -2.3) | -5.3 (-8.5, -2.9) | -22.5 (-23.4, -21.4) |
| Zambia          | 2.5 (1.7, 3.2)    | 6.6 (5.5, 7.6)    | -13.4 (-15.6, -11.4) | -13 (-14.1, -12)     | -0.4 (-1.1, 0.2)  | -0.5 (-1.1, 0.2)  | -0.7 (-1.7, 0.3)  | -16 (-17.5, -14.5)   | -2.2 (-2.6, -1.8) | -1.8 (-2.5, -1)   | -2.9 (-6, -0.5)   | -19.4 (-20.2, -18.8) |
| Zimbabwe        | 2.1 (1.5, 2.6)    | 6.9 (6, 7.9)      | -15.3 (-17.8, -13)   | -10.6 (-11.5, -9.7)  | -3.1 (-3.5, -2.8) | -3.1 (-3.5, -2.8) | -3.5 (-4.3, -2.6) | -18.4 (-19.2, -17.9) | -5 (-5.3, -4.7)   | -4.5 (-5.2, -3.7) | -5.9 (-8.6, -3.4) | -23 (-23.8, -22.3)   |

**Table S6.2.** Sensitivity analysis – change in the area under the curve (AUC) for deaths, compared to Scenario 1, with total fertility rate adjustment. Highlighted cells represent greater than 25% difference compared to the main results in Appendix V.

Scenarios

S2: current quintile-specific treatment coverage rates;

S3: national average of treatment coverage for all quintiles;

S4: treatment coverage proportional to quintile-specific baseline mortality risks;

S5: equal baseline mortality risk with current quintile-specific treatment coverage rates.

| Country       | MCV S2            | MCV S3            | MCV S4            | MCV S5               | PCV S2            | PCV S3            | PCV S4              | PCV S5               | RV S2             | RV S3             | RV S4                | RV S5                |
|---------------|-------------------|-------------------|-------------------|----------------------|-------------------|-------------------|---------------------|----------------------|-------------------|-------------------|----------------------|----------------------|
| Armenia       | 2.1 (-0.1, 4.5)   | -0.9 (-1.1, -0.7) | -2.7 (-6.9, 2)    | -7.6 (-10, -4.9)     | 0.5 (-0.3, 1.3)   | -2.3 (-2.6, -1.8) | -5.8 (-7.7, -3.9)   | -14.7 (-16.6, -12)   | 2.1 (1.3, 3)      | -2.3 (-2.6, -1.8) | -8.7 (-10.6, -6.5)   | -13.1 (-15.4, -10)   |
| Burundi       | 0.1 (-0.2, 0.6)   | -0.3 (-0.4, -0.2) | -3.3 (-11.7, 5.8) | -7 (-8.6, -5.3)      | 1.1 (0.8, 1.4)    | 0.2 (0.1, 0.3)    | -1.1 (-4, 2.2)      | -2.3 (-4.7, -0.3)    | 0.5 (0.3, 0.7)    | 0.2 (0, 0.3)      | -3.8 (-6.8, -0.7)    | -3.7 (-5.1, -2.4)    |
| Benin         | 0 (-1.3, 1.4)     | -1.8 (-1.9, -1.7) | -3.2 (-7.1, 1.4)  | -13.2 (-14.2, -12)   | -0.1 (-0.6, 0.3)  | -2 (-2.1, -1.9)   | -3.7 (-4.8, -2.4)   | -14.1 (-14.6, -13.5) | 0.7 (0.2, 1.1)    | -2.5 (-2.6, -2.3) | -6.5 (-7.6, -5.3)    | -14.2 (-14.9, -13.7) |
| Burkina Faso  | 1.4 (-1.5, 4.9)   | -2.4 (-2.7, -2.1) | -4.5 (-10.7, 2.5) | -11.5 (-15, -7.2)    | 3.1 (1.7, 4.6)    | -1.8 (-2, -1.6)   | -3.9 (-6.2, -1.4)   | -8.6 (-10.2, -6.8)   | 2.7 (1.7, 3.5)    | -2.7 (-3.1, -2.4) | -6.5 (-8.1, -4.8)    | -9.7 (-11.1, -8.5)   |
| Bangladesh    | 0.6 (-1.7, 3.1)   | -2.5 (-3, -2.1)   | -4 (-7.7, 0.1)    | -13.5 (-16.7, -10.1) | 2.4 (1.3, 3.6)    | -1.8 (-2, -1.7)   | -3.5 (-5, -1.9)     | -10.5 (-11.8, -9.1)  | 1.7 (1.1, 2.3)    | -2.4 (-2.6, -2.2) | -4.6 (-5.3, -3.8)    | -11.8 (-12.9, -10.9) |
| Cote d'Ivoire | -1.3 (-3.1, 0.6)  | -3.5 (-4.3, -2.9) | -5 (-8.5, -1)     | -18.5 (-20.8, -16.2) | 2.8 (1.7, 4)      | -1.3 (-1.8, -0.9) | -2.2 (-3.8, -0.6)   | -11.7 (-13.3, -10.2) | -1.2 (-2.1, -0.5) | -2.8 (-3.6, -2.2) | -4.6 (-6, -3.4)      | -17.5 (-19.5, -16)   |
| Cameroon      | -4 (-6, -1.7)     | -6.4 (-7.5, -5.3) | -8.7 (-12, -4.9)  | -24.8 (-27.5, -21.6) | -4.1 (-6.2, -2)   | -7.2 (-9, -5.3)   | -10.4 (-13.4, -7.3) | -26.1 (-29.8, -22.1) | -5 (-7.5, -2.8)   | -8 (-10.1, -6.1)  | -12.1 (-15.2, -9.2)  | -26.4 (-30.6, -22.4) |
| DRC           | -3.3 (-3.6, -3.1) | -3.5 (-3.7, -3.4) | -6 (-10.1, -1.1)  | -19.2 (-20, -18.6)   | -2 (-2.5, -1.3)   | -2.8 (-3.3, -2.2) | -5.1 (-6.7, -3.3)   | -15.7 (-17.1, -14)   | -3.4 (-3.9, -2.9) | -2.7 (-3.4, -2.1) | -6.5 (-8, -5)        | -18 (-19.8, -16.2)   |
| Congo         | -1.3 (-3.3, 1)    | -3.8 (-4.6, -3.1) | -6.4 (-12, -0.2)  | -17.9 (-21.1, -14.5) | 1.8 (-0.1, 3.6)   | -2.5 (-3.6, -1.3) | -5 (-8, -1.7)       | -12.9 (-16.1, -9.6)  | -1.2 (-2.7, 0.1)  | -3.9 (-5.1, -3)   | -7.8 (-10, -5.6)     | -17.5 (-20.3, -15)   |
| Comoros       | -4.2 (-4.8, -3.6) | -4.1 (-4.6, -3.4) | -6.3 (-11.3, -1)  | -22.3 (-23.6, -20.8) | -3.5 (-4.5, -2.2) | -4.2 (-5.2, -2.9) | -7 (-9.4, -4.6)     | -21.5 (-23.7, -18.5) | -4.1 (-4.9, -3)   | -3.7 (-4.6, -2.5) | -7.7 (-9.9, -5.2)    | -21.4 (-23.6, -18.8) |
| Ethiopia      | -1 (-2.9, 1.1)    | -3.7 (-3.9, -3.3) | -5.1 (-8.1, -1.4) | -15.3 (-18.3, -11.8) | 0.3 (-1.1, 2.3)   | -3.1 (-4.1, -1.8) | -4.7 (-6.3, -2.9)   | -13.6 (-16.1, -10.6) | 1.1 (-0.5, 2.8)   | -3.1 (-4.3, -1.9) | -6.1 (-7.9, -4)      | -12.9 (-15.4, -10.2) |
| Ghana         | -5.5 (-7.2, -4)   | -3.8 (-4.6, -3.1) | -5.9 (-11.5, 0.3) | -23.2 (-25, -21.4)   | -2.8 (-4.5, -1.1) | -1.9 (-3.7, 0.3)  | -3.4 (-7.2, 0.4)    | -18.8 (-22.4, -15.4) | -5.5 (-7, -4)     | -2.3 (-3.8, -0.8) | -4.9 (-8.2, -1.7)    | -21.2 (-24.2, -18.3) |
| Guinea        | 0 (-2.9, 3.3)     | -4 (-4.3, -3.6)   | -6 (-10.2, -0.9)  | -14.4 (-18.5, -9.6)  | 2 (0.1, 3.9)      | -3.9 (-4.7, -2.9) | -6.6 (-8.7, -4.4)   | -11.9 (-14.9, -8.7)  | 0.2 (-1.1, 1.6)   | -4.4 (-5.3, -3.4) | -9.2 (-11.3, -6.9)   | -15.2 (-17.6, -12.6) |
| Gambia        | -2 (-3, -1.4)     | -1.3 (-1.6, -1)   | -2.1 (-10.9, 7.6) | -12.7 (-14.3, -11.5) | -1.8 (-2.3, -1.4) | -0.7 (-0.9, -0.5) | -0.1 (-2.8, 3.2)    | -10.5 (-11.2, -9.8)  | -1.4 (-1.8, -1)   | -0.3 (-0.6, 0)    | 1.9 (-0.9, 5.1)      | -9.4 (-10.2, -8.5)   |
| Honduras      | -1 (-1.9, 0)      | -1.9 (-2.3, -1.4) | -3.5 (-11.8, 5.8) | -17 (-18.4, -15.6)   | 3.6 (1.5, 5.3)    | 1.5 (-0.3, 2.9)   | 3.6 (-1.3, 8.1)     | -7.7 (-12.4, -4.2)   | 0.3 (-1.9, 1.9)   | 0.3 (-2, 1.8)     | 0.7 (-5.1, 5)        | -13 (-18, -9.3)      |
| Haiti         | 0.5 (-1.5, 2.7)   | -2.2 (-2.6, -1.8) | -2.7 (-6.2, 1.7)  | -16.3 (-18.9, -13.4) | 1.8 (0.6, 3)      | -2 (-2.7, -1.3)   | -2 (-3.4, -0.4)     | -14.1 (-15.6, -12.6) | -1.2 (-3, 0.2)    | -4.2 (-5.8, -3)   | -5.9 (-8.1, -3.9)    | -18.3 (-20.9, -16.2) |
| Indonesia     | -0.2 (-1.4, 1.9)  | -1.7 (-1.9, -1.5) | -6.5 (-19.7, 7)   | -13.3 (-14.4, -11.8) | 2.1 (1, 3.6)      | -1.1 (-1.3, -0.9) | -5.3 (-10.6, 0.3)   | -9.4 (-10.6, -7.9)   | -1.6 (-1.9, -1.3) | -1.5 (-1.8, -1.1) | -10.1 (-14.4, -5.6)  | -13.5 (-15, -12.1)   |
| Kenya         | -4.9 (-5.7, -4.2) | -4.9 (-5.7, -4.2) | -9.2 (-19.7, 0.8) | -24.3 (-25.8, -23.1) | -3.5 (-4.6, -2.6) | -4.5 (-5.6, -3.7) | -9.2 (-13.5, -5.3)  | -22.3 (-24.5, -20.8) | -7.3 (-8.4, -6.5) | -5.6 (-6.7, -4.8) | -15.4 (-20.2, -11.5) | -27.3 (-29.3, -25.9) |

|                 |                   |                   |                     |                      |                   |                   |                     |                      |                    |                   |                      |                      |
|-----------------|-------------------|-------------------|---------------------|----------------------|-------------------|-------------------|---------------------|----------------------|--------------------|-------------------|----------------------|----------------------|
| Kyrgyz Republic | 3.9 (0.8, 7.9)    | -0.1 (-0.3, 0.2)  | -0.6 (-7.1, 7)      | -1.9 (-5.8, 3.3)     | 3.9 (2.5, 5.3)    | -0.3 (-0.8, 0.2)  | -0.9 (-3.3, 1.7)    | -1.7 (-4.2, 1)       | 5.9 (4.6, 7.1)     | -0.9 (-1.2, -0.6) | -3.4 (-5.6, -1.2)    | 0.4 (-1.8, 2.6)      |
| Cambodia        | -3.2 (-4.4, -2.4) | -2.2 (-2.6, -2)   | -5.8 (-15.6, 4.7)   | -17.9 (-19.6, -16.6) | -0.8 (-1.3, -0.1) | -0.9 (-1.5, -0.2) | -3 (-7.3, 1.8)      | -12.5 (-14.5, -9.8)  | -5.8 (-6.6, -4.8)  | -1.1 (-1.9, -0.3) | -4.4 (-8.5, -0.2)    | -17.4 (-20.2, -14.5) |
| Liberia         | -3.7 (-4, -3.4)   | -3.8 (-4.1, -3.5) | -5.8 (-11.2, 0.3)   | -21.7 (-22.4, -21.1) | -2.6 (-3.4, -1.6) | -2 (-2.9, -1)     | -3.5 (-6, -0.9)     | -19.3 (-21.2, -17.2) | -0.9 (-2, 0.1)     | -2.2 (-3.2, -1.2) | -5 (-7.6, -2.4)      | -17.5 (-19.4, -15.5) |
| Lesotho         | -5.1 (-6.5, -4)   | -4.5 (-5.8, -3.5) | -8 (-16, 0.6)       | -23.7 (-26.2, -21.5) | -3.1 (-5.4, -1.2) | -3.5 (-5.8, -1.6) | -7.5 (-13, -2.5)    | -21.3 (-26, -17.2)   | -8.9 (-10.9, -7.3) | -6.2 (-8.2, -4.5) | -15.2 (-20.6, -10.7) | -28.4 (-32.1, -25.3) |
| Mali            | 0.7 (-1.5, 3)     | -2.2 (-2.5, -2.1) | -4 (-7.3, -0.3)     | -12.1 (-14.8, -9.1)  | 2.4 (1.3, 3.5)    | -1.8 (-2.1, -1.5) | -3.8 (-5, -2.4)     | -9.4 (-11.1, -7.5)   | 1.8 (1.1, 2.4)     | -2 (-2.4, -1.7)   | -5.2 (-6.1, -4.1)    | -10.8 (-12.2, -9.3)  |
| Mozambique      | -3.1 (-4.7, -0.9) | -5.2 (-5.3, -5.1) | -10.2 (-18.3, -1.8) | -21.2 (-23.4, -18.1) | -2.8 (-3.6, -1.9) | -5.2 (-5.7, -4.7) | -10.9 (-13.9, -8.1) | -21.3 (-23.1, -19.2) | -1.3 (-2.3, -0.4)  | -5.1 (-5.7, -4.6) | -17.9 (-22.6, -13.5) | -19.3 (-21.2, -17.4) |
| Malawi          | -2.6 (-3.5, -1.3) | -3.4 (-4.1, -2.7) | -8.2 (-18.4, 2.5)   | -18.4 (-20.4, -16)   | -2.4 (-3.9, -0.7) | -4.7 (-5.8, -3.2) | -12.9 (-18.4, -7.4) | -20.4 (-23.6, -16.1) | -5.5 (-6.5, -4.4)  | -4.6 (-5.6, -3.4) | -19.6 (-25.3, -14)   | -24 (-26.5, -21.2)   |
| Niger           | 3.3 (0.2, 7.2)    | -0.7 (-0.8, -0.6) | -3.8 (-11.5, 4.7)   | -4.7 (-8.1, -0.1)    | 6.4 (4.4, 8.6)    | -0.5 (-0.6, -0.4) | -4.2 (-7, -1.4)     | -1.3 (-3.6, 1.1)     | 2.8 (2.2, 3.4)     | -0.5 (-0.6, -0.5) | -7.6 (-9.7, -5.4)    | -6.4 (-7.1, -5.7)    |
| Nigeria         | -1.3 (-3.3, 0.8)  | -3.9 (-4.4, -3.6) | -5.9 (-9.6, -1.8)   | -17.7 (-20.4, -14.7) | 0.1 (-0.8, 1)     | -3.4 (-3.6, -3.1) | -5.6 (-7.1, -4.1)   | -14.8 (-16.1, -13.4) | 0.4 (-0.2, 0.9)    | -3.3 (-3.6, -2.9) | -5.9 (-6.7, -4.9)    | -15.2 (-16.1, -14.2) |
| Nepal           | -4.2 (-5.9, -2.7) | -5.2 (-6.6, -3.9) | -6.7 (-10.8, -1.8)  | -24 (-26.8, -21.6)   | 0.4 (-1.3, 2)     | -1.5 (-3, 0)      | -1.8 (-4.2, 0.9)    | -16.1 (-19.3, -13.1) | -1.7 (-3.1, -0.4)  | -3.3 (-4.7, -2.2) | -5.2 (-7.4, -3.2)    | -20.2 (-22.6, -18)   |
| Pakistan        | -2 (-4.4, 1.6)    | -5 (-5.5, -4.5)   | -12.3 (-25.7, 0)    | -20.2 (-23.7, -15.1) | -0.7 (-1.9, 0.5)  | -4.1 (-4.6, -3.6) | -11.4 (-16, -6.9)   | -18 (-19.8, -16.1)   | 1.4 (0, 2.7)       | -4.5 (-5, -4.1)   | -19.2 (-24, -14.7)   | -15 (-17.2, -13)     |
| Rwanda          | 1.1 (-1.2, 4.3)   | -1.8 (-2.1, -1.6) | -4.7 (-12.9, 4.3)   | -11.1 (-13.9, -7.2)  | 3.3 (1.9, 5)      | -0.9 (-1.3, -0.5) | -3.8 (-8, 0.5)      | -7.4 (-9.5, -5.1)    | 3.8 (2.8, 4.8)     | -1.4 (-1.8, -1)   | -6.5 (-9, -3.9)      | -8.7 (-10.4, -7.2)   |
| Senegal         | -2.8 (-3.4, -2.3) | -2.5 (-3, -2)     | -4.2 (-8.2, 0.6)    | -17.3 (-18.9, -15.7) | -2.7 (-3.6, -1.8) | -1.7 (-2.6, -0.8) | -3.1 (-5.3, -0.7)   | -15.9 (-18.6, -12.9) | -0.5 (-1.4, 0.3)   | -0.9 (-1.7, -0.1) | -1.9 (-3.6, -0.2)    | -11.1 (-13.6, -8.7)  |
| Sierra Leone    | -0.8 (-1.8, 0.9)  | -2 (-2.3, -1.7)   | -3.6 (-11.9, 6.2)   | -13.3 (-14.8, -11.4) | -0.1 (-0.6, 0.5)  | -1 (-1.4, -0.5)   | -2.1 (-5.4, 1.8)    | -11.2 (-12.3, -10)   | 1.7 (0.9, 2.5)     | -1.4 (-1.9, -1)   | -5.3 (-8.2, -1.9)    | -10.7 (-11.9, -9.5)  |
| Chad            | 2.3 (0.3, 4.4)    | -0.4 (-0.5, -0.3) | -0.4 (-2.9, 2.5)    | -2.5 (-4.9, -0.1)    | 3.4 (2.5, 4.3)    | -0.1 (-0.3, 0)    | 0.1 (-0.7, 1.2)     | 0.2 (-0.9, 1.2)      | 3.3 (2.8, 3.8)     | -0.5 (-0.7, -0.4) | -0.7 (-1.3, 0)       | -1.7 (-2.7, -0.8)    |
| Togo            | -2.8 (-3.6, -1.9) | -3.7 (-4.1, -3.3) | -5.2 (-9.2, -0.4)   | -17.8 (-19.5, -16)   | -1.4 (-2, -0.8)   | -3.2 (-3.4, -3)   | -5.3 (-7.3, -3.3)   | -15.5 (-16.6, -14.5) | -5.1 (-5.9, -4.5)  | -5.2 (-5.8, -4.7) | -8 (-9.1, -7)        | -21.7 (-23.2, -20.5) |
| Tajikistan      | 1.7 (0.3, 3.6)    | -0.1 (-0.2, -0.1) | -0.7 (-8.5, 8)      | -4.7 (-6, -2.9)      | 2.9 (2.1, 3.9)    | 0 (-0.2, 0.3)     | -0.8 (-3.8, 2.6)    | -3.4 (-5, -1.3)      | 3.6 (2.9, 4.2)     | 0.1 (-0.2, 0.3)   | -1.3 (-4.1, 2)       | -2.6 (-4.4, -0.6)    |
| Timor-Leste     | -0.3 (-1.7, 2.2)  | -2 (-2.2, -1.8)   | -5.7 (-17.9, 6.9)   | -13.3 (-14.8, -10.6) | 1.3 (0.2, 2.6)    | -1.8 (-2.2, -1.2) | -5.4 (-9.7, -1)     | -11 (-12.7, -9)      | 2.2 (1.1, 3.3)     | -1.8 (-2.2, -1.3) | -10.9 (-15.7, -5.2)  | -10.1 (-11.8, -8.3)  |
| Tanzania        | -2.5 (-3.2, -1.7) | -3 (-3.5, -2.6)   | -5.6 (-12.1, 1.8)   | -18.3 (-19.7, -16.7) | 1.2 (0.3, 2.1)    | -0.6 (-1.3, 0)    | -2.3 (-5.4, 0.8)    | -12.4 (-14.3, -10.5) | 0.2 (-1, 1.1)      | -1.2 (-2.2, -0.4) | -4.5 (-8.2, -1.2)    | -13.3 (-15.9, -11.1) |
| Uganda          | -2.1 (-2.6, -1.7) | -1.8 (-2.2, -1.5) | -3.8 (-15.1, 9.1)   | -14.4 (-15.5, -13.4) | -0.9 (-1.4, -0.2) | -1.1 (-1.7, -0.5) | -2.1 (-6.6, 2.7)    | -11.3 (-12.4, -10.1) | -3.6 (-4.3, -2.8)  | -1.8 (-2.7, -1.1) | -8 (-12.8, -3.5)     | -17.1 (-18.9, -15.4) |
| Yemen           | -4.4 (-5.2, -3.5) | -5.3 (-5.8, -4.8) | -7.6 (-11.5, -3.2)  | -23.5 (-24.9, -22.1) | -2.9 (-3.4, -2.2) | -3.9 (-4.4, -3.3) | -6.2 (-7.7, -4.4)   | -20.6 (-21.9, -19.1) | -2.3 (-2.9, -1.6)  | -3.9 (-4.5, -3.3) | -7.5 (-8.9, -6)      | -20 (-21.4, -18.4)   |
| Zambia          | -1.7 (-2.8, -0.3) | -2.8 (-3.3, -2.4) | -6 (-16.6, 5.3)     | -18.8 (-20.1, -17)   | 0.8 (0, 1.7)      | -1.2 (-1.6, -0.9) | -4.1 (-8, 0)        | -14.7 (-16, -13.3)   | -1.3 (-1.8, -0.8)  | -1.8 (-2.4, -1.4) | -8.3 (-12, -4.5)     | -18.9 (-20.1, -17.8) |
| Zimbabwe        | -3 (-3.3, -2.7)   | -2.7 (-2.9, -2.5) | -4.1 (-8.3, 1.1)    | -18 (-18.5, -17.5)   | -4.5 (-4.9, -4.2) | -3.6 (-3.9, -3.3) | -5.8 (-7.6, -3.7)   | -21 (-21.9, -20.2)   | -4.7 (-5.3, -4.2)  | -4.7 (-5.3, -4.2) | -8.2 (-9.5, -6.7)    | -21.3 (-22.8, -20.3) |

N/A: estimates not available due to no vaccine introduction in 2016.

**Table S6.3.** Sensitivity analysis – change in the area under the curve for cases, compared to Scenario 1, with under-five mortality rate adjustment. Highlighted cells represent greater than 25% difference compared to the main results in Appendix V.

Scenarios:

- S2: current quintile-specific vaccine coverage rates;
- S3: national average of vaccine coverage for all quintiles;
- S4: vaccine coverage proportional to quintile-specific baseline mortality risks;
- S5: equal baseline morbidity risk with current quintile-specific vaccine coverage rates.

| Country       | MCV S2               | MCV S3               | MCV S4               | MCV S5               | PCV S2         | PCV S3            | PCV S4           | PCV S5               | RV S2          | RV S3          | RV S4            | RV S5                |
|---------------|----------------------|----------------------|----------------------|----------------------|----------------|-------------------|------------------|----------------------|----------------|----------------|------------------|----------------------|
| Armenia       | -2.9<br>(-3.3, -2.5) | 16.6<br>(14.9, 18.4) | -15.5 (-18.1, -12.7) | -15.1 (-16, -14)     | 0.1 (0, 0.2)   | 0.3 (0.1, 0.6)    | -0.3 (-1.2, 0.5) | -13.5 (-16.3, -10.1) | 0.1 (0, 0.3)   | 1.1 (0.1, 2.4) | -0.9 (-4.3, 2.1) | -16.6 (-17.6, -15.1) |
| Burundi       | 3.8 (3.4, 4.3)       | 13.8<br>(12.4, 15.4) | -14.9 (-18, -11.8)   | -4.6 (-6.2, -2.9)    | 0 (0, 0)       | 0.1 (0, 0.1)      | 0 (-1.1, 1.2)    | -2.1 (-4, -0.4)      | 0 (0, 0.1)     | 0.6 (0.1, 1.3) | -0.5 (-4.3, 2.7) | -4 (-5.8, -2.5)      |
| Benin         | 9.4 (9, 10)          | 7.3<br>(6.9, 7.7)    | -8 (-9, -7)          | 1.7 (1.1, 2.3)       | 0.4 (0.1, 0.6) | 0.3 (0.1, 0.6)    | -0.3 (-1.2, 0.5) | -7.1 (-7.6, -6.6)    | NA             | NA             | NA               | NA                   |
| Burkina Faso  | 9.3 (8.4, 10.3)      | 14.1<br>(12.9, 15.5) | -17 (-19.4, -14.8)   | 1 (-0.4, 2.2)        | 0.1 (0, 0.1)   | 0.2 (0.1, 0.4)    | -0.2 (-1.2, 0.8) | -4.8 (-5.7, -3.9)    | 0.2 (0, 0.5)   | 0.7 (0.1, 1.6) | -1 (-4.3, 1.7)   | -7.7 (-8.6, -7.1)    |
| Bangladesh    | 8.7 (7.9, 9.7)       | 16.0<br>(14.6, 17.6) | -18.5 (-21.2, -16.1) | -0.6 (-2.2, 1)       | 0.1 (0, 0.2)   | 0.3 (0.1, 0.5)    | -0.2 (-1.2, 0.8) | -5.9 (-6.4, -5.5)    | NA             | NA             | NA               | NA                   |
| Cote d'Ivoire | 8.6 (8, 9.2)         | 8.9<br>(8.3, 9.4)    | -10.1 (-12.2, -8.3)  | 0.2 (-1.6, 1.8)      | 0.5 (0.2, 0.8) | 0.1 (0, 0.2)      | -0.1 (-0.9, 0.8) | -2.1 (-3.5, -1.2)    | 0.5 (0.1, 0.9) | 0.6 (0.1, 1.3) | -0.7 (-2.7, 1)   | -8 (-9.6, -6.6)      |
| Cameroon      | 15 (13.8, 16.3)      | 18.6<br>(17.1, 20.3) | -21.6 (-23.7, -19.6) | -0.2 (-2.7, 2.4)     | 0.7 (0.3, 1.2) | 0.3 (0.1, 0.5)    | -0.4 (-1.3, 0.3) | -12.3 (-17.2, -7.7)  | 1 (0.1, 2)     | 1.5 (0.2, 3.2) | -1.5 (-4.3, 1)   | -19.8 (-21.4, -17.8) |
| DRC           | 8 (7.5, 8.6)         | 12.6<br>(11.8, 13.4) | -22 (-24.5, -19.7)   | -2.6 (-3.7, -1.6)    | 0.5 (0.2, 0.8) | 0.4 (0.1, 0.6)    | -0.4 (-1.2, 0.5) | -7.1 (-9.7, -4.5)    | NA             | NA             | NA               | NA                   |
| Congo         | 14.2 (13.1, 15.4)    | 14.4 (13.2, 15.7)    | -19.6 (-22.4, -16.7) | 4.4 (2.2, 6.4)       | 0.5 (0.2, 0.8) | 0.2 (0.1, 0.3)    | -0.2 (-1.1, 0.8) | -3.5 (-5.5, -1.5)    | 0.8 (0.1, 1.7) | 1.1 (0.1, 2.4) | -1.2 (-4.4, 1.4) | -10.8 (-12.8, -8.9)  |
| Comoros       | 11.1 (10.3, 11.9)    | 15.5 (14.3, 16.7)    | -17.9 (-19.8, -16)   | 1.4 (-0.1, 2.9)      | NA             | NA                | NA               | NA                   | NA             | NA             | NA               | NA                   |
| Ethiopia      | 11.5 (10.9, 12.3)    | 12.7 (11.9, 13.4)    | -13.8 (-15.2, -12.3) | 3.8 (2.7, 4.8)       | 0.6 (0.3, 1.1) | 0.3 (0.1, 0.5)    | -0.3 (-1.2, 0.6) | -5.9 (-9.8, -1.9)    | 1 (0.1, 2)     | 1.2 (0.1, 2.5) | -1.3 (-4.3, 1.1) | -9.9 (-11.2, -8.4)   |
| Ghana         | 4.1 (3.6, 4.6)       | 15.5 (14, 17.2)      | -14 (-17.7, -10)     | -4.9 (-6.4, -3.5)    | 0.1 (0, 0.1)   | 0 (-0.1, 0)       | 0 (-1.1, 1.3)    | -0.9 (-5, 2.2)       | 0.1 (0, 0.2)   | 0.8 (0.1, 1.8) | -0.6 (-4.6, 2.7) | -6.8 (-8.4, -5.2)    |
| Guinea        | 5.8 (5.5, 6.1)       | 7 (6.6, 7.3)         | -7.1 (-7.9, -6.4)    | -5.9 (-6.7, -5)      | NA             | NA                | NA               | NA                   | NA             | NA             | NA               | NA                   |
| Gambia        | -9.8 (-11.2, -8.6)   | 3.4 (3, 3.8)         | -9.2 (-13.8, -5.2)   | -16.3 (-18.1, -14.7) | -0.1 (-0.1, 0) | 0 (0, 0)          | 0.1 (-0.8, 1.1)  | -0.2 (-1.1, 0.8)     | 0 (0, 0)       | 0 (0, 0.1)     | 0 (-3.1, 2.9)    | -0.2 (-0.6, 0.2)     |
| Honduras      | -1.6 (-1.7, -1.4)    | 9.7 (8.8, 10.7)      | -10.6 (-13.1, -8.1)  | -10.8 (-11.6, -10.2) | 0 (0, 0.1)     | -0.3 (-0.4, -0.1) | 0.3 (-0.6, 1.3)  | 2.8 (-1, 4.7)        | 0 (0, 0.1)     | 0.6 (0.1, 1.2) | -0.6 (-4.4, 2.5) | -5.2 (-6.4, -4)      |
| Haiti         | -0.4 (-0.5, -0.4)    | 2.4 (2.3, 2.5)       | -2.5 (-3.2, -1.8)    | -7.6 (-8.2, -7.1)    | 0.1 (0, 0.1)   | 0 (0, 0)          | 0 (-0.3, 0.3)    | -1.7 (-3.4, -0.5)    | 0.5 (0.1, 1)   | 0.7 (0.1, 1.5) | -0.9 (-3.7, 1.6) | -8.7 (-10, -7.4)     |
| Indonesia     | 4.1 (3.8, 4.4)       | 12.3 (11.4, 13.2)    | -14.1 (-16.3, -12.1) | -7.7 (-8.5, -6.9)    | NA             | NA                | NA               | NA                   | NA             | NA             | NA               | NA                   |
| Kenya         | 7.5 (7, 8.1)         | 16.2 (15, 17.5)      | -18.2 (-20.1, -16.3) | -1.7 (-3.1, -0.6)    | 0.1 (0, 0.2)   | 0.4 (0.2, 0.7)    | -0.4 (-1.3, 0.5) | -7.4 (-8.6, -6.4)    | 0.1 (0, 0.2)   | 1.2 (0.1, 2.6) | -1.1 (-4.5, 1.6) | -10.2 (-11.9, -9)    |



|                 |                   |                   |                      |                    |                  |                  |                  |                     |                |                |                  |                      |
|-----------------|-------------------|-------------------|----------------------|--------------------|------------------|------------------|------------------|---------------------|----------------|----------------|------------------|----------------------|
| Kyrgyz Republic | -4.3 (-4.9, -3.7) | 6.9 (6.1, 7.9)    | -3.3 (-6.7, 0.1)     | -8.3 (-9.3, -7.3)  | -0.2 (-0.4, 0.1) | 0 (0, 0.1)       | 0 (-0.8, 0.8)    | -2.6 (-4.1, -1)     | NA             | NA             | NA               | NA                   |
| Cambodia        | 14.5 (13.1, 16)   | 13.7 (12.5, 15.1) | -14.9 (-17.6, -12.3) | 3.9 (2.1, 5.8)     | 0.3 (0.1, 0.5)   | -0.1 (-0.1, 0)   | 0 (-1.1, 1.2)    | -1.3 (-5.4, 3.2)    | NA             | NA             | NA               | NA                   |
| Liberia         | 4.1 (3.9, 4.3)    | 7.3 (6.9, 7.7)    | -7.5 (-8.4, -6.7)    | -4 (-4.6, -3.5)    | 0.3 (0.1, 0.5)   | 0.1 (0, 0.1)     | -0.1 (-0.9, 0.8) | -1.8 (-5, 1.1)      | 0.2 (0, 0.5)   | 0.5 (0.1, 1)   | -0.5 (-2.3, 1)   | -6.4 (-7, -5.7)      |
| Lesotho         | 3.6 (3.2, 4)      | 17.4 (15.6, 19.3) | -18.2 (-20.9, -15.5) | -5.3 (-7.8, -3.4)  | 0 (0, 0)         | 0.3 (0.1, 0.5)   | -0.3 (-1.2, 0.8) | -4.6 (-8.6, -1.5)   | NA             | NA             | NA               | NA                   |
| Mali            | 9.4 (8.7, 10.2)   | 15.3 (14.2, 16.4) | -22 (-24.3, -19.9)   | 0.1 (-1.1, 1.2)    | 0.5 (0.2, 0.8)   | 0.4 (0.2, 0.7)   | -0.4 (-1.2, 0.4) | -7.3 (-9.1, -5.2)   | 0.6 (0.1, 1.3) | 1.3 (0.2, 2.7) | -1.2 (-3.9, 1)   | -10.3 (-11.1, -9.4)  |
| Mozambique      | 9.9 (9.1, 10.8)   | 17.9 (16.6, 19.2) | -23.6 (-25.8, -21.6) | -2.4 (-3.5, -1.1)  | 0.3 (0.1, 0.5)   | 0.6 (0.2, 0.9)   | -0.5 (-1.4, 0.2) | -12.3 (-14.8, -9.9) | 0.4 (0.1, 0.9) | 1.5 (0.2, 3.2) | -1.5 (-4.5, 0.9) | -14.9 (-15.7, -13.9) |
| Malawi          | 3 (2.7, 3.3)      | 17 (15.4, 18.7)   | -20.6 (-23.2, -17.8) | -7.1 (-8.8, -5)    | 0 (0, 0.1)       | 0.4 (0.2, 0.7)   | -0.4 (-1.3, 0.4) | -11.5 (-15.4, -7.4) | 0 (0, 0.1)     | 1.1 (0.1, 2.3) | -1.2 (-4.2, 1.4) | -14.7 (-16.6, -12.4) |
| Niger           | 8.4 (7.8, 8.9)    | 11.7 (11, 12.5)   | -12.7 (-14.2, -11.3) | 1.9 (1.2, 2.6)     | 0.5 (0.2, 0.8)   | 0.3 (0.1, 0.6)   | -0.3 (-1.1, 0.4) | -6.3 (-7.1, -5.5)   | 0.9 (0.1, 1.9) | 1 (0.1, 2.2)   | -1.1 (-4.4, 1.6) | -7.3 (-8.1, -6.2)    |
| Nigeria         | 17.1 (16.2, 17.9) | 6.2 (5.9, 6.4)    | -7.8 (-8.8, -6.9)    | 7.5 (5.9, 8.9)     | 1.3 (0.5, 2.1)   | 0.3 (0.1, 0.5)   | -0.3 (-1.1, 0.3) | -7.6 (-9, -6.3)     | NA             | NA             | NA               | NA                   |
| Nepal           | 5.6 (5, 6.3)      | 12.2 (11.1, 13.4) | -18.7 (-22, -15.4)   | -3.3 (-5.8, -1)    | 0.2 (0.1, 0.3)   | 0 (-0.1, 0)      | 0 (-0.9, 1.2)    | -0.4 (-4, 2.9)      | NA             | NA             | NA               | NA                   |
| Pakistan        | 13.5 (12.8, 14.3) | 11.6 (11, 12.3)   | -16.4 (-18.5, -14.2) | 0.4 (-1.1, 1.9)    | 0.8 (0.3, 1.4)   | 0.4 (0.2, 0.7)   | -0.5 (-1.4, 0.4) | -9 (-10.9, -7.4)    | NA             | NA             | NA               | NA                   |
| Rwanda          | 3.7 (3.2, 4.3)    | 13.5 (12.1, 15.2) | -13.5 (-16.7, -10.4) | -5 (-6.1, -3.9)    | 0 (0, 0.1)       | 0.1 (0, 0.1)     | 0 (-1.2, 1.3)    | -1.8 (-3.9, -0.2)   | 0.1 (0, 0.1)   | 0.9 (0.1, 2)   | -0.6 (-4.5, 2.7) | -6.7 (-8, -5.6)      |
| Senegal         | 2.7 (2.5, 2.9)    | 13.1 (12.2, 14.3) | -16.4 (-19, -13)     | -9.4 (-10.9, -7.9) | 0.1 (0, 0.2)     | 0.2 (0.1, 0.3)   | -0.1 (-1.1, 0.9) | -4.6 (-7.6, -2.3)   | 0.2 (0, 0.5)   | 0.7 (0.1, 1.6) | -0.7 (-4.4, 2.3) | -5.4 (-7.4, -2.8)    |
| Sierra Leone    | -0.8 (-0.9, -0.8) | 8.2 (7.6, 8.9)    | -8.3 (-10.2, -6.4)   | -5.9 (-6.7, -5.2)  | -0.1 (-0.1, 0)   | 0.1 (0, 0.1)     | 0 (-0.9, 1)      | -1.3 (-2.5, 0)      | 0 (0, 0)       | 0.6 (0.1, 1.2) | -0.6 (-3.6, 2.1) | -4.4 (-5.2, -3.8)    |
| Chad            | 3 (2.8, 3.1)      | 0.6 (0.6, 0.7)    | -0.5 (-1.1, 0.1)     | 2 (1.4, 2.5)       | NA               | NA               | NA               | NA                  | NA             | NA             | NA               | NA                   |
| Togo            | 3.8 (3.5, 4.2)    | 9.3 (8.6, 10.1)   | -17.7 (-20.5, -15)   | -5.8 (-6.8, -4.9)  | 0.1 (0, 0.1)     | 0.2 (0.1, 0.4)   | -0.3 (-1.2, 0.5) | -7.7 (-8.8, -6.7)   | 0.1 (0, 0.3)   | 0.8 (0.1, 1.8) | -1.1 (-4, 1.4)   | -13.8 (-14.8, -12.9) |
| Tajikistan      | 1.3 (1.1, 1.5)    | 8 (7.1, 9.1)      | -3.9 (-7.1, -0.6)    | -4.3 (-4.9, -3.6)  | NA               | NA               | NA               | NA                  | -0.1 (-0.3, 0) | 0.4 (0, 0.9)   | -0.3 (-4.1, 3.2) | -3.1 (-3.9, -2)      |
| Timor-Leste     | 10.9 (10.3, 11.7) | 10.2 (9.5, 10.8)  | -10.4 (-11.8, -9)    | 4 (3, 4.8)         | -1.4 (-3.4, 0.6) | -1.6 (-3.5, 0.3) | -2.1 (-4.2, 0)   | -16 (-19.8, -12)    | NA             | NA             | NA               | NA                   |
| Tanzania        | 6.3 (5.5, 7.2)    | 16 (14.3, 17.9)   | -14.4 (-17.3, -11.7) | -1.3 (-2.5, -0.1)  | 0.1 (0.1, 0.2)   | 0 (0, 0)         | 0.1 (-1.1, 1.3)  | -0.1 (-3.1, 2.2)    | 0.2 (0, 0.5)   | 0.8 (0.1, 1.8) | -0.6 (-4.5, 2.5) | -5.9 (-6.7, -5.1)    |
| Uganda          | 3.5 (3.2, 3.8)    | 8 (7.4, 8.7)      | -8.7 (-11.5, -6.3)   | -2.6 (-3.6, -1.6)  | 0 (0, 0)         | 0 (0, 0)         | 0 (-0.8, 0.8)    | -1.5 (-3.2, 0.2)    | 0 (0, 0)       | 0.2 (0, 0.3)   | -0.1 (-0.6, 0.3) | -6.8 (-7.7, -6.1)    |
| Yemen           | 11.6 (10.7, 12.4) | 17.7 (16.4, 19)   | -20.4 (-22.2, -18.7) | 0.4 (-1, 1.7)      | 0.5 (0.2, 0.9)   | 0.4 (0.2, 0.7)   | -0.3 (-1.3, 0.7) | -7.3 (-9.1, -5.3)   | 0.9 (0.1, 1.9) | 1.3 (0.2, 2.8) | -1.1 (-4.7, 1.8) | -9.1 (-10, -8)       |
| Zambia          | 7.6 (6.9, 8.3)    | 12.7 (11.6, 13.9) | -13.6 (-15.9, -11.5) | 0 (-1.1, 1)        | 0.2 (0.1, 0.4)   | 0.1 (0.1, 0.2)   | -0.1 (-1.2, 1)   | -2.9 (-4.3, -1.3)   | 0.3 (0, 0.7)   | 0.8 (0.1, 1.6) | -0.7 (-4.4, 2.4) | -5.8 (-6.6, -5.2)    |
| Zimbabwe        | 6.7 (6, 7.5)      | 12 (10.9, 13.3)   | -16 (-18.4, -13.5)   | -0.5 (-1.5, 0.5)   | 0.2 (0.1, 0.4)   | 0.2 (0.1, 0.4)   | -0.3 (-1.2, 0.7) | -7.8 (-8.5, -7.3)   | 0.3 (0, 0.6)   | 0.9 (0.1, 1.9) | -1 (-4.2, 1.8)   | -11.9 (-12.6, -11.3) |

N/A: estimates not available due to no vaccine introduction in 2016.

**Table S6.4.** Sensitivity analysis – change in the area under the curve for death, compared to Scenario 1, with under-five mortality rate adjustment. None of the cells had greater than 25% difference compared to the main results in Appendix V.

Scenarios

S2: current quintile-specific treatment coverage rates;

S3: national average of treatment coverage for all quintiles;

S4: treatment coverage proportional to quintile-specific baseline mortality risks;

S5: equal baseline mortality risk with current quintile-specific treatment coverage rates.

| Country       | MCV S2            | MCV S3   | MCV S4            | MCV S5               | PCV S2            | PCV S3   | PCV S4            | PCV S5              | RV S2             | RV S3    | RV S4             | RV S5               |
|---------------|-------------------|----------|-------------------|----------------------|-------------------|----------|-------------------|---------------------|-------------------|----------|-------------------|---------------------|
| Armenia       | 3 (0.8, 5.3)      | 0 (0, 0) | -1.9 (-6.2, 2.8)  | -8.7 (-11, -6.1)     | 2.8 (2.1, 3.6)    | 0 (0, 0) | -3.8 (-5.7, -1.9) | -12.5 (-14.4, -9.9) | 4.6 (3.9, 5.2)    | 0 (0, 0) | -6.8 (-8.6, -4.9) | -10.2 (-12.5, -7.2) |
| Burundi       | 0.5 (0.1, 0.9)    | 0 (0, 0) | -3.1 (-11.7, 6.4) | -7.9 (-9.5, -6.3)    | 1 (0.7, 1.3)      | 0 (0, 0) | -1.3 (-4.3, 2.1)  | -1.9 (-4.3, 0.2)    | 0.6 (0.4, 0.7)    | 0 (0, 0) | -4.1 (-7.2, -0.9) | -3.1 (-4.5, -1.8)   |
| Benin         | 1.8 (0.5, 3.1)    | 0 (0, 0) | -1.5 (-5.7, 3.3)  | -6.6 (-7.7, -5.3)    | 1.8 (1.4, 2.3)    | 0 (0, 0) | -1.8 (-3.1, -0.4) | -6.1 (-6.5, -5.6)   | 3.3 (2.8, 3.7)    | 0 (0, 0) | -4.6 (-5.7, -3.4) | -5.9 (-6.6, -5.3)   |
| Burkina Faso  | 4.4 (1.1, 8.7)    | 0 (0, 0) | -2.7 (-9.9, 5.1)  | -3.8 (-7.5, 0.9)     | 6.1 (4.3, 8)      | 0 (0, 0) | -2.7 (-5.4, 0.1)  | 0.6 (-1.2, 2.6)     | 6.6 (5.5, 7.5)    | 0 (0, 0) | -5 (-6.7, -3.2)   | -0.3 (-1.7, 1)      |
| Bangladesh    | 3.6 (1, 6.3)      | 0 (0, 0) | -1.7 (-5.5, 2.6)  | -5.4 (-8.7, -1.9)    | 5 (3.7, 6.3)      | 0 (0, 0) | -1.9 (-3.4, -0.1) | -1.1 (-2.5, 0.4)    | 5.2 (4.5, 5.8)    | 0 (0, 0) | -2.5 (-3.2, -1.7) | -2.1 (-3.2, -1.2)   |
| Cote d'Ivoire | 2.5 (0.7, 4.5)    | 0 (0, 0) | -1.8 (-5.8, 2.7)  | -7.1 (-9.4, -4.7)    | 4.6 (3.4, 5.8)    | 0 (0, 0) | -1.1 (-2.7, 0.8)  | 0.7 (-0.9, 2.3)     | 1.8 (1.6, 2)      | 0 (0, 0) | -2.3 (-3.1, -1.3) | -5 (-6.9, -3.6)     |
| Cameroon      | 2.9 (0.8, 5.1)    | 0 (0, 0) | -2.7 (-6.4, 1.5)  | -14.8 (-17.5, -11.7) | 3.8 (2.9, 4.7)    | 0 (0, 0) | -4.2 (-6.2, -2.3) | -12.9 (-16.4, -9.1) | 4.2 (3.5, 4.7)    | 0 (0, 0) | -5.5 (-7, -4)     | -12.4 (-16.5, -8.6) |
| DRC           | 0.2 (0, 0.3)      | 0 (0, 0) | -2.9 (-7.2, 2.3)  | -13.1 (-13.9, -12.4) | 0.9 (0.6, 1.1)    | 0 (0, 0) | -2.9 (-4.5, -1.1) | -8.8 (-10.3, -7.2)  | -1.1 (-1.3, -0.9) | 0 (0, 0) | -4.7 (-5.9, -3.3) | -11.2 (-13, -9.4)   |
| Congo         | 3.1 (0.8, 6)      | 0 (0, 0) | -3 (-9, 3.6)      | -7.2 (-10.5, -3.4)   | 5.5 (3.9, 7.2)    | 0 (0, 0) | -3 (-5.8, 0.2)    | -0.7 (-3.8, 2.5)    | 3.9 (3.3, 4.5)    | 0 (0, 0) | -4.7 (-6.2, -3)   | -4.7 (-7.4, -2.4)   |
| Comoros       | -0.1 (-0.2, 0)    | 0 (0, 0) | -2.5 (-7.8, 3.3)  | -9.4 (-10.6, -8.1)   | 1 (0.7, 1.2)      | 0 (0, 0) | -3.2 (-5.3, -0.9) | -7.8 (-9.8, -5.2)   | -0.3 (-0.4, -0.2) | 0 (0, 0) | -4.5 (-6.2, -2.6) | -7.9 (-9.7, -5.6)   |
| Ethiopia      | 4 (1.1, 7)        | 0 (0, 0) | -1.9 (-5.6, 2.2)  | -5.9 (-9.2, -2)      | 5.4 (4, 6.7)      | 0 (0, 0) | -2.1 (-3.4, -0.7) | -2.9 (-5.4, 0.3)    | 6.3 (5.3, 7.2)    | 0 (0, 0) | -3.9 (-5, -2.4)   | -1.9 (-4.4, 0.8)    |
| Ghana         | -1.8 (-3.4, -0.4) | 0 (0, 0) | -2.5 (-9.3, 4.9)  | -10.2 (-12, -8.4)    | -0.9 (-1.1, -0.6) | 0 (0, 0) | -1.5 (-4.9, 1.8)  | -4.4 (-7.5, -1.4)   | -3.1 (-3.5, -2.6) | 0 (0, 0) | -2.9 (-5.5, -0.3) | -6.8 (-9.4, -4.3)   |
| Guinea        | 4.8 (1.3, 8.9)    | 0 (0, 0) | -2.4 (-7, 3)      | -6.7 (-11.2, -1.4)   | 7.9 (5.9, 10)     | 0 (0, 0) | -3.3 (-5.3, -1.3) | -1.3 (-4.4, 1.9)    | 6 (5.1, 6.9)      | 0 (0, 0) | -5.9 (-7.6, -4.2) | -4.5 (-6.8, -2.1)   |
| Gambia        | -0.9 (-2, -0.2)   | 0 (0, 0) | -1.2 (-11.2, 9.3) | -5.9 (-7.4, -4.7)    | -1.2 (-1.7, -0.8) | 0 (0, 0) | 0 (-3.2, 4)       | -2.1 (-2.8, -1.4)   | -1.3 (-1.6, -1)   | 0 (0, 0) | 1.2 (-1.9, 4.9)   | -0.9 (-1.6, 0)      |
| Honduras      | 1 (0.2, 2.1)      | 0 (0, 0) | -1.7 (-10.8, 8.6) | -8.9 (-10.1, -7.5)   | 2.5 (1.7, 3.4)    | 0 (0, 0) | 1.9 (-1.8, 6.5)   | 3.3 (-0.1, 5.9)     | 0.1 (0.1, 0.2)    | 0 (0, 0) | 0.3 (-3.7, 3.6)   | -0.7 (-4.5, 1.9)    |
| Haiti         | 3.6 (0.9, 6.5)    | 0 (0, 0) | -0.7 (-4.8, 4.2)  | -3.1 (-6, 0.2)       | 5 (3.7, 6.3)      | 0 (0, 0) | -0.4 (-1.9, 1.3)  | 1.9 (0.3, 3.5)      | 4.9 (4.1, 5.5)    | 0 (0, 0) | -2.6 (-4, -1.2)   | -1.1 (-3.7, 0.9)    |

|                 |                   |          |                    |                      |                 |          |                     |                     |                   |          |                      |                      |
|-----------------|-------------------|----------|--------------------|----------------------|-----------------|----------|---------------------|---------------------|-------------------|----------|----------------------|----------------------|
| Indonesia       | 1.5 (0.3, 3.6)    | 0 (0, 0) | -4.8 (-18.3, 8.9)  | -10.7 (-11.8, -9.2)  | 3 (2, 4.4)      | 0 (0, 0) | -4.3 (-9.7, 1.5)    | -3.7 (-5, -2.3)     | -0.4 (-0.5, -0.3) | 0 (0, 0) | -9 (-13.2, -4.4)     | -7 (-8.5, -5.6)      |
| Kenya           | 0.1 (0, 0.1)      | 0 (0, 0) | -5 (-16, 6.2)      | -9.2 (-10.4, -8.2)   | 1.4 (0.9, 1.9)  | 0 (0, 0) | -5.9 (-10, -1.7)    | -6.8 (-8.3, -5.6)   | -2 (-2.4, -1.6)   | 0 (0, 0) | -11.5 (-15.5, -8)    | -11.5 (-13, -10.5)   |
| Kyrgyz Republic | 4.8 (1.1, 9.8)    | 0 (0, 0) | -0.6 (-7.9, 7.8)   | 1.2 (-2.8, 6.6)      | 5.3 (3.8, 6.9)  | 0 (0, 0) | -0.7 (-3.1, 2.2)    | 3 (0.5, 5.7)        | 9 (7.4, 10.4)     | 0 (0, 0) | -3.1 (-5.3, -0.8)    | 6.1 (3.8, 8.3)       |
| Cambodia        | -1 (-2.3, -0.2)   | 0 (0, 0) | -3.6 (-13.6, 7.1)  | -12.8 (-14.5, -11.5) | 0.1 (0, 0.1)    | 0 (0, 0) | -2 (-6.4, 3.1)      | -3.9 (-5.8, -1.4)   | -5.2 (-6.1, -4.2) | 0 (0, 0) | -3.2 (-6.9, 0.8)     | -8.4 (-11.2, -5.5)   |
| Liberia         | -0.2 (-0.4, 0)    | 0 (0, 0) | -2.8 (-9.7, 4.6)   | -8.6 (-9.3, -8.1)    | -1.4 (-1.8, -1) | 0 (0, 0) | -1.9 (-4.5, 1)      | -5.8 (-7.6, -3.9)   | 1.3 (1.1, 1.5)    | 0 (0, 0) | -3.6 (-5.8, -1.3)    | -3.4 (-5.3, -1.5)    |
| Lesotho         | -0.6 (-1.2, -0.1) | 0 (0, 0) | -4.3 (-13.1, 5.3)  | -8.9 (-11.3, -6.9)   | 0.4 (0.3, 0.6)  | 0 (0, 0) | -4.9 (-9.6, -0.4)   | -6.5 (-10.9, -2.8)  | -2.7 (-3.1, -2.2) | 0 (0, 0) | -11.3 (-16, -7.3)    | -13.6 (-17.2, -10.7) |
| Mali            | 3.3 (0.9, 5.9)    | 0 (0, 0) | -2 (-5.5, 2)       | -7.5 (-10.4, -4.4)   | 4.9 (3.7, 6.2)  | 0 (0, 0) | -2.3 (-3.5, -0.8)   | -3.5 (-5.3, -1.7)   | 4.5 (3.9, 5)      | 0 (0, 0) | -3.7 (-4.5, -2.7)    | -4.8 (-6.2, -3.3)    |
| Mozambique      | 2.8 (0.7, 5.6)    | 0 (0, 0) | -6.3 (-15.7, 3.1)  | -11.4 (-13.9, -7.9)  | 3.4 (2.5, 4.5)  | 0 (0, 0) | -7.2 (-10.5, -4.1)  | -10.5 (-12.4, -8.3) | 5 (4.1, 5.9)      | 0 (0, 0) | -15.9 (-20.5, -11.3) | -8.2 (-10.2, -6.2)   |
| Malawi          | 0.9 (0.2, 2.2)    | 0 (0, 0) | -5.9 (-17.5, 6.1)  | -9.5 (-11.4, -7.1)   | 2.7 (1.9, 3.8)  | 0 (0, 0) | -10.4 (-16.3, -5.1) | -10.5 (-13.7, -6.3) | -1.4 (-1.6, -1.1) | 0 (0, 0) | -18.3 (-24.1, -12.7) | -14.5 (-16.9, -11.6) |
| Niger           | 4.3 (1, 8.6)      | 0 (0, 0) | -3.3 (-11.4, 5.6)  | -2.8 (-6.3, 1.8)     | 7.7 (5.5, 10.1) | 0 (0, 0) | -4 (-6.9, -0.9)     | 0.7 (-1.6, 3.1)     | 3.6 (3, 4.2)      | 0 (0, 0) | -7.5 (-9.7, -5.1)    | -4.6 (-5.3, -3.9)    |
| Nigeria         | 3.1 (0.8, 5.5)    | 0 (0, 0) | -2.4 (-6.5, 2.2)   | -9.8 (-12.7, -6.7)   | 4.6 (3.4, 5.8)  | 0 (0, 0) | -2.8 (-4.5, -1)     | -4.3 (-5.8, -2.8)   | 4.4 (3.9, 4.9)    | 0 (0, 0) | -3.3 (-4.1, -2.3)    | -4.4 (-5.3, -3.5)    |
| Nepal           | 1 (0.3, 1.9)      | 0 (0, 0) | -2.1 (-6.5, 3.1)   | -9.6 (-12, -7.6)     | 2.1 (1.5, 2.6)  | 0 (0, 0) | -0.7 (-2.5, 1.4)    | -1 (-3.7, 1.6)      | 1.7 (1.5, 1.9)    | 0 (0, 0) | -2.8 (-4.3, -1.3)    | -4.4 (-6.7, -2.4)    |
| Pakistan        | 3.8 (0.8, 8.4)    | 0 (0, 0) | -8.1 (-21.9, 5.1)  | -9.7 (-13.4, -4)     | 4.6 (3.2, 6.3)  | 0 (0, 0) | -8.2 (-12.8, -3.3)  | -5.6 (-7.5, -3.6)   | 8.2 (6.6, 9.8)    | 0 (0, 0) | -16.6 (-21.1, -12.1) | -2.1 (-4.4, 0)       |
| Rwanda          | 3.3 (0.7, 6.8)    | 0 (0, 0) | -3.1 (-12.1, 6.4)  | -5.4 (-8.4, -1.2)    | 5.4 (3.7, 7.5)  | 0 (0, 0) | -2.8 (-7.3, 2)      | 1 (-1.3, 3.4)       | 5.8 (4.8, 6.7)    | 0 (0, 0) | -5.3 (-7.8, -2.5)    | -0.1 (-2, 1.5)       |
| Senegal         | -0.4 (-0.8, -0.1) | 0 (0, 0) | -1.9 (-6.4, 3.4)   | -12.9 (-14.3, -11.5) | -1.6 (-2, -1.1) | 0 (0, 0) | -1.8 (-3.8, 0.4)    | -8.2 (-10.7, -5.4)  | 1 (0.8, 1.1)      | 0 (0, 0) | -1.3 (-2.5, 0.1)     | -2.7 (-5, -0.4)      |
| Sierra Leone    | 1.4 (0.3, 3.3)    | 0 (0, 0) | -2.5 (-12.8, 8.7)  | -3.6 (-5.1, -1.5)    | 1.2 (0.8, 1.6)  | 0 (0, 0) | -1.7 (-5.6, 3)      | -0.9 (-1.9, 0.3)    | 3.7 (2.9, 4.5)    | 0 (0, 0) | -5.3 (-8.7, -1.3)    | 0.1 (-1.2, 1.4)      |
| Chad            | 3.1 (0.9, 5.4)    | 0 (0, 0) | 0 (-2.7, 3)        | 1.9 (-0.6, 4.5)      | 4 (3.1, 5)      | 0 (0, 0) | 0.2 (-0.7, 1.4)     | 5.1 (4, 6.2)        | 4.3 (3.8, 4.8)    | 0 (0, 0) | -0.3 (-0.9, 0.4)     | 3.4 (2.3, 4.3)       |
| Togo            | 1.1 (0.3, 2.1)    | 0 (0, 0) | -1.9 (-6.1, 3.3)   | -10.3 (-12, -8.3)    | 2.5 (1.8, 3.2)  | 0 (0, 0) | -2.8 (-5.1, -0.6)   | -5.3 (-6.5, -4.1)   | 0.7 (0.5, 0.9)    | 0 (0, 0) | -3.8 (-4.6, -2.9)    | -10.9 (-12.3, -9.7)  |
| Tajikistan      | 1.8 (0.4, 3.6)    | 0 (0, 0) | -0.6 (-8.6, 8.2)   | -5.1 (-6.4, -3.4)    | 3 (2.1, 4)      | 0 (0, 0) | -0.8 (-3.9, 2.8)    | 0.6 (-1, 2.6)       | 3.5 (2.9, 4.1)    | 0 (0, 0) | -1.3 (-4.2, 1.9)     | 2 (0.3, 4)           |
| Timor-Leste     | 1.9 (0.4, 4.6)    | 0 (0, 0) | -4.2 (-17.2, 8.8)  | -5.2 (-6.9, -2.3)    | 3.4 (2.3, 4.8)  | 0 (0, 0) | -4.2 (-8.5, 0.6)    | -1.8 (-3.5, 0.2)    | 4.6 (3.5, 5.7)    | 0 (0, 0) | -10.4 (-14.9, -4.5)  | -0.7 (-2.4, 1.1)     |
| Tanzania        | 1.2 (0.3, 2.5)    | 0 (0, 0) | -3.3 (-11.7, 5.6)  | -6.5 (-8, -4.7)      | 3.1 (2.1, 4.2)  | 0 (0, 0) | -1.7 (-5.2, 2.2)    | 0.3 (-1.6, 2.1)     | 2.9 (2.4, 3.4)    | 0 (0, 0) | -3.7 (-7.2, -0.6)    | -0.5 (-2.9, 1.6)     |
| Uganda          | -0.3 (-0.9, -0.1) | 0 (0, 0) | -2.6 (-15.5, 10.7) | -7.2 (-8.3, -6.3)    | 0.5 (0.3, 0.7)  | 0 (0, 0) | -2 (-6.8, 3.6)      | -2.3 (-3.4, -1)     | -2.6 (-3.3, -1.9) | 0 (0, 0) | -8.4 (-13.5, -3.4)   | -7.8 (-9.7, -6.1)    |
| Yemen           | 1.2 (0.3, 2.2)    | 0 (0, 0) | -2.9 (-7.4, 2.2)   | -11 (-12.5, -9.5)    | 1.5 (1.1, 1.9)  | 0 (0, 0) | -2.7 (-4.3, -0.9)   | -7.5 (-8.6, -6.2)   | 2.3 (2, 2.6)      | 0 (0, 0) | -4.3 (-5.5, -2.9)    | -6.4 (-7.6, -5)      |

|          |                   |          |                 |                   |                 |          |                 |                     |                |          |                    |                     |
|----------|-------------------|----------|-----------------|-------------------|-----------------|----------|-----------------|---------------------|----------------|----------|--------------------|---------------------|
| Zambia   | 1.4 (0.3, 3.2)    | 0 (0, 0) | -4.1 (-17, 9.6) | -6.7 (-8.1, -4.6) | 3.2 (2.1, 4.5)  | 0 (0, 0) | -3.3 (-8, 1.8)  | -1 (-2.4, 0.6)      | 0 (-0.1, 0.1)  | 0 (0, 0) | -7.7 (-11.7, -3.4) | -5.3 (-6.5, -4.1)   |
| Zimbabwe | -0.3 (-0.7, -0.1) | 0 (0, 0) | -1.7 (-6.8, 4)  | -8.7 (-9.2, -8.2) | -1.4 (-1.8, -1) | 0 (0, 0) | -2.9 (-5, -0.6) | -10.4 (-11.3, -9.6) | 0.4 (0.3, 0.4) | 0 (0, 0) | -4.6 (-5.8, -3.3)  | -10.1 (-11.5, -9.1) |

## VII. References

1. USAID, ICF Macro International. Demographic and Health Surveys (DHS) Program. [cited 2016 Oct 15]. Available from: <http://dhsprogram.com>.
2. GBD 2013 Risk Factors Collaborators. Global, regional, and national comparative risk assessment of 79 behavioural, environmental and occupational, and metabolic risks or clusters of risks in 188 countries, 1990–2013: a systematic analysis for the Global Burden of Disease Study 2013. *The Lancet*. 2015;386(10010):2287–2323.
